# Supplementary material
Source: PubMed Central journal article supplement (PMC8962000)
Supplement: NIHMS1789765-supplement-Supplementary_Material.pdf [file NIHMS1789765-supplement-Supplementary_Material.pdf]

**Supporting Information**

**Kinetic Analysis of a Cysteine-Derived Thiyl-Catalyzed Asymmetric Vinyl  
Cyclopropane Cycloaddition Reflects Numerous Attractive Non-Covalent  
Interactions**

Amanda K. Turek, Marcus H. Sak, and Scott J. Miller\*

*Department of Chemistry, Yale University, 225 Prospect Street, New Haven, Connecticut 06520,  
United States*

**Table of Contents**

|                                                                      |      |
|----------------------------------------------------------------------|------|
| <b>I. General Information</b> .....                                  | S-2  |
| A. Materials and Instrumentation .....                               | S-2  |
| B. Abbreviations .....                                               | S-2  |
| <b>II. Kinetics Procedures</b> .....                                 | S-3  |
| A. General Procedures for Kinetics Experiments .....                 | S-3  |
| B. Determination of Calibration Curve.....                           | S-4  |
| C. Different Excess Experiments.....                                 | S-7  |
| D. Catalyst Concentration Experiments.....                           | S-12 |
| E. Same Excess Experiments.....                                      | S-15 |
| F. Experiments Using <i>n</i> -Butyl Disulfide as Catalyst.....      | S-17 |
| G. Further Investigation of Induction Period.....                    | S-19 |
| H. Experiments Using Enantiopure VCP.....                            | S-19 |
| I. Experiments Using Unsubstituted Catalyst .....                    | S-23 |
| J. Experiments Using Unsubstituted Catalyst and Enantiopure VCP..... | S-25 |
| <b>III. Synthesis of Enantiopure Vinylcyclopropanes</b> .....        | S-26 |
| <b>IV. Vinylcyclopropane Binding Studies by NMR Titration</b> .....  | S-27 |

|                                                                                       |             |
|---------------------------------------------------------------------------------------|-------------|
| A. General Procedure.....                                                             | S-27        |
| B. Binding Studies with Racemic VCP .....                                             | S-28        |
| C. Binding Studies with ( <i>R</i> )-VCP.....                                         | S-30        |
| <b>V. Computational Methods and Results .....</b>                                     | <b>S-31</b> |
| A. General Information.....                                                           | S-31        |
| B. Calculated High-Level VCP Conformer Energies .....                                 | S-33        |
| C. Calculated High-Level VCP Dimerization Energies .....                              | S-34        |
| D. Calculated High-Level <b>I<sub>R</sub></b> and <b>I<sub>S</sub></b> Energies ..... | S-34        |
| E. Coordinates and Energies at Initial Level of Optimization.....                     | S-35        |
| <b>VI. Complete Raw Data for Kinetics Experiments.....</b>                            | <b>S-43</b> |

## I. General information

### A. Materials and Instrumentation

UV reactions were conducted with an unfiltered BLAK-RAY MODEL B 100AP UV lamp (365 nm filter removed). Kinetic data were acquired using an Agilent 1100 series analytical chiral HPLC equipped with a photodiode array detector (254 nm) with a Chiralpak IB column (5  $\mu\text{m}$  particle size, 4.5 x 250 mm). Enantiomeric excesses were also determined on the same instrument, using Chiralpak IA and IB columns. Optical rotations were recorded on a Perkin Elmer Polarimeter 341 at the sodium D line (1.0 dm path length) at 20 °C. Kinetics data were processed and analyzed using Origin 2018.<sup>1</sup> Normal-phase column chromatography was performed with either silica gel 60 Å (32-63 microns) or with a Biotage Isolera One flash purification system equipped with Ultra HP-Sphere 25  $\mu\text{m}$  columns. All reaction solvents were purified using a Seca Solvent Purification System by Glass Contour (in which the solvents were dried over alumina and dispensed under an argon atmosphere). All reagents were purchased from commercial sources and used as received unless otherwise noted.

### B. Abbreviations

cat = catalyst

<sup>1</sup> Origin, Version 2018. OriginLab Corporation, Northampton, MA, USA.

CV = column volumes

DCM = dichloromethane

DFT = density functional theory

DIPEA = diisopropylethylamine

ee = enantiomeric excess

h = hour

HATU = *O*-(7-azabenzotriazol-1-yl)-*N,N,N',N'*-tetramethyluronium hexafluorophosphate

HPLC = high-performance liquid chromatography

RT = room temperature

TBVE = *tert*-butyl vinyl ether

THF = tetrahydrofuran

VCP = vinylcyclopropane

W = Watt

## II. Kinetics Procedures

Syntheses of the catalysts used in the following kinetics procedures have been previously reported by our group.<sup>2</sup> Although the reactions in our initial report were carried out in 2:1 hexanes/THF, these kinetic studies were carried out in pure THF for the sake of consistency.

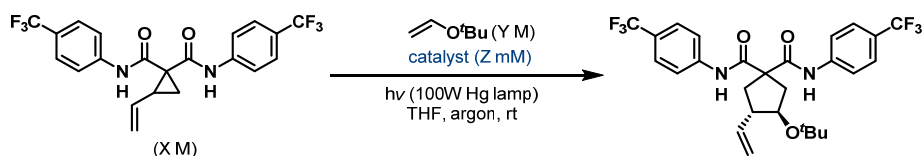

### A. General Procedure for Kinetics Experiments

<sup>2</sup> Ryss, J. M.; Turek, A. K.; Miller, S. J. Disulfide-Bridged Peptides That Mediate Enantioselective Cycloadditions Through Thiol Radical Catalysis. *Org. Lett.* **2018**, *20*, 1621–1625.

An oven-dried quartz Schlenk tube<sup>3</sup> equipped with a magnetic stir bar was charged with the vinylcyclopropane (X M) and the peptide catalyst (Z mM), and the solids were dissolved in tetrahydrofuran (3 or 4 mL) freshly pulled from a solvent purification system and added using a gastight syringe. *Tert*-butyl vinyl ether (Y M) was added via gastight syringe, with the needle submerged in the reaction mixture to prevent evaporation of the reagent. The Schlenk tube was sealed with a Precision Seal<sup>®</sup> rubber septum, which was secured with copper wire. The reaction mixture was subjected to five freeze-pump-thaw cycles, backfilling with argon. After warming to room temperature, the Schlenk tube was wrapped in aluminum foil and was placed in front of a UV lamp that had been warmed up for at least 30 minutes. A fan was positioned above the flask for additional temperature control. The foil was removed and a timer was started simultaneously. Reaction aliquots (30  $\mu$ L) were collected at evenly spaced time points as follows: a 50  $\mu$ L gastight syringe fitted with a 6-inch needle was purged with argon five times in a separate Schlenk tube, and 30  $\mu$ L of the reaction mixture (plus gas bubble) was collected.<sup>4</sup> The aliquot was added to a 1 mL volumetric flask, and a timepoint was recorded at this point. The needle was flushed into the volumetric flask<sup>5</sup> and the sample was diluted to 1 mL with 10% IPA/hexanes, filtered through a plug of Kimtech<sup>®</sup> laboratory wipe, and analyzed by HPLC (Chiralpak IB, 10% IPA/hexanes, 1 mL/min, 8.5 min, 5  $\mu$ L injection volume, 254 nm) to determine conversion of starting material (retention time of vinylcyclopropane starting material = 6.8 minutes).

The enantiomeric excesses of the product and remaining VCP were determined by HPLC using the following conditions:

Product: Chiralpak IA, 5% IPA/hexanes, 1 mL/min, 30 min, 5  $\mu$ L injection volume, 254 nm

VCP: Chiralpak IB, 2% IPA/hexanes, 1.2 mL/min, 25 min, 40 °C, 5  $\mu$ L injection volume, 254 nm

## B. Determination of Calibration Curve

The absorbance data obtained by HPLC were converted to concentration data using a response factor determined from a modified Beer's Law plot shown below (Figure S1). These data were obtained as follows: A 5 mM stock solution of the VCP substrate in THF was prepared in a 5 mL volumetric flask. Samples of varying concentration were obtained by taking aliquots of the stock solution and diluting to 1 mL with 10% IPA/hexanes in a volumetric flask. Repeated twice for each concentration. The solutions were analyzed by HPLC (Chiralpak IB, 10% IPA/hexanes, 1 mL/min, 8.5 min, 5  $\mu$ L injection volume, 254 nm) to determine the absorbance at each concentration. This procedure was repeated with a second stock solution. The peaks corresponding

---

<sup>3</sup> Prepared by Daryl Smith, glassblower at Yale University. No reaction or very sluggish reaction rates were observed when standard glass Schlenk tubes were used.

<sup>4</sup> Attempts to purge the gas bubble resulted in irreproducible data.

<sup>5</sup> The volume in the syringe needle was determined to be 3.4  $\mu$ L. The needle volume for a standard 2-inch removable needle is reported to be 1.13  $\mu$ L (<https://www.hamiltoncompany.com/laboratory-products/syringes/80230>). This is multiplied by three to estimate the needle volume for a 6-inch removable needle.

to VCP substrate were integrated, and the resulting areas from all experiments were simultaneously plotted against the absolute concentration of each sample (Figure S1). The data were fit to a linear equation (1). The slope obtained from this fit determines the response factor used to convert absorbance data to concentration. All data have been obtained on a single HPLC instrument; therefore, the path length is assumed to be constant for the calibration plot and kinetics data collection.

$$\text{Area} = \text{response factor} \times [\text{VCP}] \quad (1)$$

### Run 1

VCP mass: 12.2 mg

Stock solution concentration: 5.52 mM

### Run 2

VCP mass: 14.7 mg

Stock solution concentration: 6.65 mM

**Table S1.** Data for calibration curve

| <i>Volume of stock solution used</i><br>( $\mu\text{L}$ ) | <b>Run 1</b>  |               |               | <b>Run 2</b>  |               |               |
|-----------------------------------------------------------|---------------|---------------|---------------|---------------|---------------|---------------|
|                                                           | [VCP]<br>(mM) | area<br>(mAU) | area<br>(mAU) | [VCP]<br>(mM) | area<br>(mAU) | area<br>(mAU) |
| 300                                                       | 1.65          | 10300         | 10900         | 1.99          | 11400         | 14200         |
| 250                                                       | 1.38          | 9070          | 9220          | 1.66          | 9530          | 12000         |
| 200                                                       | 1.10          | 7280          | 7350          | 1.33          | 9100          | 9510          |
| 150                                                       | 0.83          | 5480          | 5560          | 1.00          | 6950          | 7330          |
| 100                                                       | 0.55          | 3670          | 3670          | 0.66          | 4660          | 4820          |
| 50                                                        | 0.28          | 1840          | 1850          | 0.33          | 2390          | 2410          |
| 20                                                        | 0.11          | 745           | 726           | 0.13          | 951           | 982           |
| 10                                                        | 0.06          | 381           | 379           | 0.07          | 485           | 500           |

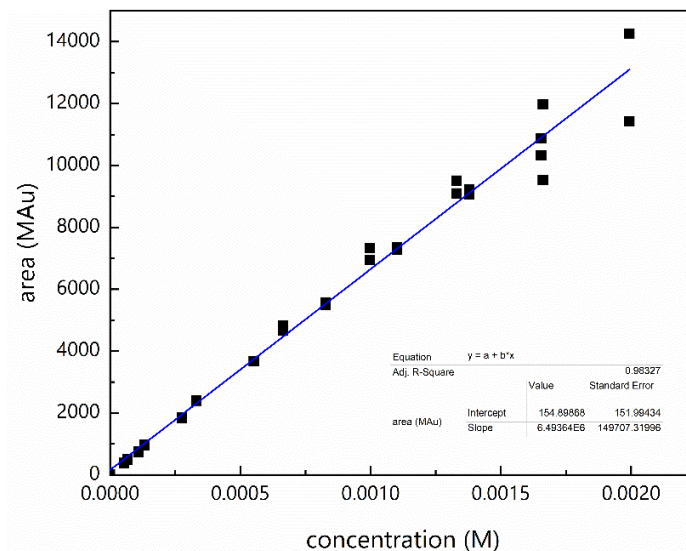

**Figure S1.** Calibration curve to determine HPLC response factor.

$$\text{Response factor} = 6.4936 \times 10^6$$

Using this correction factor, the absorbance data collected from each kinetics experiment were converted to concentration data. Duplicate experiments were co-plotted on a single graph. Unless specifically stated otherwise, all data analysis was carried out using duplicate data sets simultaneously. The data were analyzed using the method described by Burés.<sup>6</sup> This method was chosen due to the fact that an *in situ* method for monitoring conversion was not used, leading to errors and artifacts when the data were converted to rate. A direct comparison of the concentration profiles was thus more suitable for analysis of these data. In some cases, a parallel analysis is also presented.

<sup>6</sup> Burés, J. Variable Time Normalization Analysis: General Graphical Elucidation of Reaction Orders from Concentration Profiles. *Angew. Chem. Int. Ed.* **2016**, *55*, 16084–16087.

### C. Different Excess Experiments

The initial concentrations used for the different excess experiments (Experiments 1–3) for the **1**-catalyzed reaction follow in Table S2.

**Table S2.** Concentrations for different excess experiments with catalyst **1**

| <b>Expt</b> | <b>[VCP]<sub>0</sub> (M)</b> | <b>[TBVE]<sub>0</sub> (M)</b> | <b>[1]<sub>T</sub> (mM)</b> |
|-------------|------------------------------|-------------------------------|-----------------------------|
| 1           | 0.05                         | 0.1                           | 2.5                         |
| 2           | 0.05                         | 0.2                           | 2.5                         |
| 3           | 0.075                        | 0.1                           | 2.5                         |

The [VCP] vs. time plots for experiments 1 and 2 overlay, indicating that increased [TBVE]<sub>0</sub> does not affect the reaction rate (Figure S2a). The variable time normalization analysis was also carried out, which shows that the plots overlay when the normalization assumes a zeroth-order rate dependence on [TBVE] (Figure S2b). The plots in which the normalization assumes a first-order rate dependence are also shown, and do not overlay (Figure S2c).

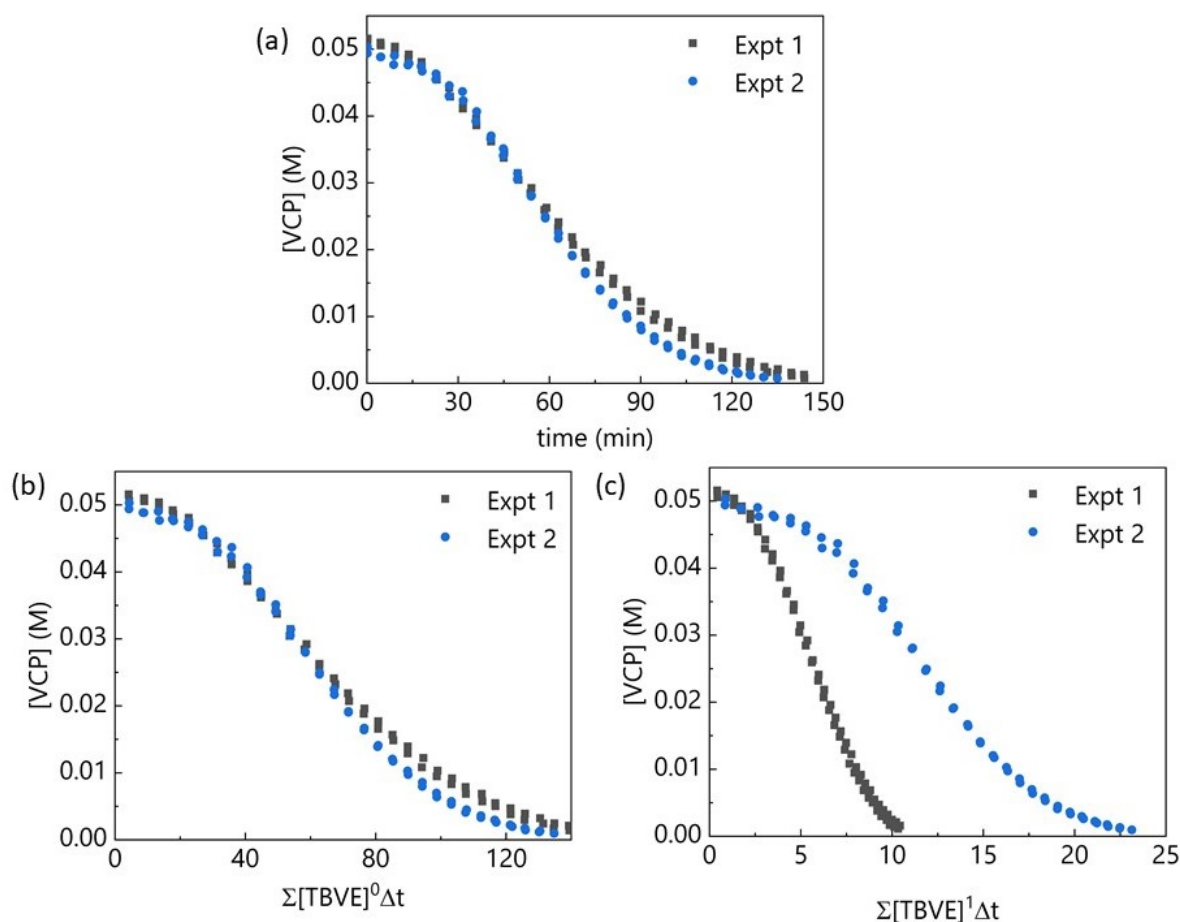

**Figure S2.** Different excess experiment maintaining  $[VCP]_0$  and changing  $[TBVE]_0$ . Duplicate experiments are simultaneously plotted and analyzed. (a) Raw concentration profiles (b) Variable time normalization analysis assuming zeroth-order dependence on  $[TBVE]$  (c) Variable time normalization analysis assuming first-order dependence on  $[TBVE]$ .

Analysis of experiments 1 and 3 reveals a half-order rate dependence on  $[VCP]$ , consistent with VCP ground state dimerization. These experiments have been time-adjusted to align the initial data points on the y-axis (Figure S3a and b).<sup>7</sup> Using the variable time normalization approach, overlay is achieved when a 0.5-order dependence of reaction rate on  $[VCP]$  is assumed (Figure S3c). The deterioration of overlap toward the end of the reaction could be consistent with a change in rate dependence on  $[VCP]$ , due to decreased VCP aggregation as the overall  $[VCP]$  also decreases. For comparison, we also present the plots that have been normalized assuming first-order dependence on  $[VCP]$ , which do not display overlap (Figure S3d).

<sup>7</sup> Baxter, R. D.; Sale, D.; Engle, K. M.; Yu, J.-Q.; Blackmond, D. G. Mechanistic Rationalization of Unusual Kinetics in Pd-Catalyzed C–H Olefination. *J. Am. Chem. Soc.* **2012**, *134*, 4600–4606.



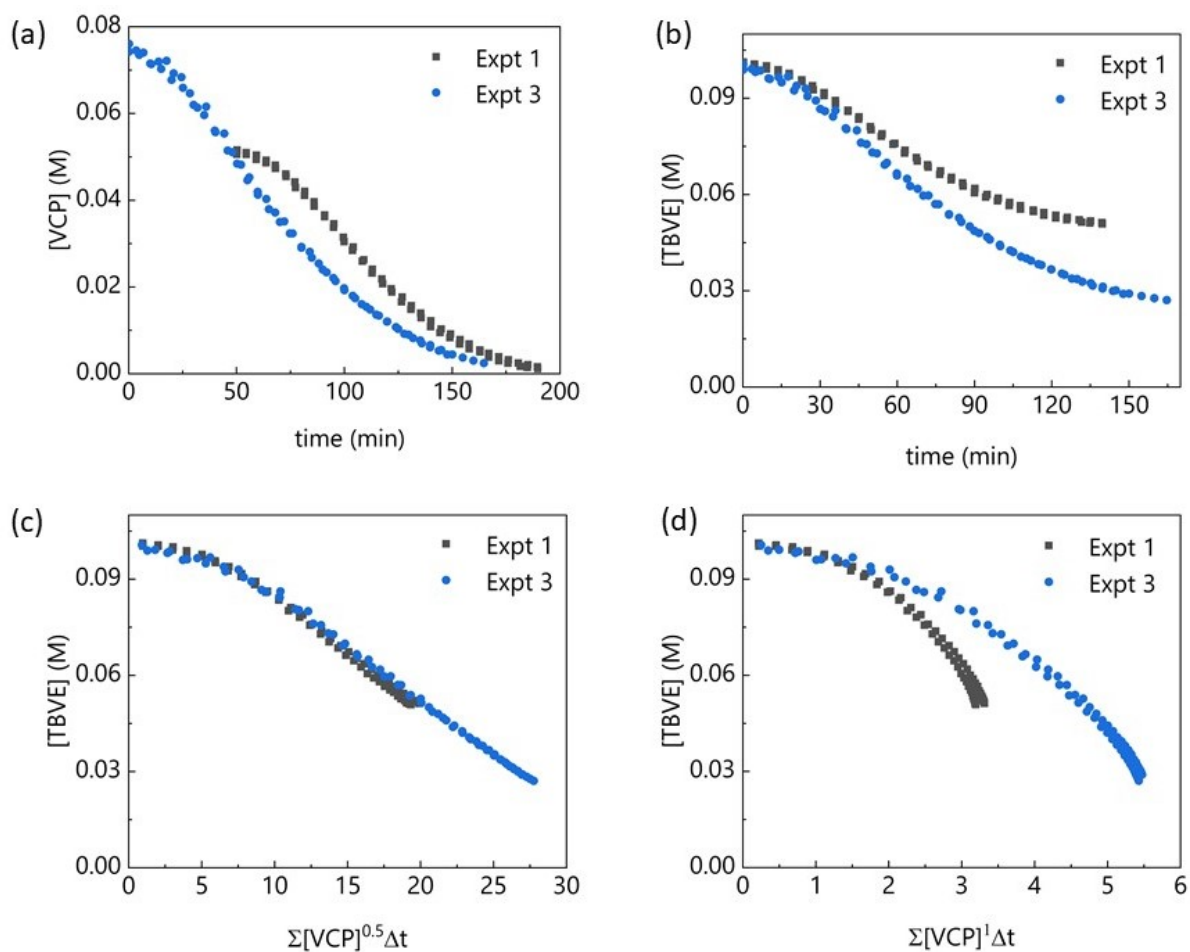

**Figure S3.** Different excess experiment maintaining  $[TBVE]_0$  and changing  $[VCP]_0$ . Duplicate experiments are simultaneously plotted in each graph. (a) Time-adjusted concentration profiles showing change in  $[VCP]$  over time. (b) Raw concentration profiles showing change in  $[TBVE]$  over time. (c) Variable time scale normalization assuming half-order rate dependence on  $[VCP]$ . (d) Variable time scale normalization assuming first-order rate dependence on  $[VCP]$ .

The kinetic order of VCP was also verified using the analysis outlined by Blackmond.<sup>8</sup> The reaction rate has already been established to be independent of [TBVE], so the rate equation for the reaction can be written as:

$$\text{rate} = \frac{d[\text{VCP}]}{dt} = k[\text{VCP}]^x$$

A plot of rate vs. [VCP]<sup>x</sup> should therefore display as a straight line. The raw temporal data can be represented as an empirically determined seventh-order polynomial:

$$[\text{VCP}] = a + bt + ct^2 + dt^3 + ft^4 + gt^5 + ht^6 + jt^7$$

Differentiation of this polynomial provides an equation describing rate as a function of time.

$$\frac{d[\text{VCP}]}{dt} = b + 2ct + 3dt^2 + 4ft^3 + 5gt^4 + 6ht^5 + 7jt^6$$

If the data are truncated to exclude the induction period, the remainder of the rate vs. [VCP]<sup>1/2</sup> plot looks to be linear, indicating that the reaction exhibits half-order kinetics with respect to [VCP], consistent with the conclusion obtained from the Burés analysis (Figure S4d). For comparison, both the full and truncated data sets are shown in Figure S4, along with the plots comparing first- and half-order dependence of rate on [VCP].

---

<sup>8</sup> (a) Blackmond, D. G. Reaction Progress Kinetic Analysis: A Powerful Methodology for Mechanistic Studies of Complex Catalytic Reactions. *Angew. Chem. Int. Ed.* **2005**, *44*, 4302–4320. (b) Mathew, J. S.; Klusmann, M.; Iwamura, H.; Valera, F.; Futran, A.; Emanuelsson, E. A. C.; Blackmond, D. G. Investigations of Pd-Catalyzed ArX Coupling Reactions Informed by Reaction Progress Kinetic Analysis. *J. Org. Chem.* **2006**, *71*, 4711–4716. (c) Blackmond, D. G. Kinetic Profiling of Catalytic Organic Reactions as a Mechanistic Tool. *J. Am. Chem. Soc.* **2015**, *137*, 10852–10866.

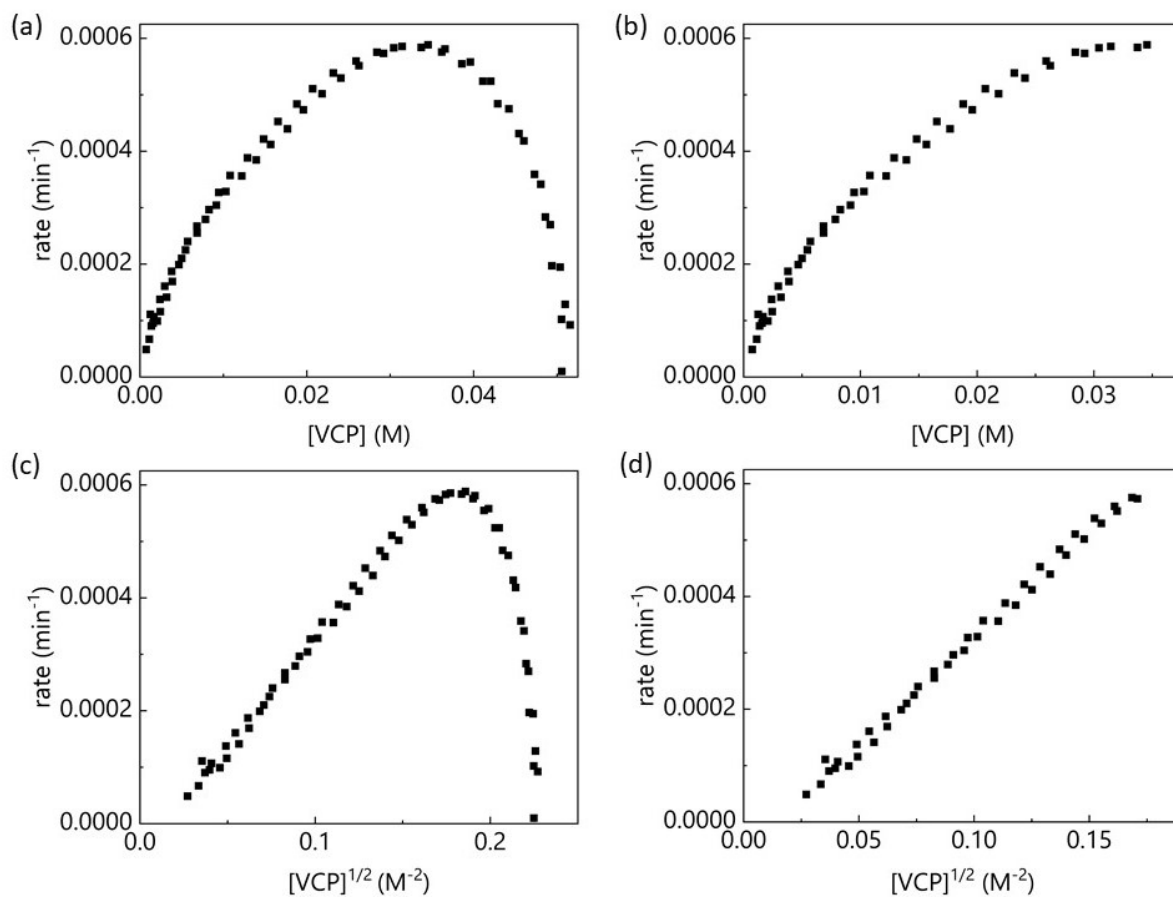

**Figure S4.** Data for experiment 1. Duplicate experiments are simultaneously plotted in each graph. (a) Rate vs. [VCP]. (b) Rate vs. [VCP], truncated to exclude induction period. (c) Rate vs. [VCP]<sup>1/2</sup>. (d) Rate vs. [VCP]<sup>1/2</sup>, truncated to exclude induction period.

We note that the data post-induction period also fit to the Michaelis–Menten equation (1) below, as shown in Figure S5.

$$rate = \frac{V_{max}[VCP]}{(K_m + [VCP])} \quad (1)$$

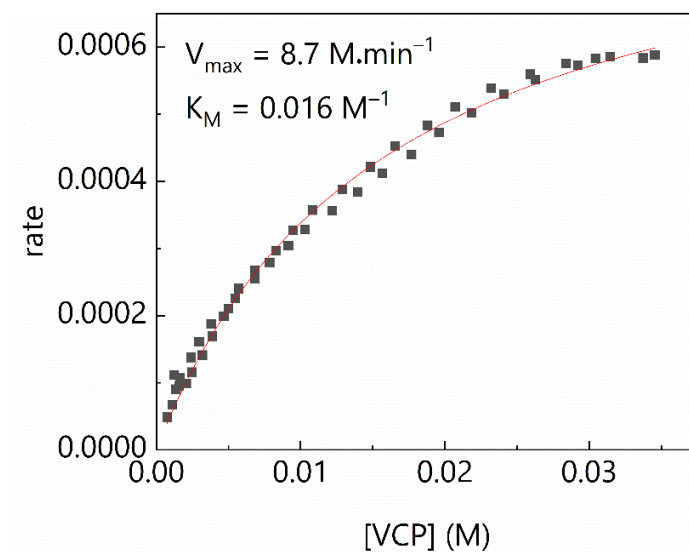

**Figure S5.** Data for experiment 1, truncated to exclude the induction period, fit to the Michaelis–Menten equation (1).

#### D. Catalyst Concentration Experiments

The concentrations used for experiments varying the concentration of catalyst **1** (Experiments 1, 4–10) follow in Table S3.

**Table S3.** Concentrations used to study effects of catalyst **1** concentration

| Expt | [VCP] <sub>0</sub> (M) | [TBVE] <sub>0</sub> (M) | [1] <sub>T</sub> (mM) |
|------|------------------------|-------------------------|-----------------------|
| 4    | 0.05                   | 0.1                     | 1.25                  |
| 5    | 0.05                   | 0.1                     | 1.62                  |
| 6    | 0.05                   | 0.1                     | 2.0                   |
| 1    | 0.05                   | 0.1                     | 2.5                   |
| 7    | 0.05                   | 0.1                     | 3.0                   |
| 8    | 0.05                   | 0.1                     | 3.5                   |
| 9    | 0.05                   | 0.1                     | 4.19                  |
| 10   | 0.05                   | 0.1                     | 4.85                  |

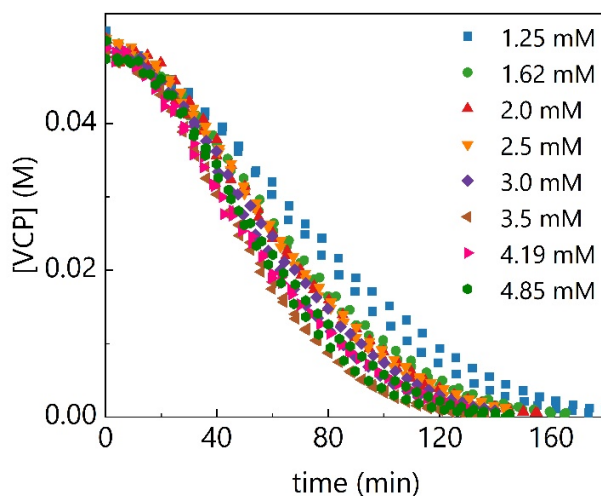

**Figure S6.** Raw concentration profiles with varying  $[1]_T$ . Legend indicates  $[1]$  for each experiment, corresponding to experiments 1, 4–10. Duplicate experiments are simultaneously plotted and analyzed.

Given the induction period, we chose the maximum rate for each experiment as the point of comparison. These data are obtained from differentiation of the  $[VCP]$  vs. time data, which introduces some noisiness to the data. However, a general trend emerges in which the maximum rate increases with increasing  $[1]_T$  until  $[1]_T = 3.5$  mM, after which the maximum rate decreases (Figure S7). This is consistent with changing catalyst order as  $[1]_T$  changes.

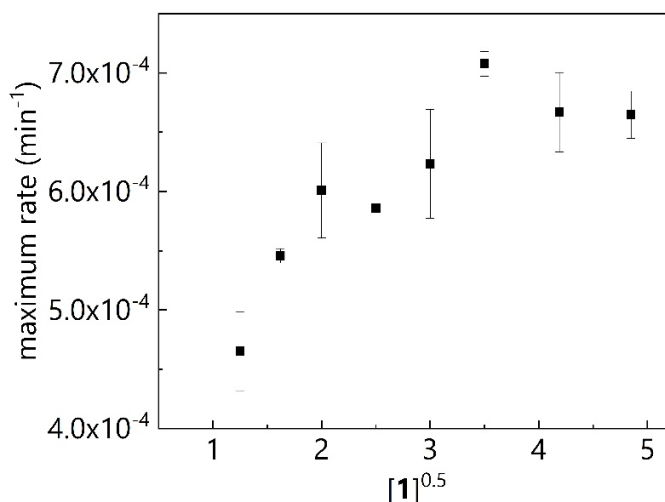

**Figure S7.** Effect of  $[1]_T$  on maximum rate of reaction. Error bars represent the standard deviation of two averaged runs.

We further attempted to quantify this trend by carrying out the normalized time scale method reported by Burés.<sup>9</sup> The changes resulting from these normalizations are small, so multiple plots are shown here to justify our subjective analysis as to what qualifies as “overlay.”

At lower  $[1]_T$ , the data overlay when the catalyst order is assumed to be 0.5, consistent with a ground state dimer (Figure S8a). For comparison, the plots generated when catalyst order is assumed to be 1 are shown (Figure S8b). At higher  $[1]_T$ , the overlay improves as the hypothetical catalyst order is decreased, indicating that the catalyst is likely highly aggregated in solution (Figure S8c). In contrast, at higher  $[1]_T$  a time scale normalization assuming 0.5 order in  $[1]$  does not provide overlay (Figure S8d).

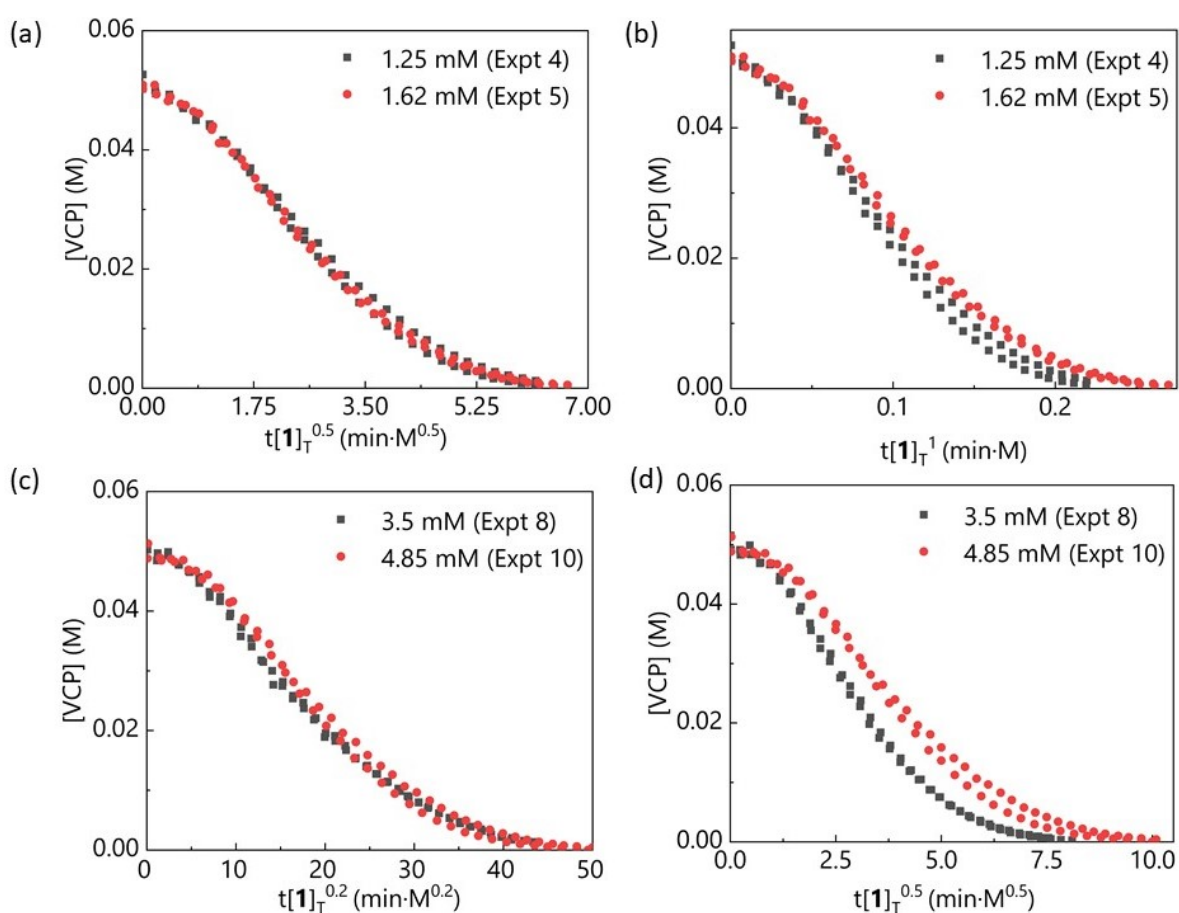

**Figure S8.** Variable time scale normalization for different regimes of  $[1]_T$ . Duplicate experiments are simultaneously plotted and analyzed. Legend indicates  $[1]$  for each experiment (a) Low  $[1]_T$ , assuming 0.5 order in  $[1]$ . (b) Low  $[1]_T$ , assuming first-order in  $[1]$ . (c) High  $[1]_T$ , assuming 0.2 order in  $[1]$ . (d) High  $[1]_T$ , assuming 0.5 order in  $[1]$ .

<sup>9</sup> Burés, J. A Simple Graphical Method to Determine the Order in Catalyst. *Angew. Chem. Int. Ed.* **2016**, *55*, 2028–2021. (b)

### E. Same Excess Experiments

The concentrations used for the same excess experiments for the **1**-catalyzed reaction experiments (1, 11–12) follow in Table S4.

**Table S4.** Concentrations for same excess experiments with catalyst **1**

| Expt | [VCP] <sub>0</sub> (M) | [TBVE] <sub>0</sub> (M) | [ <b>1</b> ] <sub>T</sub> (mM) | [P] <sub>added</sub> (M) |
|------|------------------------|-------------------------|--------------------------------|--------------------------|
| 1    | 0.05                   | 0.1                     | 2.5                            | 0                        |
| 11   | 0.035                  | 0.085                   | 2.5                            | 0                        |
| 12   | 0.035                  | 0.085                   | 2.5                            | 0.015                    |

The [VCP]<sub>0</sub> and [TBVE]<sub>0</sub> used in experiment 11 are identical to the reaction concentrations of experiment 1 after the reaction proceeds to 30% conversion. Due to the induction period, the data are not expected to overlay at the beginning of the reaction, irrespective of possible product inhibition or catalyst degradation. For this analysis, only the data obtained in the post-induction period are compared. For experiment 1, the first data point post-induction period is defined as  $t = 0$ , and the data for experiment 4 are time-adjusted accordingly such that the experiments align at the appropriate [VCP] on the y-axis. Experiments 1 and 11 do not exhibit overlay, with experiment 11 exhibiting an overall slower reaction rate relative to experiment 1 (Figure S9). This is inconsistent with catalyst degradation or product inhibition. Possible explanations for this rate difference are (i) catalyst activation by TBVE, (ii) catalyst activation by product, or (iii) catalyst activation by VCP. The fact that the reaction exhibits a zeroth order dependence on [TBVE] eliminates possibility (i). To determine whether the product is activating the catalyst, a third experiment was performed (experiment 12), in which product—equal to the amount formed after 30% conversion—was added to the reaction (added product is 74:26 *trans:cis*, 76% ee *trans*, 55% ee *cis*). Experiments 11 and 12 overlay, indicating that the product does not affect the overall reaction rate and hypothesis (ii) is also not operative. Thus, we conclude that [VCP]<sub>0</sub> affects the overall reaction rate, either through H-bonding that disrupts catalyst aggregation, or simply through the ring-opening reaction that necessarily interferes with recombination of the thiyl radicals.

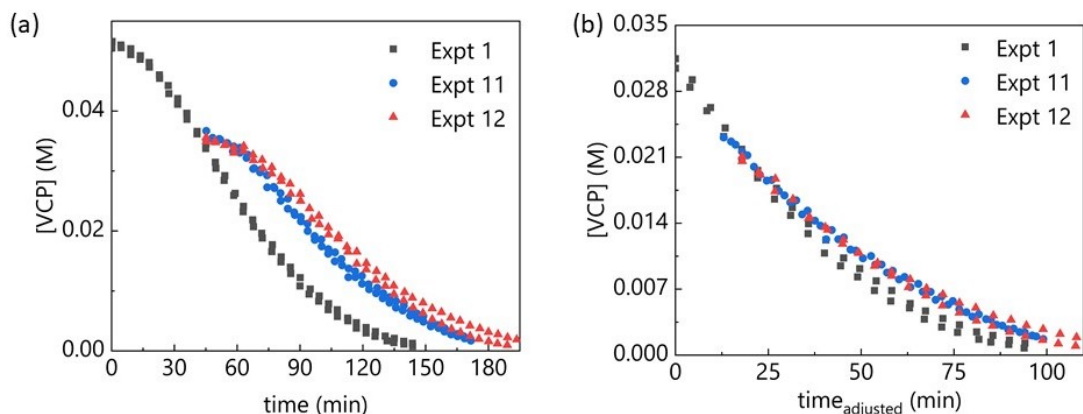

**Figure S9.** Same excess experiments. Duplicate experiments are simultaneously plotted and analyzed. (a) Raw concentration profiles. (b) Concentration profiles, truncated and time-adjusted to exclude the induction period.

We also observed that the maximum rate occurs consistently at 30% conversion, as opposed to a specific time or [VCP]. Data illustrating this phenomenon are shown below (Figure S10).

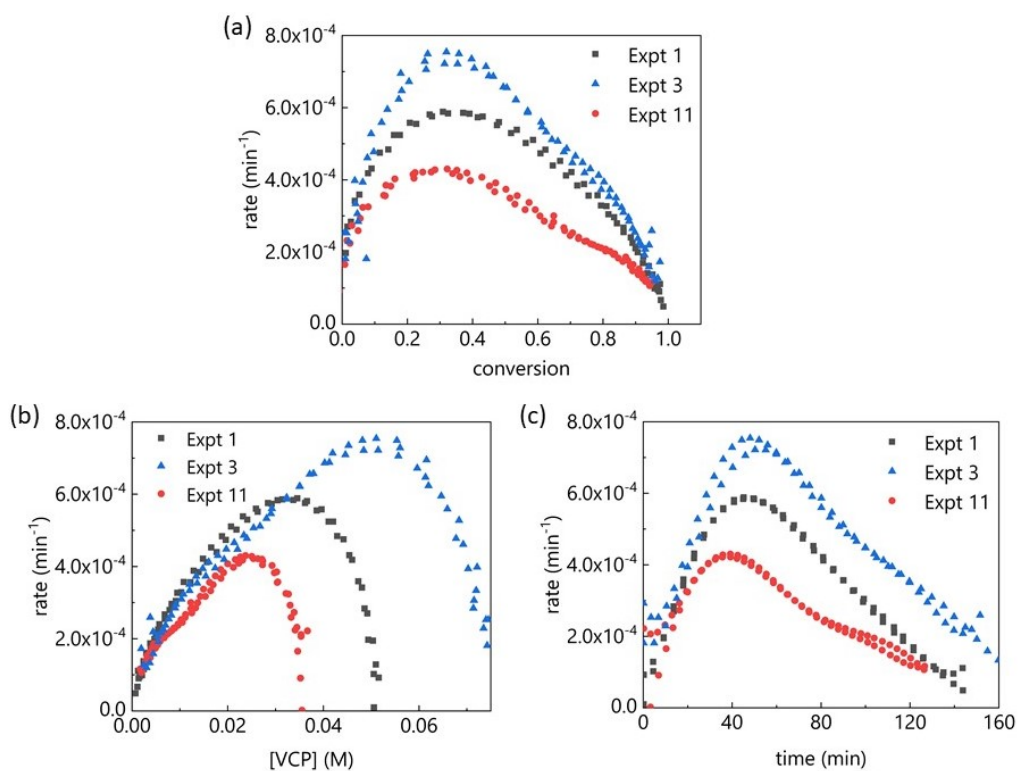

**Figure S10.** A comparison of rate data plotted (a) against conversion; (b) against [VCP]; (c) against time.



### F. Experiments Using *n*-Butyl Disulfide as Catalyst

The concentrations used in the experiments for the  $(n\text{BuS})_2$ -catalyzed reaction (Experiments 13–16) follow in Table S5.

**Table S5.** Concentrations for all experiments catalyzed by *n*-butyl disulfide

| Expt | [VCP] <sub>0</sub> (M) | [TBVE] <sub>0</sub> (M) | [( <i>n</i> BuS) <sub>2</sub> ] <sub>T</sub> (mM) |
|------|------------------------|-------------------------|---------------------------------------------------|
| 13   | 0.05                   | 0.1                     | 2.5                                               |
| 14   | 0.05                   | 0.2                     | 2.5                                               |
| 15   | 0.05                   | 0.1                     | 4.0                                               |
| 16   | 0.035                  | 0.085                   | 2.5                                               |

The data generated from these experiments are shown in the plots below (Figure S11). Experiments 13 and 14 demonstrate that the concentration of TBVE still has no effect on the rate of reaction, indicating that the rate-determining step is likely the same when *n*-butyl disulfide is used as the catalyst (Figure S11b and c). For comparison, the plots obtained when the reaction is assumed to be first-order in TBVE are shown, which do not display overlay (Figure S11d). Experiments 13 and 15 show overlay only when the reaction is assumed to be half-order in catalyst (Figure S11e). Under the same conditions with the full peptide catalyst, aggregation effects are observed. No such effects are observed with the simple disulfide catalyst, indicating that the peptide structure is responsible for catalyst aggregation, ostensibly due to H-bonding between the peptide backbones. Overlay between the plots generated from the “same-excess experiment” (experiments 13 and 16) is observed, indicating that the product “activation” observed with the full peptide catalyst is a function of the peptide backbone (again, ostensibly through H-bonding interactions) (Figure S11f).

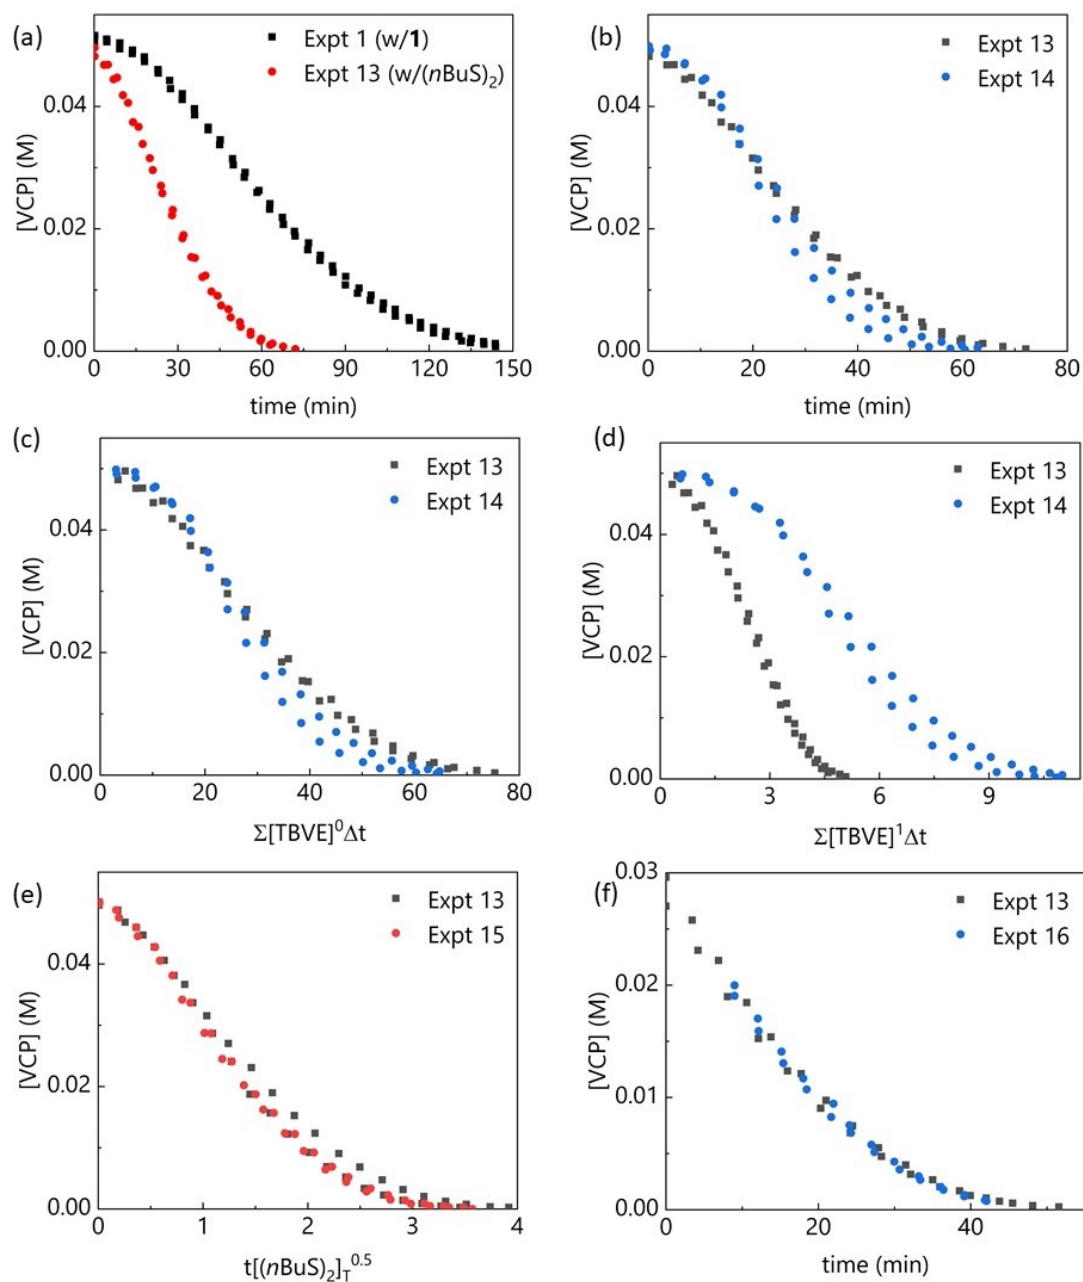

**Figure S11.** Kinetic analysis of (nBuS)<sub>2</sub>-catalyzed reaction. (a) Raw concentration profiles comparing the 1-catalyzed reaction and the (nBuS)<sub>2</sub>-catalyzed reaction. (b) Raw concentration profiles for the different excess experiment maintaining [VCP]<sub>0</sub> and changing [TBVE]<sub>0</sub>. (c) Variable time normalization analysis for different excess experiment, assuming zeroth-order dependence on [TBVE]. (d) Variable time normalization analysis for different excess experiment, assuming first-order dependence on [TBVE]. (e) Variable time normalization analysis for catalyst concentration experiment, assuming 0.5 order in  $[(n\text{BuS})_2]_T$ . (f) Raw concentration profiles for the same excess experiment.

### G. Further Investigation of Induction Period

We attempted to account for the induction period by assuming irreversible homolysis of the catalyst analogous to the analysis reported by Blackmond and coworkers, fitting the entirety of the reaction data to equation 2.<sup>10</sup> However, this fails to provide a consistent fit across a range of [VCP]<sub>0</sub>: [TBVE]<sub>0</sub> ratios, indicating that the data are not consistent with this model (Figure S12).

$$\text{rate} = \frac{V_{\max}(1 - e^{-k_{\text{diss}}t})[\text{VCP}][\text{TBVE}]}{K_m + [\text{VCP}]} \quad (2)$$

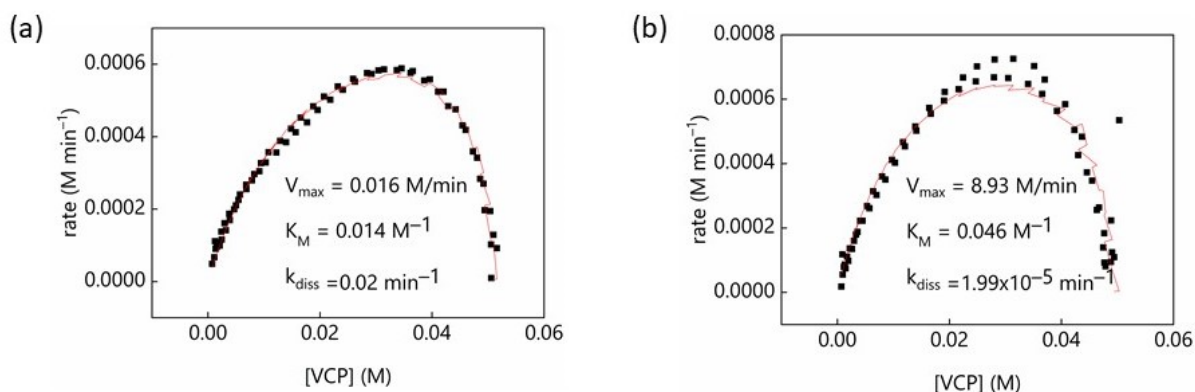

**Figure S12.** (a) Data from Experiment 1, fit to equation 2. (b) Data from Experiment 2, fit to equation 2. Duplicate experiments are simultaneously plotted and analyzed. The red line represents the smoothed (Lowess) best fit to Equation 2.

### H. Experiments Using Enantiopure VCP

The comparisons between (±)-VCP, (*R*)-VCP, and (*S*)-VCP were carried out using the standard reaction conditions ([VCP]<sub>0</sub> = 0.05 M, [TBVE]<sub>0</sub> = 0.1 M, [cat]<sub>T</sub> = 2.5 mM). These data are illustrated in Figure S13. Specific concentrations for the different and same excess experiments follow in Table S6.

<sup>10</sup> Rosner, T.; Pfaltz, A.; Blackmond, D. G. Observation of Unusual Kinetics in Heck Reactions of Aryl Halides: The Role of Non-Steady-State Catalyst Concentration. *J. Am. Chem. Soc.* **2001**, *123*, 4621–4622.

**Table S6.** Concentrations for all **1**-catalyzed experiments using enantiopure VCP

| Expt | [S-VCP] <sub>0</sub> (M) | [TBVE] <sub>0</sub> (M) | [ <b>1</b> ] <sub>T</sub> (mM) |
|------|--------------------------|-------------------------|--------------------------------|
| 17   | 0.05                     | 0.1                     | 2.5                            |
| 18   | 0.05                     | 0.2                     | 2.5                            |
| 19   | 0.035                    | 0.085                   | 2.5                            |
| Expt | [R-VCP] <sub>0</sub> (M) | [TBVE] <sub>0</sub> (M) | [ <b>1</b> ] <sub>T</sub> (mM) |
| 20   | 0.05                     | 0.1                     | 2.5                            |
| 21   | 0.05                     | 0.2                     | 2.5                            |
| 22   | 0.035                    | 0.085                   | 2.5                            |

The following [VCP] vs. time plots were generated. Qualitative examination of the plots indicates that (*R*)-VCP reacts at a faster rate than (*S*)-VCP, and both react at faster rates than the racemic VCP (Figure S13a). Quantitatively, relative rate constants were determined by comparing the maximum rates for each reaction (Figure S11b). The data used to calculate the relative rate constants, as well as the rate constants themselves, are shown in Table 7.

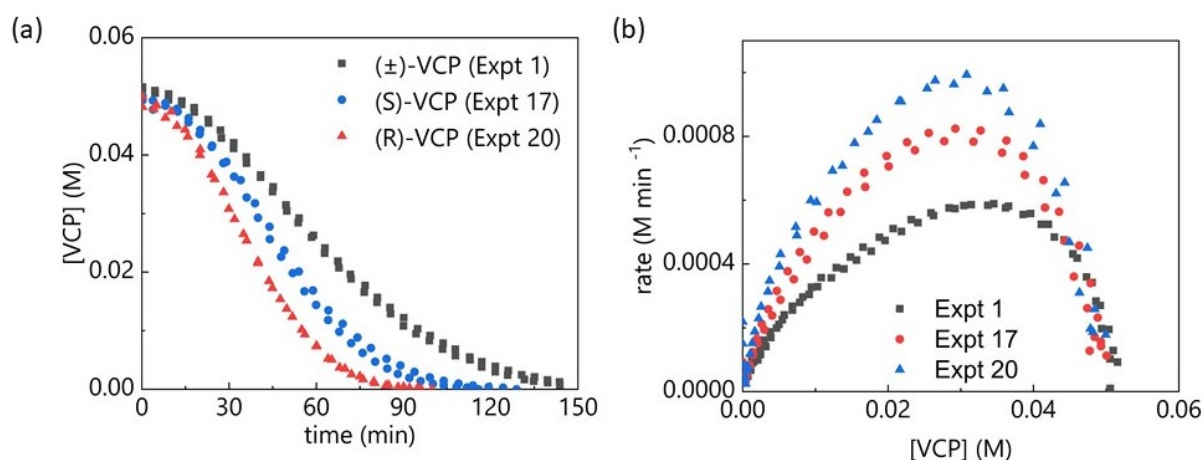

**Figure S13.** (a) Raw concentration profiles obtained from the **1**-catalyzed reaction, comparing racemic, (*S*)-, and (*R*)-VCP. Duplicate experiments are simultaneously plotted and analyzed. (b) Rate vs. concentration profiles obtained from the **1**-catalyzed reaction, comparing racemic, (*S*)-, and (*R*)-VCP.

These data can also be fit to equation 1 (post-induction period) (Figure S14).

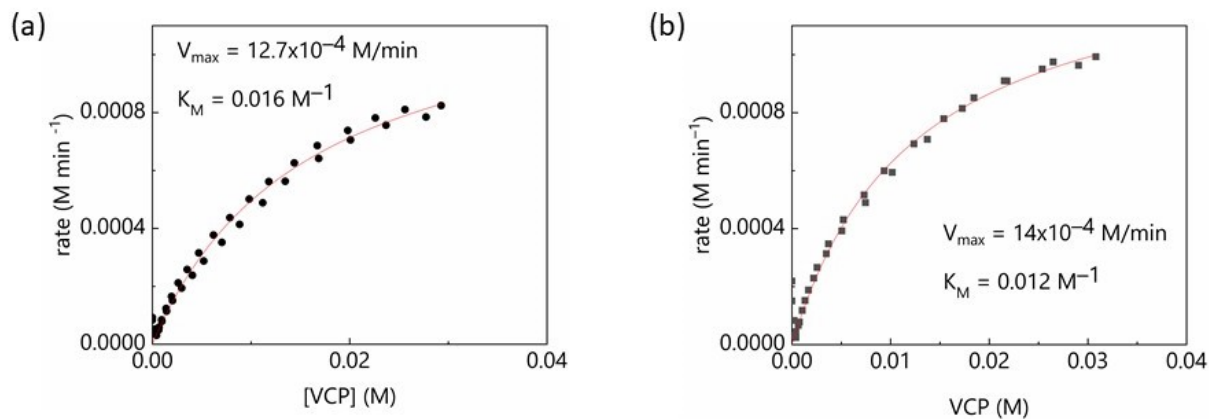

**Figure S14.** (a) Data for experiment 17, fit to equation 1. (b) Data for experiment 20, fit to equation 1.

**Table S7.** Determination of relative rates for reactions of racemic and enantiopure VCP

| Expt            | Rate (Run 1)<br>( $\text{M min}^{-1}$ ) | Rate (Run 2)<br>( $\text{M min}^{-1}$ ) | Average Rate<br>( $\text{M min}^{-1}$ ) | $k_{\text{rel}}$ |
|-----------------|-----------------------------------------|-----------------------------------------|-----------------------------------------|------------------|
| 1 ( $\pm$ -VCP) | $5.88417 \times 10^{-4}$                | $5.83734 \times 10^{-4}$                | $5.84076 \times 10^{-4}$                | 1                |
| 17 (S-VCP)      | $7.84502 \times 10^{-4}$                | $8.24279 \times 10^{-4}$                | $8.04391 \times 10^{-4}$                | 1.4              |
| 20 (R-VCP)      | $9.92924 \times 10^{-4}$                | $9.63159 \times 10^{-4}$                | $9.78042 \times 10^{-4}$                | 1.7              |

The different excess experiments (S-VCP, experiments 17 and 18; R-VCP, experiments 20 and 21) indicate that these reactions are also zeroth-order in TBVE when enantiopure starting material is used, thus there is likely no change in rate-determining step for these reactions (Figure S15).

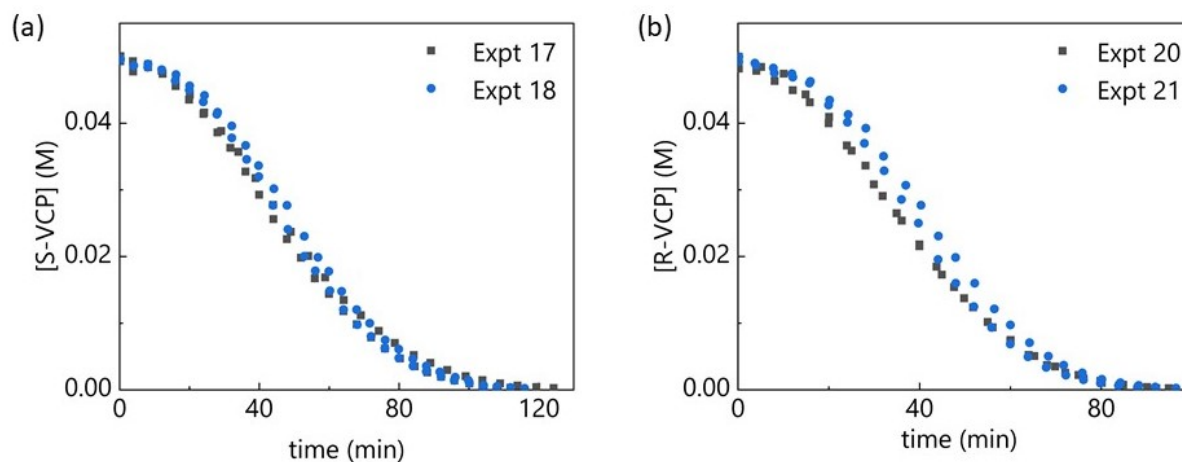

**Figure S15.** Different excess experiments using enantiopure VCP. Duplicate experiments are simultaneously plotted and analyzed. (a) Experiment with (*S*)-VCP. (b) Experiment with (*R*)-VCP.

The plots corresponding to the same excess experiments for both (*S*)- and (*R*)-VCP appear to show better, though imperfect, overlay than the same excess plot generated using racemic VCP (Figure S9b), which we interpreted as not displaying overlay. Any interpretation of these apparent differences is tenuous, though we suggest that this could result from differences in aggregation behavior related to the chirality of the dimers (or oligomers).

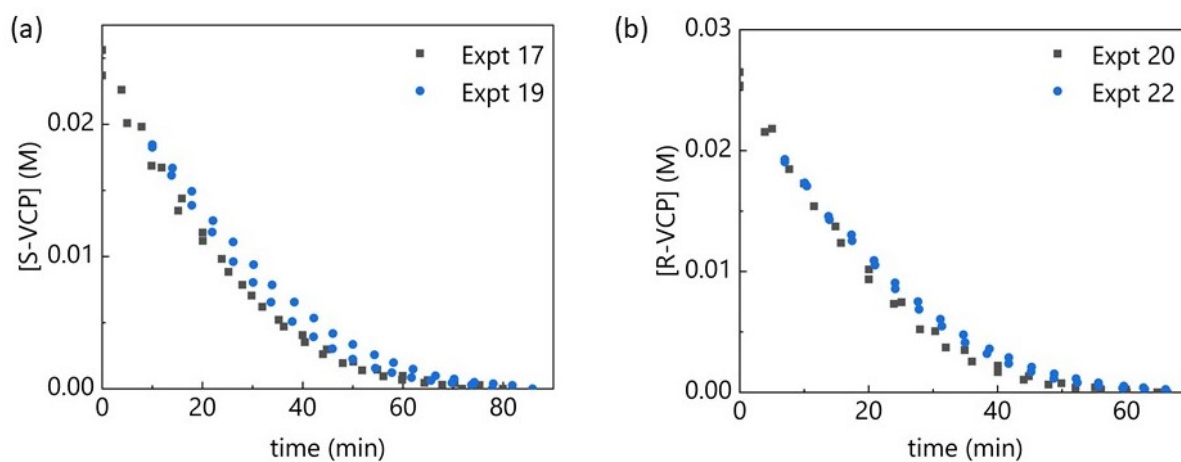

**Figure S16.** Same excess experiments using enantiopure VCP. Duplicate experiments are simultaneously plotted and analyzed. (a) Experiment with (*S*)-VCP. (b) Experiment with (*R*)-VCP.

### I. Experiments Using Unsubstituted Catalyst

The comparisons between catalysts **1** and **2** were carried out using the standard reaction conditions ( $[\text{VCP}]_0 = 0.05 \text{ M}$ ,  $[\text{TBVE}]_0 = 0.1 \text{ M}$ ,  $[\text{cat}]_T = 2.5 \text{ mM}$ ). Specific concentrations for the different and same excess experiments follow in Table S8.

**Table S8.** Concentrations for all **2**-catalyzed experiments using racemic VCP

| Expt | $[\text{VCP}]_0 \text{ (M)}$ | $[\text{TBVE}]_0 \text{ (M)}$ | $[\mathbf{2}]_T \text{ (mM)}$ |
|------|------------------------------|-------------------------------|-------------------------------|
| 23   | 0.05                         | 0.1                           | 2.5                           |
| 24   | 0.05                         | 0.2                           | 2.5                           |
| 25   | 0.035                        | 0.085                         | 2.5                           |

A comparison between catalysts **1** and **2** illustrates that catalyst **1**, bearing the 4-proline substituent, catalyzes the reaction at a qualitatively faster rate than catalyst **2** (Figure S17a). The **2**-catalyzed reaction also appears to stall midway through the reaction, before proceeding to completion. This behavior precluded a quantitative comparison between the two catalysts, and we did not investigate this phenomenon further. The different excess experiment is also difficult to interpret due to the aforementioned stalling, but seems to be consistent with a scenario that is zeroth-order in TBVE, and we thus assume that there is no change in rate-determining step for the **2**-catalyzed reaction (Figure S17b). The same excess experiment does not result in overlay, consistent with the catalyst activation hypothesis proposed for the **1**-catalyzed reaction (Figure S17c and d).

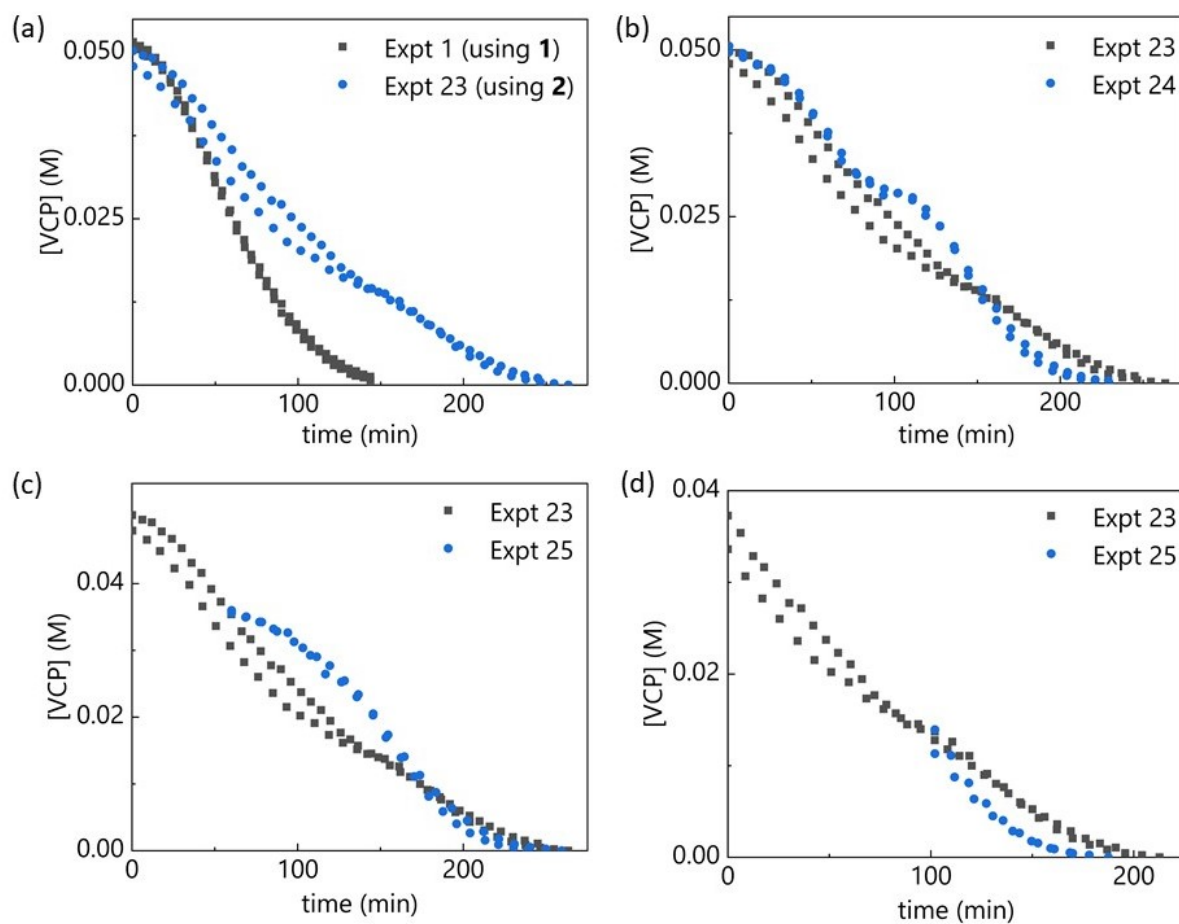

**Figure S17.** Data for the **2**-catalyzed reaction using racemic VCP. Duplicate experiments are simultaneously plotted and analyzed. (a) Raw concentration profile comparing catalysts **1** and **2**. (b) Different excess experiment. (c) Same excess experiment, raw data. (d) Same excess experiment, time-adjusted and truncated to remove the induction period.



### J. Experiments Using Unsubstituted Catalyst and Enantiopure VCP

The comparisons between ( $\pm$ )-VCP, (*R*)-VCP, and (*S*)-VCP using the unsubstituted catalyst were carried out using the standard reaction conditions ( $[\text{VCP}]_0 = 0.05 \text{ M}$ ,  $[\text{TBVE}]_0 = 0.1 \text{ M}$ ,  $[\text{cat}]_{\text{T}} = 2.5 \text{ mM}$ ). Specific concentrations for each experiment follow in Table S9.

**Table S9.** Concentrations for all **2**-catalyzed experiments using enantiopure VCP

| Expt | [ <i>R</i> -VCP] <sub>0</sub> (M) | [TBVE] <sub>0</sub> (M) | [ <b>2</b> ] <sub>T</sub> (mM) |
|------|-----------------------------------|-------------------------|--------------------------------|
| 26   | 0.05                              | 0.1                     | 2.5                            |
| Expt | [ <i>S</i> -VCP] <sub>0</sub> (M) | [TBVE] <sub>0</sub> (M) | [ <b>2</b> ] <sub>T</sub> (mM) |
| 27   | 0.05                              | 0.1                     | 2.5                            |

As shown in Figure S18, as in the **1**-catalyzed reaction, (*R*)-VCP also reacts at the fastest rate in the **2**-catalyzed reaction, followed by (*S*)-VCP and then racemic VCP.

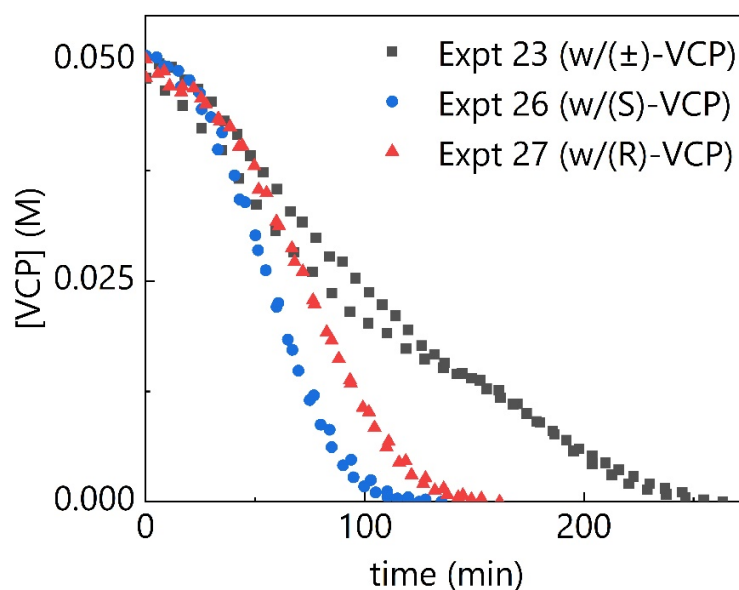

**Figure S18.** Raw concentration profiles obtained from the **2**-catalyzed reaction, comparing racemic, (*S*)-, and (*R*)-VCP. Duplicate experiments are simultaneously plotted and analyzed.

### III. Synthesis of Enantiopure Vinylcyclopropanes

**S-7** and **R-7** were accessed from (*S*)- and (*R*)-solketal through an adaptation of the methods reported in the literature.<sup>11–13</sup> A representative procedure for the synthesis of **S-7** is shown below.

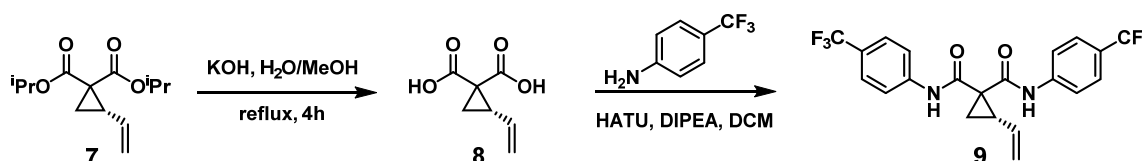

#### (*S*)-2-vinylcyclopropane-1,1-dicarboxylic acid (**S-8**)

**S-7** (6.1 g, 25.3 mmol, 1.0 equiv.) was dissolved in water (12.7 mL) and methanol (12.7 mL). Solid potassium hydroxide (5.7 g, 102 mmol, 4.0 equiv.) was added and the reaction mixture was stirred at 50 °C for 5 h. The reaction mixture was transferred to a separatory funnel, rinsing with water, and was acidified with HCl to pH < 2. The reaction mixture was extracted with ethyl acetate and the organic phase was washed with brine. The aqueous phase was back-extracted with ethyl acetate, and the combined organic phases were dried over MgSO<sub>4</sub>, filtered, and concentrated *in vacuo* to afford **S-8** as a colorless oil which was used in the subsequent reaction without further purification.

#### (*S*)-*N,N'*-bis(4-(trifluoromethyl)phenyl)-2-vinylcyclopropane-1,1-dicarboxamide (**S-9**)

**S-8** was dissolved in DCM (63 mL), and HATU (21.1 g, 56 mmol, 2.2 equiv.) was added, followed by DIPEA (11.0 mL, 63 mmol, 2.5 equiv.). 4-Trifluoromethylaniline (7.0 mL, 56 mmol, 2.2 equiv.) was added and the reaction mixture was stirred at rt overnight. The reaction mixture was transferred to a separatory funnel and was diluted with DCM and washed with 1 N HCl, sat. aqueous sodium bicarbonate, and brine. The organic phase was dried over Na<sub>2</sub>SO<sub>4</sub>, filtered, and concentrated *in vacuo*. The crude **S-9** was purified by silica gel column chromatography (5→25% ethyl acetate, hexanes). The semi-crude **S-9** was further purified by reversed-phase column chromatography on a Biotage Isolera One purification system (SNAP C18 120 g column; gradient = Ramp 20–100% MeCN/H<sub>2</sub>O with 0.1% formic acid over 15 column volumes (CV), then 3 CV 100% MeCN with 0.1% formic acid; 75 mL/min flow rate; monitored λ = 210, 245 nm; 16 x 150 mm test tubes with 20 mL fractions). Fractions containing product were pooled and concentrated *in vacuo* to provide pure **S-9** as a white solid. Optical rotations were recorded on a Perkin Elmer Polarimeter 341 at the sodium D line (1.0 dm path length) at 20 °C, and determined to be [α]<sub>D</sub><sup>20</sup> =

<sup>11</sup> Brard, M.; Lainé, C.; Réthoré, I. L.; Neveu, C.; Lemiègre, L.; Benvegna, T. Synthesis of Archaeal Bipolar Lipid Analogues: A Way to Versatile Drug/Gene Delivery Systems. *J. Org. Chem.* **2007**, *72*, 8267–8279.

<sup>12</sup> Burgess, K.; Ho, K.-K.; Ke, C.-Y. Synthesis of a Valuable Cyclopropyl Chiron for Preparations of 2,3-Methanoamino Acids. *J. Org. Chem.* **1993**, *58*, 3767–3768.

<sup>13</sup> Carson, C. A.; Kerr, M. A. Total Synthesis of (+)-Phyllanthidine. *Angew. Chem. Int. Ed.* **2006**, *45*, 6560–6563.

$-38.2^\circ$  ( $c = 0.01$  g/mL,  $\text{CHCl}_3$ ). All other spectral data matches that obtained for the racemic compound.<sup>2</sup>

### (*R*)-2-vinylcyclopropane-1,1-dicarboxylic acid (**R-8**)

Synthesized by the same procedure as **S-8** using **R-7** (3.7 g, 15.4 mmol, 1.0 equiv.), water (7.7 mL), methanol (7.7 mL), and solid potassium hydroxide (3.5 g, 62 mmol, 4.0 equiv.) to afford **R-8** as a colorless oil which was used in the subsequent reaction without further purification.

### (*R*)-*N,N'*-bis(4-(trifluoromethyl)phenyl)-2-vinylcyclopropane-1,1-dicarboxamide (**R-9**)

Synthesized by the same procedure as **S-9** using **R-8**, DCM (38.5 mL), HATU (12.9 g, 34 mmol, 2.2 equiv.), DIPEA (6.7 mL, 39 mmol, 2.5 equiv.), and 4-trifluoromethylaniline (4.3 mL, 34 mmol, 2.2 equiv.) to afford **S-9** as a white solid.  $[\alpha]_D^{20} = +37.1^\circ$  ( $c = 0.01$  g/mL,  $\text{CHCl}_3$ ). All other spectral data matches that obtained for the racemic compound.<sup>2</sup>

## IV. Vinylcyclopropane Binding Studies by NMR Titration

We performed NMR dilution experiments to investigate our hypothesis on the dimerization behavior of VCP in solution. In particular, we measured the shift of an amide N–H proton in  $\text{THF-}d_8$  solutions of various VCP concentrations at constant temperature.<sup>14</sup>

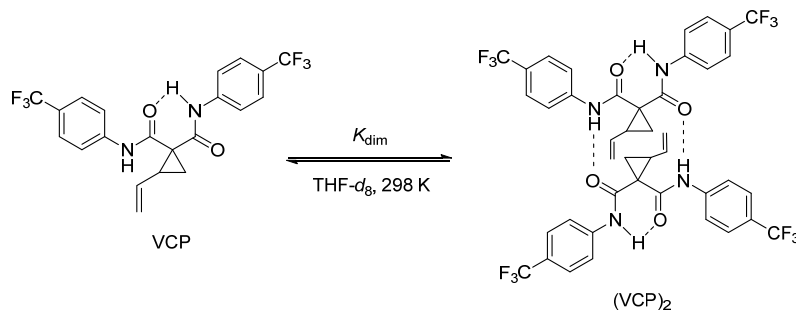

**Scheme S1.** Proposed dimerization equilibrium for VCP.

### A. General Procedure

For each production run across a concentration range, a stock solution of racemic or (*R*)-VCP at an appropriate concentration in  $\text{THF-}d_8$  was prepared in a 1.00 mL volumetric flask. Each sample was prepared by diluting the appropriate amount of stock solution to 500  $\mu\text{L}$  with  $\text{THF-}d_8$  in a 5 mm Wilmad NMR tube using a gastight Hamilton<sup>®</sup> syringe.  $^1\text{H}$  NMR spectra were recorded on a 500 MHz Agilent spectrometer. Samples were equilibrated in the spectrometer at  $25^\circ\text{C}$  for

<sup>14</sup> (a) Wilcox, C. S., *Frontiers in Supramolecular Organic Chemistry and Photochemistry*, VCH Weinheim: New York, 1991; (b) Horman, I.; Dreux, B., Estimation of association constants of biomolecular organic complexes. *Anal. Chem.* **1983**, 55 (8), 1219-1221.

100 s before acquisition. Proton chemical shifts are reported in ppm ( $\delta$ ) and referenced to residual solvent (THF- $d_8$ ,  $\delta$  3.58 ppm).<sup>15</sup> The lower-field amide N–H proton with  $\delta \approx 9.7$  ppm was chosen for all runs.

## B. Binding Studies with Racemic VCP

### Run 1: 0.05 mM to 5 mM

Samples were prepared from a 10 mM stock solution of VCP in THF- $d_8$ . The data are shown in Table S10 and plotted in Figure S19.

**Table S10.** Measured amide proton shifts for racemic VCP at concentrations from 0.05 mM to 5 mM.

| [VCP]<br>(mM)               | 0.05  | 0.075 | 0.10  | 0.25  | 0.50  | 1.0   | 1.5   | 2.5   | 5.0   |
|-----------------------------|-------|-------|-------|-------|-------|-------|-------|-------|-------|
| $\delta_{\text{N-H}}$ (ppm) | 9.712 | 9.710 | 9.709 | 9.710 | 9.710 | 9.711 | 9.710 | 9.711 | 9.711 |

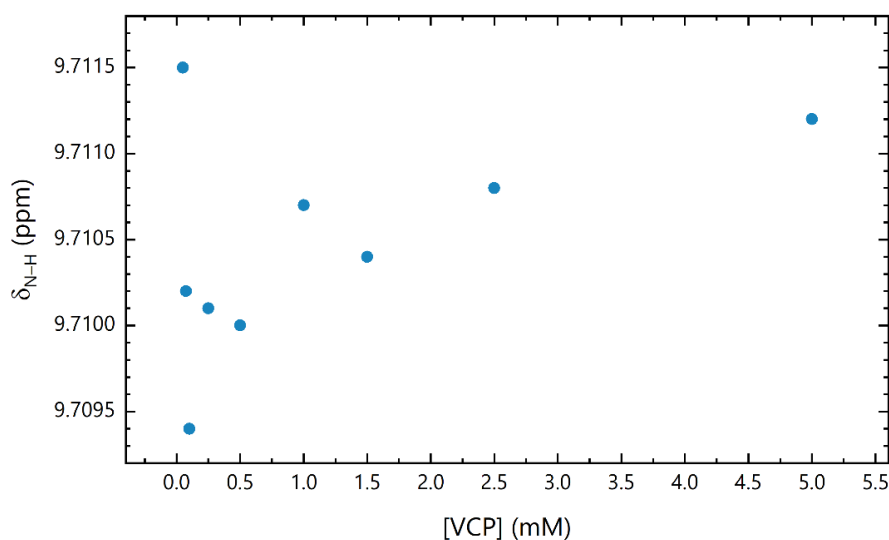

**Figure S19.** Measured amide proton shifts for racemic VCP at concentrations from 0.05 mM to 5 mM.

### Run 2: 50 mM to 1000 mM

<sup>15</sup> Fulmer, G. R.; Miller, A. J. M.; Sherden, N. H.; Gottlieb, H. E.; Nudelman, A.; Stoltz, B. M.; Bercaw, J. E.; Goldberg, K. I., NMR Chemical Shifts of Trace Impurities: Common Laboratory Solvents, Organics, and Gases in Deuterated Solvents Relevant to the Organometallic Chemist. *Organometallics* **2010**, 29 (9), 2176-2179.

Samples were prepared from a 1000 mM stock solution of VCP in THF-*d*<sub>8</sub>. The data are shown in Table S11 and plotted in Figure S20.

**Table S11.** Measured amide proton shifts for racemic VCP at concentrations from 50 mM to 1000 mM.

| [VCP]<br>(mM)                  | 50    | 100   | 140   | 200   | 250   | 300   | 500   | 600   | 700   | 800   | 900   | 1000  |
|--------------------------------|-------|-------|-------|-------|-------|-------|-------|-------|-------|-------|-------|-------|
| $\delta_{\text{N-H}}$<br>(ppm) | 9.716 | 9.722 | 9.724 | 9.730 | 9.732 | 9.738 | 9.758 | 9.781 | 9.761 | 9.785 | 9.798 | 9.806 |

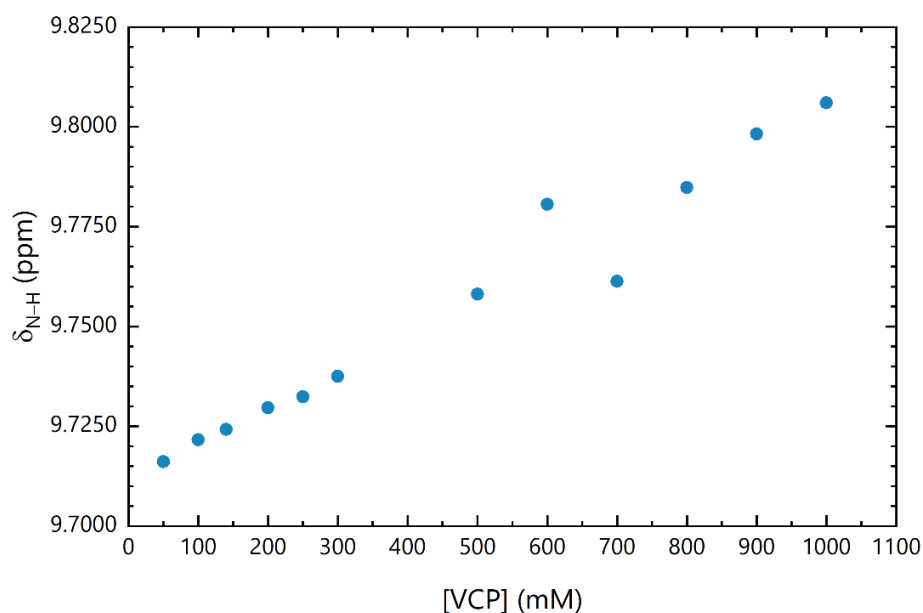

**Figure S20.** Measured amide proton shifts for racemic VCP from 50 mM to 1000 mM.

The observed changes in the chemical shift of the amide N–H proton (ca. 0.1 ppm over 20000-fold concentration change) suggest that the VCP dimerization/dissociation equilibrium does not shift measurably under the concentration regime being studied. Attempts to fit binding curves to the data were unsuccessful.<sup>16</sup>

### C. Binding Studies with (*R*)-VCP

#### Run 1: 0.05 mM to 50 mM

<sup>16</sup> Bakowski, A.; Dressel, M.; Bauer, A.; Bach, T., Enantioselective radical cyclisation reactions of 4-substituted quinolones mediated by a chiral template. *Organic & Biomolecular Chemistry* **2011**, 9 (9), 3516-3529.

Samples were prepared from a 50 mM stock solution of VCP in THF- $d_8$ . The data are shown in Table S12 and plotted in Figure S21.

**Table S12.** Measured amide proton shifts for (*R*)-VCP at concentrations from 0.05 mM to 50 mM.

| [VCP]<br>(mM)               | 0.05   | 0.1    | 0.25   | 0.5    | 1      | 5      | 10     | 20     | 50     |
|-----------------------------|--------|--------|--------|--------|--------|--------|--------|--------|--------|
| $\delta_{\text{N-H}}$ (ppm) | 9.7132 | 9.7149 | 9.7146 | 9.7149 | 9.7148 | 9.7152 | 9.7166 | 9.7158 | 9.7202 |

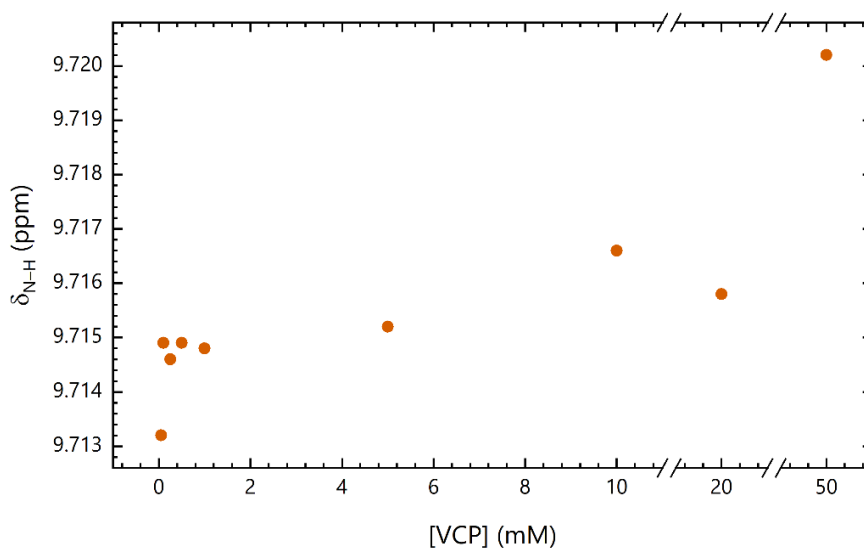

**Figure S21.** Measured amide proton shifts for (*R*)-VCP at concentrations from 0.05 mM to 50 mM.

A second run at concentrations above 50 mM was not performed as we observed similar behavior (i.e. small-magnitude shifts) between (*R*)- and racemic VCP in the lower concentration regime.

## V. Computational Methods and Results

### A. General Information

Calculations were performed on the Grace high-performance computing cluster supported by Yale University's Center for Research Computing.

Conformational searches were performed with CREST (version 2.11)<sup>17</sup> based on the xtb package (version 6.3.3).<sup>18</sup> Structures were preoptimized at the GFN2-xTB level using the analytical linearized Poisson-Boltzmann solvation model (ALPB)<sup>19</sup> for THF with the `--vtight` optimization convergence criteria. Optimized structures were then subjected to conformational searches at the i) GFN2-xTB/ALPB(THF) level (for the VCP monomers and dimers) or ii) multilevel GFN2-xTB/ALPB(THF)//GFN-FF/ALPB(THF) (for the intermediates **I<sub>R</sub>** and **I<sub>S</sub>**) with an energy window of 10 kcal/mol. Two to four distinct conformers with the lowest energies were identified and then subjected to geometry optimization, as described below.

All DFT calculations were performed with the Gaussian 16 package (Revision C.01).<sup>20</sup> Geometry optimizations were performed with the dispersion-corrected density functional B3LYP-

---

<sup>17</sup> Pracht, P.; Bohle, F.; Grimme, S., Automated exploration of the low-energy chemical space with fast quantum chemical methods. *Phys. Chem. Chem. Phys.* **2020**, *22* (14), 7169-7192.

<sup>18</sup> Bannwarth, C.; Ehlert, S.; Grimme, S., GFN2-xTB—An Accurate and Broadly Parametrized Self-Consistent Tight-Binding Quantum Chemical Method with Multipole Electrostatics and Density-Dependent Dispersion Contributions. *J. Chem. Theory Comput.* **2019**, *15* (3), 1652-1671.

<sup>19</sup> (a) Sigalov, G.; Scheffel, P.; Onufriev, A., Incorporating variable dielectric environments into the generalized Born model. *J. Chem. Phys.* **2005**, *122* (9), 094511; (b) Sigalov, G.; Fenley, A.; Onufriev, A., Analytical electrostatics for biomolecules: Beyond the generalized Born approximation. *J. Chem. Phys.* **2006**, *124* (12), 124902.

<sup>20</sup> Frisch, M. J.; Trucks, G. W.; Schlegel, H. B.; Scuseria, G. E.; Robb, M. A.; Cheeseman, J. R.; Scalmani, G.; Barone, V.; Petersson, G. A.; Nakatsuji, H.; Li, X.; Caricato, M.; Marenich, A. V.; Bloino, J.; Janesko, B. G.; Gomperts, R.; Mennucci, B.; Hratchian, H. P.; Ortiz, J. V.; Izmaylov, A. F.; Sonnenberg, J. L.; Williams, Ding, F.; Lipparini, F.; Egidi, F.; Goings, J.; Peng, B.; Petrone, A.; Henderson, T.; Ranasinghe, D.; Zakrzewski, V. G.; Gao, J.; Rega, N.; Zheng, G.; Liang, W.; Hada, M.; Ehara, M.; Toyota, K.; Fukuda, R.; Hasegawa, J.; Ishida, M.; Nakajima, T.; Honda, Y.; Kitao, O.; Nakai, H.; Vreven, T.; Throssell, K.; Montgomery Jr., J. A.; Peralta, J. E.; Ogliaro, F.; Bearpark, M. J.; Heyd, J. J.; Brothers, E. N.; Kudin, K. N.; Staroverov, V. N.; Keith, T. A.; Kobayashi, R.; Normand, J.; Raghavachari, K.; Rendell, A. P.; Burant, J. C.; Iyengar, S. S.; Tomasi, J.; Cossi, M.; Millam, J. M.; Klene, M.; Adamo, C.; Cammi, R.; Ochterski, J. W.; Martin, R. L.; Morokuma, K.; Farkas, O.; Foresman, J. B.; Fox, D. J. *Gaussian 16 Rev. C.01*, Wallingford, CT, 2016.

D3<sup>21</sup> with a Becke–Johnson (BJ) damping function<sup>22</sup> and the i) 6-31+G (d,p) (for the VCP monomers and dimers) or ii) 6-31G(d) (for the intermediates **I<sub>R</sub>** and **I<sub>S</sub>**) basis set using the polarizable continuum model of solvation (PCM) for THF.<sup>23</sup> Optimized structures were verified by frequency calculations as minima with zero imaginary frequencies. For each species, the structures with the lowest free energies are reported.

For the VCP monomers and dimers, high-level free energies including improved solvation and high-level single-point energies were further computed based on the DFT-optimized geometries. Improved solvation free energies were computed using Truhlar’s SMD solvation model<sup>24</sup> for THF at the M05-2X/6-31G(d) level of theory (*vide infra*).<sup>25</sup> High-level single-point energies were computed with the ORCA package (Version 4.2.1)<sup>26</sup> using the domain-based local pair natural orbital coupled cluster method with single, double, and perturbative triple excitations (DLPNO-CCSD(T))<sup>27</sup> with Ahlrichs’ def2/TZVPP basis set,<sup>28</sup> with Hellweg’s def2/TZVPP/C auxiliary basis set<sup>29</sup> using the TightPNO and TightSCF settings. The following equation was used to determine the final free energies:

$$G_{hl} = E_{0,CC} + \Delta G_{corr} + \Delta G_{solv,SMD}$$

<sup>21</sup> (a) Becke, A. D., Density-functional thermochemistry. III. The role of exact exchange. *J. Chem. Phys.* **1993**, *98* (7), 5648-5652; (b) Lee, C.; Yang, W.; Parr, R. G., Development of the Colle-Salvetti correlation-energy formula into a functional of the electron density. *Physical Review B* **1988**, *37* (2), 785-789; (c) Grimme, S.; Antony, J.; Ehrlich, S.; Krieg, H., A consistent and accurate ab initio parametrization of density functional dispersion correction (DFT-D) for the 94 elements H-Pu. *J. Chem. Phys.* **2010**, *132* (15), 154104; (d) Stephens, P. J.; Devlin, F. J.; Chabalowski, C. F.; Frisch, M. J., Ab Initio Calculation of Vibrational Absorption and Circular Dichroism Spectra Using Density Functional Force Fields. *J. Phys. Chem.* **1994**, *98* (45), 11623-11627; (e) Miehlich, B.; Savin, A.; Stoll, H.; Preuss, H., Results obtained with the correlation energy density functionals of Becke and Lee, Yang and Parr. *Chem. Phys. Lett.* **1989**, *157* (3), 200-206.

<sup>22</sup> Grimme, S.; Ehrlich, S.; Goerigk, L., Effect of the damping function in dispersion corrected density functional theory. *J. Comput. Chem.* **2011**, *32* (7), 1456-1465.

<sup>23</sup> Amovilli, C.; Barone, V.; Cammi, R.; Cancès, E.; Cossi, M.; Mennucci, B.; Pomelli, C. S.; Tomasi, J., Recent Advances in the Description of Solvent Effects with the Polarizable Continuum Model. In *Adv. Quantum Chem.*, Löwdin, P.-O., Ed. Academic Press: 1998; Vol. 32, pp 227-261.

<sup>24</sup> Marenich, A. V.; Cramer, C. J.; Truhlar, D. G., Universal Solvation Model Based on Solute Electron Density and on a Continuum Model of the Solvent Defined by the Bulk Dielectric Constant and Atomic Surface Tensions. *J. Phys. Chem. B* **2009**, *113* (18), 6378-6396.

<sup>25</sup> Zhao, Y.; Schultz, N. E.; Truhlar, D. G., Design of Density Functionals by Combining the Method of Constraint Satisfaction with Parametrization for Thermochemistry, Thermochemical Kinetics, and Noncovalent Interactions. *J. Chem. Theory Comput.* **2006**, *2* (2), 364-382.

<sup>26</sup> Neese, F., The ORCA program system. *WIREs Comput. Mol. Sci.* **2012**, *2* (1), 73-78.

<sup>27</sup> (a) Riplinger, C.; Neese, F., An efficient and near linear scaling pair natural orbital based local coupled cluster method. *J. Chem. Phys.* **2013**, *138* (3), 034106; (b) Lehtola, S.; Steigemann, C.; Oliveira, M. J. T.; Marques, M. A. L., Recent developments in libxc — A comprehensive library of functionals for density functional theory. *SoftwareX* **2018**, *7*, 1-5.

<sup>28</sup> Weigend, F.; Ahlrichs, R., Balanced basis sets of split valence, triple zeta valence and quadruple zeta valence quality for H to Rn: Design and assessment of accuracy. *Phys. Chem. Chem. Phys.* **2005**, *7* (18), 3297-3305.

<sup>29</sup> Hellweg, A.; Hättig, C.; Höfener, S.; Klopper, W., Optimized accurate auxiliary basis sets for RI-MP2 and RI-CC2 calculations for the atoms Rb to Rn. *Theor. Chem. Acc.* **2007**, *117* (4), 587-597.



where  $E_{0,CC}$  is the gas-phase electronic energy from DLPNO-CCSD(T);  $\Delta G_{solv,SMD}$  is the difference in electronic energies computed at the M05-2X/6-31G(d) (gas phase) and M05-2X/6-31G(d)/SMD(THF) levels of theory, then adding a correction from 1 atm to 1 mol L<sup>-1</sup> of RT ln(24.5) = +1.897 kcal/mol;<sup>30</sup>  $\Delta G_{corr}$  is the thermal correction and zero-point vibrational energy (ZPVE) evaluated from the unscaled vibrational frequencies at the initial level of optimization.

For intermediates **I<sub>R</sub>** and **I<sub>S</sub>**, high-level single-point energies were further computed. The following equation was used to determine the final free energy:

$$G_{hl} = E_{0,hl} + \Delta G_{corr},$$

where  $E_{0,hl}$  is the electronic energy at the B3LYP-D3BJ/6-311+G(d,p)/PCM(THF) level, and  $\Delta G_{corr}$  is the thermal correction and zero-point vibrational energy (ZPVE) evaluated from the unscaled vibrational frequencies at the initial level of optimization at 298.15 Kelvin.

All molecular structures were rendered in CYLView.<sup>31</sup> In all cases, the following color-coding scheme applies: H = white, C = grey, N = blue, O = red, F = lime, S = sulfur. Carbon-bound hydrogen atoms are omitted for clarity. Hydrogen bonding interactions are indicated with dotted lines.

## B. Calculated high-level VCP conformer energies

**Table S13.** Energy components for high-level conformer energies in solution for VCP.

| Species           | Energies (au)                  |                   |                  |                  |                         |              |
|-------------------|--------------------------------|-------------------|------------------|------------------|-------------------------|--------------|
|                   | $E_{0,CC}$                     | $\Delta G_{corr}$ | $E_{M05-2X,gas}$ | $E_{M05-2X,SMD}$ | $\Delta G_{solv,SMD}^a$ | $G_{hl}$     |
| <i>trans</i> -VCP | -1666.43473                    | 0.273197          | -1668.74061      | -1668.76967      | -0.0260329              | -1666.18757  |
| <i>cis</i> -VCP   | -1666.43416                    | 0.273755          | -1668.74021      | -1666.43416      | -0.0255793              | -1666.18598  |
|                   | $\Delta G$ (au)                |                   |                  |                  |                         | 0.00159      |
|                   | $\Delta G_{dim,hl}$ (kcal/mol) |                   |                  |                  |                         | <b>+1.00</b> |

<sup>a</sup> Including +1.897 kcal/mol correction

## C. Calculated high-level VCP dimerization energies

**Table S14.** Energy components for high-level dimerization energies in solution for the heterochiral VCP dimer.

| Species | Energies (au) |                   |                  |                  |                         |             |
|---------|---------------|-------------------|------------------|------------------|-------------------------|-------------|
|         | $E_{0,CC}$    | $\Delta G_{corr}$ | $E_{M05-2X,gas}$ | $E_{M05-2X,SMD}$ | $\Delta G_{solv,SMD}^a$ | $G_{hl}$    |
| monomer | -1666.43473   | 0.273197          | -1668.74061      | -1668.76967      | -0.0260329              | -1666.18757 |

<sup>30</sup> Foresman, J. B.; Frisch, A., *Exploring Chemistry with Electronic Structure Methods*. 3 ed.; Gaussian, Inc.: Wallingford, CT, 2015.

<sup>31</sup> Legault, C. Y. *CYLView*, 1.0b; Université de Sherbrook, 2009.

|                       |                                |          |             |             |            |                       |
|-----------------------|--------------------------------|----------|-------------|-------------|------------|-----------------------|
| heterochiral<br>dimer | -3332.90642                    | 0.571685 | -3337.51749 | -3337.55978 | -0.0392668 | -3332.37400           |
|                       | $\Delta G_{dim,hl}$ (au)       |          |             |             |            | 0.001139 <sup>b</sup> |
|                       | $\Delta G_{dim,hl}$ (kcal/mol) |          |             |             |            | <b>+0.715</b>         |

<sup>a</sup> Including +1.897 kcal/mol correction <sup>b</sup>  $G_{hl}(\text{dimer}) - 2 \cdot G_{hl}(\text{monomer})$

**Table S15.** Energy components for high-level dimerization energies in solution for the homochiral VCP dimer.

| Species             | Energies (au)                  |                   |                  |                  |                                    |                       |
|---------------------|--------------------------------|-------------------|------------------|------------------|------------------------------------|-----------------------|
|                     | $E_{0,CC}$                     | $\Delta G_{corr}$ | $E_{M05-2X,gas}$ | $E_{M05-2X,SMD}$ | $\Delta G_{solv,SMD}$ <sub>a</sub> | $G_{hl}$              |
| monomer             | -1666.43473                    | 0.273197          | -1668.74061      | -1668.76967      | -0.0260329                         | -1666.18757           |
| homochiral<br>dimer | -3332.90876                    | 0.576434          | -3337.51558      | -3337.55824      | -0.0396423                         | -3332.37196           |
|                     | $\Delta G_{dim,hl}$ (au)       |                   |                  |                  |                                    | 0.003172 <sup>b</sup> |
|                     | $\Delta G_{dim,hl}$ (kcal/mol) |                   |                  |                  |                                    | <b>+1.99</b>          |

<sup>a</sup> Including +1.897 kcal/mol correction <sup>b</sup>  $G_{hl}(\text{dimer}) - 2 \cdot G_{hl}(\text{monomer})$

#### D. Calculated high-level $I_R$ and $I_S$ energies

**Table S16.** Energy components for relative energies in solution for intermediates  $I_R$  and  $I_S$ .

| Species | Energies (au)              |                   |                   |
|---------|----------------------------|-------------------|-------------------|
|         | $E_{0,hl}$                 | $\Delta G_{corr}$ | $G_{hl}$          |
| $I_R$   | -3713.23944                | 1.10959           | -3712.129849      |
| $I_S$   | -3713.246291               | 1.11214           | -3712.134156      |
|         | $\Delta G_{hl}$ (kcal/mol) |                   | 2.70 <sup>a</sup> |

<sup>b</sup>  $G_{hl}(I_R) - G_{hl}(I_S)$

## E. Coordinates and energies at initial level of optimization

VCP: *trans* conformer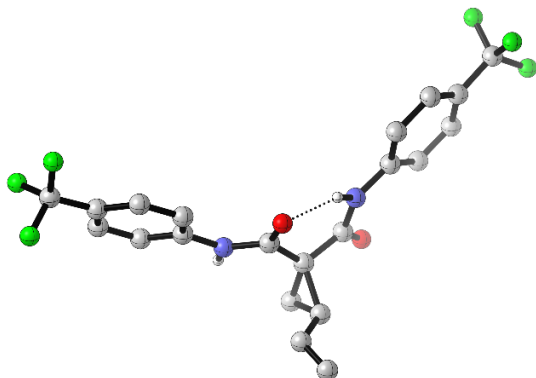

B3LYP-D3(BJ)/6-31+G(d,p)/PCM(THF)

Charge: 0

Multiplicity: 1

Electronic Energy: -1669.10419679

Imaginary Frequencies: 0

Temperature: 298.000 Kelvin

Pressure: 1.00000 Atm

Zero-point correction: 0.339660

Thermal correction to Energy: 0.367419

Thermal correction to Enthalpy: 0.368363

Thermal correction to Gibbs Free Energy: 0.273197

Sum of electronic and zero-point Energies: -1668.764537

Sum of electronic and thermal Energies: -1668.736777

Sum of electronic and thermal Enthalpies: -1668.735834

Sum of electronic and thermal Free Energies: -1668.831000

|   |              |              |              |
|---|--------------|--------------|--------------|
| C | 0.447910000  | 3.514846000  | -1.193553000 |
| C | 0.064736000  | 3.682188000  | 0.248969000  |
| C | 1.081582000  | 3.920099000  | 1.293379000  |
| C | 0.836479000  | 4.587470000  | 2.426454000  |
| H | 1.615864000  | 4.751594000  | 3.163376000  |
| H | -0.148627000 | 4.990789000  | 2.647128000  |
| H | 2.081577000  | 3.530796000  | 1.106093000  |
| H | -0.909161000 | 4.124262000  | 0.440771000  |
| C | -0.019485000 | 2.290092000  | -0.450768000 |
| C | 0.937922000  | 1.225252000  | 0.025908000  |
| O | 0.658934000  | 0.498455000  | 0.988302000  |
| N | 2.103568000  | 1.129243000  | -0.672138000 |
| C | 3.208163000  | 0.285988000  | -0.444835000 |
| C | 4.229973000  | 0.308039000  | -1.408788000 |
| C | 5.360514000  | -0.483510000 | -1.253863000 |
| C | 5.482681000  | -1.310518000 | -0.131834000 |
| C | 4.469986000  | -1.330768000 | 0.830247000  |
| C | 3.331745000  | -0.540829000 | 0.682256000  |
| H | 2.547454000  | -0.566096000 | 1.423126000  |
| H | 4.559997000  | -1.968856000 | 1.702068000  |

|   |              |              |              |
|---|--------------|--------------|--------------|
| C | 6.722864000  | -2.128296000 | 0.064277000  |
| F | 6.492487000  | -3.265043000 | 0.769984000  |
| F | 7.688017000  | -1.446308000 | 0.751449000  |
| F | 7.292553000  | -2.500844000 | -1.111171000 |
| H | 6.139574000  | -0.460142000 | -2.007084000 |
| H | 4.135842000  | 0.943943000  | -2.283766000 |
| H | 2.167100000  | 1.705118000  | -1.500089000 |
| C | -1.455707000 | 1.870143000  | -0.720233000 |
| O | -2.161437000 | 2.516758000  | -1.495783000 |
| N | -1.882117000 | 0.787298000  | -0.008987000 |
| C | -3.138121000 | 0.164900000  | -0.025744000 |
| C | -4.210971000 | 0.587699000  | -0.828153000 |
| C | -5.422012000 | -0.099536000 | -0.775814000 |
| C | -5.582948000 | -1.200683000 | 0.068958000  |
| C | -4.514277000 | -1.624222000 | 0.868293000  |
| C | -3.303848000 | -0.946368000 | 0.821252000  |
| H | -2.478388000 | -1.275126000 | 1.444856000  |
| H | -4.626535000 | -2.476960000 | 1.528243000  |
| C | -6.871135000 | -1.962781000 | 0.078481000  |
| F | -6.870493000 | -2.997180000 | -0.817253000 |
| F | -7.940384000 | -1.190090000 | -0.245025000 |
| F | -7.139344000 | -2.520460000 | 1.288945000  |
| H | -6.245793000 | 0.234236000  | -1.396733000 |
| H | -4.092571000 | 1.442821000  | -1.476114000 |
| H | -1.187849000 | 0.401740000  | 0.631192000  |
| H | 1.502251000  | 3.612481000  | -1.431781000 |
| H | -0.232691000 | 3.895986000  | -1.945249000 |

VCP: *cis* conformer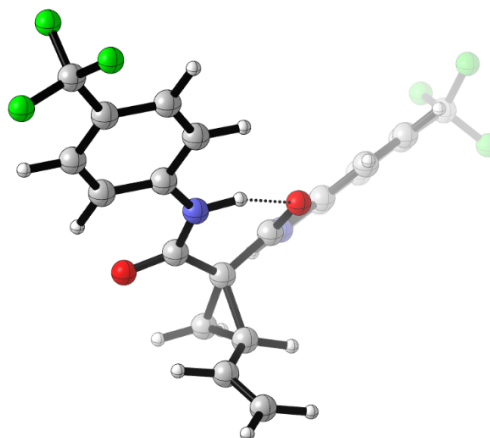

Charge: 0

Multiplicity: 1

Electronic Energy: -1669.10365420

Imaginary Frequencies: 0

Temperature: 298.000 Kelvin  
 Pressure: 1.00000 Atm  
 Zero-point correction: 0.339924  
 Thermal correction to Energy: 0.367581  
 Thermal correction to Enthalpy: 0.368525  
 Thermal correction to Gibbs Free Energy: 0.273755  
 Sum of electronic and zero-point Energies: -1668.763730  
 Sum of electronic and thermal Energies: -1668.736073  
 Sum of electronic and thermal Enthalpies: -1668.735130  
 Sum of electronic and thermal Free Energies: -1668.829899

|   |              |              |              |
|---|--------------|--------------|--------------|
| C | -0.346950000 | -3.539806000 | 1.211360000  |
| C | 0.017386000  | -3.646093000 | -0.242300000 |
| C | 1.268649000  | -4.284195000 | -0.700452000 |
| C | 1.396769000  | -4.874984000 | -1.894081000 |
| H | 2.328614000  | -5.344507000 | -2.192296000 |
| H | 0.574679000  | -4.909937000 | -2.604880000 |
| H | 2.108572000  | -4.264937000 | -0.009661000 |
| H | -0.815460000 | -3.733384000 | -0.936092000 |
| C | 0.048998000  | -2.272644000 | 0.501411000  |
| C | 1.443128000  | -1.749021000 | 0.818617000  |
| O | 2.134602000  | -2.279147000 | 1.689457000  |
| N | 1.852741000  | -0.715316000 | 0.031107000  |
| C | 3.073685000  | -0.026766000 | 0.050489000  |
| C | 4.146772000  | -0.360373000 | 0.893400000  |
| C | 5.326328000  | 0.379038000  | 0.831481000  |
| C | 5.455181000  | 1.444862000  | -0.062411000 |
| C | 4.385610000  | 1.780347000  | -0.901624000 |
| C | 3.206615000  | 1.049993000  | -0.845541000 |
| H | 2.380603000  | 1.309897000  | -1.500097000 |
| H | 4.473199000  | 2.605391000  | -1.599520000 |
| C | 6.707393000  | 2.264466000  | -0.087062000 |
| F | 7.798549000  | 1.568794000  | 0.324907000  |
| F | 6.629001000  | 3.359658000  | 0.729335000  |
| F | 6.991563000  | 2.746077000  | -1.326573000 |
| H | 6.150931000  | 0.113721000  | 1.483441000  |
| H | 4.052689000  | -1.187256000 | 1.580749000  |
| H | 1.151012000  | -0.393318000 | -0.637160000 |
| C | -0.966491000 | -1.273409000 | 0.003642000  |
| O | -0.694931000 | -0.485658000 | -0.912960000 |
| N | -2.182107000 | -1.315853000 | 0.616875000  |
| C | -3.346686000 | -0.576470000 | 0.334229000  |
| C | -4.445533000 | -0.779329000 | 1.186506000  |
| C | -5.635499000 | -0.096021000 | 0.975640000  |
| C | -5.742648000 | 0.802747000  | -0.091980000 |
| C | -4.653667000 | 1.002937000  | -0.943057000 |
| C | -3.454541000 | 0.322850000  | -0.737391000 |
| H | -2.612130000 | 0.488310000  | -1.391199000 |
| H | -4.730662000 | 1.698130000  | -1.771196000 |
| C | -7.042593000 | 1.502447000  | -0.347959000 |
| F | -6.884864000 | 2.670617000  | -1.020255000 |
| F | -7.711117000 | 1.793033000  | 0.799141000  |
| F | -7.897973000 | 0.745089000  | -1.098778000 |

|   |              |              |             |
|---|--------------|--------------|-------------|
| H | -6.473892000 | -0.259482000 | 1.643126000 |
| H | -4.364694000 | -1.472854000 | 2.017920000 |
| H | -2.250175000 | -1.930678000 | 1.416047000 |
| H | 0.374865000  | -3.897850000 | 1.936606000 |
| H | -1.384144000 | -3.709741000 | 1.478930000 |

### Heterochiral VCP dimer

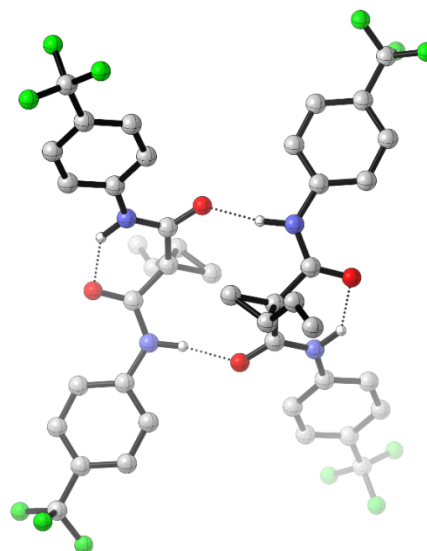

B3LYP-D3(BJ)/6-31+G(d,p)/PCM(THF)

Charge: 0

Multiplicity: 1

Electronic Energy: -3338.23871750

Imaginary Frequencies: 0

Temperature: 298.000 Kelvin

Pressure: 1.00000 Atm

Zero-point correction: 0.681812

Thermal correction to Energy: 0.738839

Thermal correction to Enthalpy: 0.739782

Thermal correction to Gibbs Free Energy: 0.571685

Sum of electronic and zero-point Energies: -3337.556905

Sum of electronic and thermal Energies: -3337.499879

Sum of electronic and thermal Enthalpies: -3337.498935

Sum of electronic and thermal Free Energies: -3337.667033

|   |              |              |              |
|---|--------------|--------------|--------------|
| C | 1.404575000  | -0.966752000 | -3.230794000 |
| C | 1.184441000  | -1.480226000 | -1.847143000 |
| C | 0.327864000  | -2.654826000 | -1.580529000 |
| C | 0.538994000  | -3.499862000 | -0.566593000 |
| H | -0.100185000 | -4.362455000 | -0.413481000 |
| H | 1.355225000  | -3.357739000 | 0.136947000  |
| H | -0.495944000 | -2.831574000 | -2.269155000 |
| H | 2.007128000  | -1.343299000 | -1.156146000 |
| C | 0.544705000  | -0.133895000 | -2.295685000 |
| C | -0.948864000 | -0.181240000 | -2.551300000 |

Supporting Information

|   |              |              |              |   |              |              |              |
|---|--------------|--------------|--------------|---|--------------|--------------|--------------|
| O | -1.415014000 | -0.623017000 | -3.600658000 | F | 7.717460000  | -5.030814000 | -0.357167000 |
| N | -1.715206000 | 0.270773000  | -1.512240000 | F | 8.541044000  | -3.335971000 | -1.455209000 |
| C | -3.125121000 | 0.296377000  | -1.446334000 | H | 6.071827000  | -4.234283000 | 1.209033000  |
| C | -3.937263000 | -0.607592000 | -2.141296000 | H | 4.317654000  | -2.742559000 | 2.106400000  |
| C | -5.319488000 | -0.572610000 | -1.960943000 | H | 3.168664000  | 0.249875000  | 0.199773000  |
| C | -5.895274000 | 0.358517000  | -1.094867000 | C | 0.057233000  | 0.096976000  | 1.688406000  |
| C | -5.084275000 | 1.270662000  | -0.407278000 | O | -0.688733000 | 0.886784000  | 1.089971000  |
| C | -3.707831000 | 1.242341000  | -0.586918000 | N | -0.324905000 | -1.128493000 | 2.129223000  |
| H | -3.073687000 | 1.940627000  | -0.051380000 | C | -1.564215000 | -1.766609000 | 1.932491000  |
| H | -5.524944000 | 1.999521000  | 0.264413000  | C | -2.743114000 | -1.061182000 | 1.661237000  |
| C | -7.375560000 | 0.389559000  | -0.863331000 | C | -3.928210000 | -1.755168000 | 1.433981000  |
| F | -7.699399000 | 0.062316000  | 0.421988000  | C | -3.953236000 | -3.149300000 | 1.501740000  |
| F | -8.055641000 | -0.465361000 | -1.663188000 | C | -2.784561000 | -3.854524000 | 1.814664000  |
| F | -7.903935000 | 1.628839000  | -1.072374000 | C | -1.597005000 | -3.166521000 | 2.029616000  |
| H | -5.943428000 | -1.284004000 | -2.488598000 | H | -0.687993000 | -3.712941000 | 2.257289000  |
| H | -3.492068000 | -1.335326000 | -2.803846000 | H | -2.797697000 | -4.936577000 | 1.880902000  |
| H | -1.247504000 | 0.522712000  | -0.636926000 | C | -5.211966000 | -3.895477000 | 1.181422000  |
| C | 1.220133000  | 1.101388000  | -1.763705000 | F | -6.328735000 | -3.153908000 | 1.388988000  |
| O | 2.399552000  | 1.067299000  | -1.386917000 | F | -5.346966000 | -5.030539000 | 1.917371000  |
| N | 0.486211000  | 2.250017000  | -1.777349000 | F | -5.256717000 | -4.290090000 | -0.127238000 |
| C | 0.851488000  | 3.516516000  | -1.280513000 | H | -4.830207000 | -1.201283000 | 1.203393000  |
| C | 2.183533000  | 3.921711000  | -1.114518000 | H | -2.730952000 | 0.015953000  | 1.618926000  |
| C | 2.456607000  | 5.190901000  | -0.609928000 | H | 0.417424000  | -1.679665000 | 2.558628000  |
| C | 1.416770000  | 6.063738000  | -0.280161000 | C | 1.651401000  | 1.442157000  | 3.191814000  |
| C | 0.087657000  | 5.664962000  | -0.460020000 | C | 2.777741000  | 1.267728000  | 4.130467000  |
| C | -0.192118000 | 4.398563000  | -0.957915000 | C | 2.676505000  | 1.432574000  | 5.453900000  |
| H | -1.223669000 | 4.087668000  | -1.090768000 | H | 3.536257000  | 1.310353000  | 6.104527000  |
| H | -0.726103000 | 6.336390000  | -0.210980000 | H | 1.732047000  | 1.696792000  | 5.923145000  |
| C | 1.716965000  | 7.405174000  | 0.316741000  | H | 3.739901000  | 1.003505000  | 3.692951000  |
| F | 1.705933000  | 7.374780000  | 1.683362000  | H | 0.711229000  | 1.741016000  | 3.648281000  |
| F | 2.939043000  | 7.875064000  | -0.039796000 | H | 2.907796000  | 2.099422000  | 1.483483000  |
| F | 0.808732000  | 8.349309000  | -0.043282000 | H | 1.140127000  | 2.539684000  | 1.319799000  |
| H | 3.487728000  | 5.499478000  | -0.481494000 |   |              |              |              |
| H | 2.988854000  | 3.249169000  | -1.367514000 |   |              |              |              |
| H | -0.485762000 | 2.164403000  | -2.044892000 |   |              |              |              |
| H | 0.866205000  | -1.440723000 | -4.043772000 |   |              |              |              |
| H | 2.382127000  | -0.562826000 | -3.467036000 |   |              |              |              |
| C | 1.883117000  | 1.898288000  | 1.775776000  |   |              |              |              |
| C | 1.488636000  | 0.467448000  | 1.997366000  |   |              |              |              |
| C | 2.475946000  | -0.669143000 | 1.858374000  |   |              |              |              |
| O | 2.412060000  | -1.660861000 | 2.595599000  |   |              |              |              |
| N | 3.366455000  | -0.517034000 | 0.842629000  |   |              |              |              |
| C | 4.353198000  | -1.419480000 | 0.404512000  |   |              |              |              |
| C | 4.766356000  | -2.534562000 | 1.146796000  |   |              |              |              |
| C | 5.754522000  | -3.373733000 | 0.632184000  |   |              |              |              |
| C | 6.330353000  | -3.112398000 | -0.611755000 |   |              |              |              |
| C | 5.917471000  | -1.996997000 | -1.352362000 |   |              |              |              |
| C | 4.936605000  | -1.155303000 | -0.848243000 |   |              |              |              |
| H | 4.605556000  | -0.296445000 | -1.422273000 |   |              |              |              |
| H | 6.358143000  | -1.787603000 | -2.321192000 |   |              |              |              |
| C | 7.386142000  | -4.009021000 | -1.182541000 |   |              |              |              |
| F | 7.000325000  | -4.571482000 | -2.364471000 |   |              |              |              |

Homochiral VCP dimer

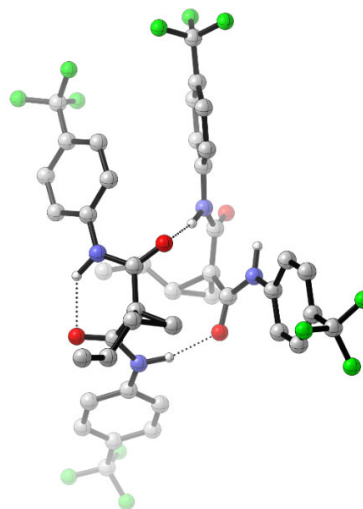

B3LYP-D3(BJ)/6-31+G(d,p)/PCM(THF)  
 Charge: 0  
 Multiplicity: 1  
 Electronic Energy: -3338.24234425  
 Imaginary Frequencies: 0  
 Temperature: 298.000 Kelvin  
 Pressure: 1.00000 Atm  
 Zero-point correction: 0.682109  
 Thermal correction to Energy: 0.738869  
 Thermal correction to Enthalpy: 0.739812  
 Thermal correction to Gibbs Free Energy: 0.576434  
 Sum of electronic and zero-point Energies: - 3337.560236  
 Sum of electronic and thermal Energies: - 3337.503476  
 Sum of electronic and thermal Enthalpies: - 3337.502532  
 Sum of electronic and thermal Free Energies: - 3337.665910

|   |              |              |              |
|---|--------------|--------------|--------------|
| C | 1.404575000  | -0.966752000 | -3.230794000 |
| C | 1.184441000  | -1.480226000 | -1.847143000 |
| C | 0.327864000  | -2.654826000 | -1.580529000 |
| C | 0.538994000  | -3.499862000 | -0.566593000 |
| H | -0.100185000 | -4.362455000 | -0.413481000 |
| H | 1.355225000  | -3.357739000 | 0.136947000  |
| H | -0.495944000 | -2.831574000 | -2.269155000 |
| H | 2.007128000  | -1.343299000 | -1.156146000 |
| C | 0.544705000  | -0.133895000 | -2.295685000 |
| C | -0.948864000 | -0.181240000 | -2.551300000 |
| O | -1.415014000 | -0.623017000 | -3.600658000 |
| N | -1.715206000 | 0.270773000  | -1.512240000 |
| C | -3.125121000 | 0.296377000  | -1.446334000 |
| C | -3.937263000 | -0.607592000 | -2.141296000 |
| C | -5.319488000 | -0.572610000 | -1.960943000 |
| C | -5.895274000 | 0.358517000  | -1.094867000 |
| C | -5.084275000 | 1.270662000  | -0.407278000 |
| C | -3.707831000 | 1.242341000  | -0.586918000 |
| H | -3.073687000 | 1.940627000  | -0.051380000 |
| H | -5.524944000 | 1.999521000  | 0.264413000  |
| C | -7.375560000 | 0.389559000  | -0.863331000 |
| F | -7.699399000 | 0.062316000  | 0.421988000  |
| F | -8.055641000 | -0.465361000 | -1.663188000 |
| F | -7.903935000 | 1.628839000  | -1.072374000 |
| H | -5.943428000 | -1.284004000 | -2.488598000 |
| H | -3.492068000 | -1.335326000 | -2.803846000 |
| H | -1.247504000 | 0.522712000  | -0.636926000 |
| C | 1.220133000  | 1.101388000  | -1.763705000 |
| O | 2.399552000  | 1.067299000  | -1.386917000 |
| N | 0.486211000  | 2.250017000  | -1.777349000 |
| C | 0.851488000  | 3.516516000  | -1.280513000 |
| C | 2.183533000  | 3.921711000  | -1.114518000 |
| C | 2.456607000  | 5.190901000  | -0.609928000 |
| C | 1.416770000  | 6.063738000  | -0.280161000 |
| C | 0.087657000  | 5.664962000  | -0.460020000 |
| C | -0.192118000 | 4.398563000  | -0.957915000 |

|   |              |              |              |
|---|--------------|--------------|--------------|
| H | -1.223669000 | 4.087668000  | -1.090768000 |
| H | -0.726103000 | 6.336390000  | -0.210980000 |
| C | 1.716965000  | 7.405174000  | 0.316741000  |
| F | 1.705933000  | 7.374780000  | 1.683362000  |
| F | 2.939043000  | 7.875064000  | -0.039796000 |
| F | 0.808732000  | 8.349309000  | -0.043282000 |
| H | 3.487728000  | 5.499478000  | -0.481494000 |
| H | 2.988854000  | 3.249169000  | -1.367514000 |
| H | -0.485762000 | 2.164403000  | -2.044892000 |
| H | 0.866205000  | -1.440723000 | -4.043772000 |
| H | 2.382127000  | -0.562826000 | -3.467036000 |
| C | 1.883117000  | 1.898288000  | 1.775776000  |
| C | 1.488636000  | 0.467448000  | 1.997366000  |
| C | 2.475946000  | -0.669143000 | 1.858374000  |
| O | 2.412060000  | -1.660861000 | 2.595599000  |
| N | 3.366455000  | -0.517034000 | 0.842629000  |
| C | 4.353198000  | -1.419480000 | 0.404512000  |
| C | 4.766356000  | -2.534562000 | 1.146796000  |
| C | 5.754522000  | -3.373733000 | 0.632184000  |
| C | 6.330353000  | -3.112398000 | -0.611755000 |
| C | 5.917471000  | -1.996997000 | -1.352362000 |
| C | 4.936605000  | -1.155303000 | -0.848243000 |
| H | 4.605556000  | -0.296445000 | -1.422273000 |
| H | 6.358143000  | -1.787603000 | -2.321192000 |
| C | 7.386142000  | -4.009021000 | -1.182541000 |
| F | 7.000325000  | -4.571482000 | -2.364471000 |
| F | 7.717460000  | -5.030814000 | -0.357167000 |
| F | 8.541044000  | -3.335971000 | -1.455209000 |
| H | 6.071827000  | -4.234283000 | 1.209033000  |
| H | 4.317654000  | -2.742559000 | 2.106400000  |
| H | 3.168664000  | 0.249875000  | 0.199773000  |
| C | 0.057233000  | 0.096976000  | 1.688406000  |
| O | -0.688733000 | 0.886784000  | 1.089971000  |
| N | -0.324905000 | -1.128493000 | 2.129223000  |
| C | -1.564215000 | -1.766609000 | 1.932491000  |
| C | -2.743114000 | -1.061182000 | 1.661237000  |
| C | -3.928210000 | -1.755168000 | 1.433981000  |
| C | -3.953236000 | -3.149300000 | 1.501740000  |
| C | -2.784561000 | -3.854524000 | 1.814664000  |
| C | -1.597005000 | -3.166521000 | 2.029616000  |
| H | -0.687993000 | -3.712941000 | 2.257289000  |
| H | -2.797697000 | -4.936577000 | 1.880902000  |
| C | -5.211966000 | -3.895477000 | 1.181422000  |
| F | -6.328735000 | -3.153908000 | 1.388988000  |
| F | -5.346966000 | -5.030539000 | 1.917371000  |
| F | -5.256717000 | -4.290090000 | -0.127238000 |
| H | -4.830207000 | -1.201283000 | 1.203393000  |
| H | -2.730952000 | 0.015953000  | 1.618926000  |
| H | 0.417424000  | -1.679665000 | 2.558628000  |
| C | 1.651401000  | 1.442157000  | 3.191814000  |
| C | 2.777741000  | 1.267728000  | 4.130467000  |
| C | 2.676505000  | 1.432574000  | 5.453900000  |

|   |             |             |             |
|---|-------------|-------------|-------------|
| H | 3.536257000 | 1.310353000 | 6.104527000 |
| H | 1.732047000 | 1.696792000 | 5.923145000 |
| H | 3.739901000 | 1.003505000 | 3.692951000 |
| H | 0.711229000 | 1.741016000 | 3.648281000 |
| H | 2.907796000 | 2.099422000 | 1.483483000 |
| H | 1.140127000 | 2.539684000 | 1.319799000 |

 $I_R$ 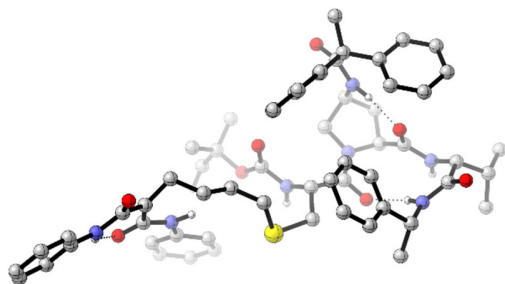

B3LYP-D3(BJ)/6-31G(d)/PCM(THF)

Charge: 0

Multiplicity: 2

Electronic Energy: -3712.31176358

Imaginary Frequencies: 0

Temperature: 298.150 Kelvin

Pressure: 1.00000 Atm

Zero-point correction: 1.225356

Thermal correction to Energy: 1.298530

Thermal correction to Enthalpy: 1.299474

Thermal correction to Gibbs Free Energy: 1.109590

Sum of electronic and zero-point Energies: -3711.086408

Sum of electronic and thermal Energies: -3711.013233

Sum of electronic and thermal Enthalpies: -3711.012289

Sum of electronic and thermal Free Energies: -3711.202174

|   |             |              |              |
|---|-------------|--------------|--------------|
| N | 2.888620000 | 2.046353000  | 0.481780000  |
| C | 2.334987000 | 1.970877000  | 1.841125000  |
| H | 1.937784000 | 2.947972000  | 2.142340000  |
| H | 1.537494000 | 1.235103000  | 1.908872000  |
| C | 3.556235000 | 1.586573000  | 2.687469000  |
| H | 3.423901000 | 1.873192000  | 3.730301000  |
| C | 4.685951000 | 2.372696000  | 1.995087000  |
| H | 4.672920000 | 3.408163000  | 2.345349000  |
| H | 5.672592000 | 1.953164000  | 2.201071000  |
| C | 4.332003000 | 2.337909000  | 0.486286000  |
| H | 4.526228000 | 3.296354000  | -0.004383000 |
| C | 5.088292000 | 1.213692000  | -0.225053000 |
| N | 5.979038000 | 1.562815000  | -1.172568000 |
| H | 6.019616000 | 2.523338000  | -1.484383000 |
| C | 6.757410000 | 0.542372000  | -1.864847000 |
| C | 7.964876000 | 1.155789000  | -2.605099000 |
| H | 8.457063000 | 0.299755000  | -3.079448000 |
| C | 5.928698000 | -0.332796000 | -2.824991000 |

|   |              |              |              |
|---|--------------|--------------|--------------|
| N | 4.704276000  | 0.124007000  | -3.161102000 |
| H | 4.308980000  | 0.916426000  | -2.662611000 |
| C | 3.801948000  | -0.603347000 | -4.042656000 |
| H | 4.437731000  | -1.247133000 | -4.658256000 |
| O | 6.432253000  | -1.365212000 | -3.273406000 |
| O | 4.913167000  | 0.032562000  | 0.090649000  |
| C | 2.260635000  | 1.821696000  | -0.691731000 |
| C | 0.775212000  | 1.403166000  | -0.649275000 |
| H | 0.704459000  | 0.502353000  | -0.032686000 |
| C | 0.300344000  | 1.080727000  | -2.074251000 |
| H | 0.908013000  | 0.271524000  | -2.479990000 |
| H | 0.441665000  | 1.950025000  | -2.721710000 |
| N | -0.026985000 | 2.405543000  | 0.021564000  |
| C | -0.781228000 | 2.115906000  | 1.121376000  |
| O | -1.514565000 | 3.180988000  | 1.474253000  |
| C | -2.208946000 | 3.228699000  | 2.781040000  |
| C | -3.260489000 | 2.123714000  | 2.882536000  |
| H | -3.940753000 | 2.166657000  | 2.028930000  |
| H | -3.849408000 | 2.277670000  | 3.792969000  |
| H | -2.798412000 | 1.137291000  | 2.927018000  |
| C | -2.875318000 | 4.602352000  | 2.748976000  |
| H | -2.126594000 | 5.390473000  | 2.620472000  |
| H | -3.403645000 | 4.775945000  | 3.691498000  |
| H | -3.592896000 | 4.664315000  | 1.926676000  |
| O | -0.749391000 | 1.030955000  | 1.697991000  |
| H | -0.162819000 | 3.307887000  | -0.414736000 |
| O | 2.863242000  | 1.930729000  | -1.769520000 |
| H | 7.126388000  | -0.151788000 | -1.104197000 |
| C | 7.547207000  | 2.134065000  | -3.711855000 |
| H | 8.427295000  | 2.463584000  | -4.273323000 |
| H | 6.847178000  | 1.673877000  | -4.416236000 |
| H | 7.071727000  | 3.037476000  | -3.307881000 |
| C | 8.948021000  | 1.798769000  | -1.620618000 |
| H | 9.841383000  | 2.150033000  | -2.147726000 |
| H | 8.502442000  | 2.661590000  | -1.111562000 |
| H | 9.263347000  | 1.083103000  | -0.853293000 |
| C | 3.083584000  | 0.414100000  | -4.942103000 |
| H | 3.815961000  | 0.977773000  | -5.528711000 |
| H | 2.395702000  | -0.082614000 | -5.631031000 |
| H | 2.510394000  | 1.116459000  | -4.328841000 |
| C | 2.816810000  | -1.491438000 | -3.282806000 |
| C | 1.895861000  | -2.265672000 | -4.003379000 |
| C | 2.796685000  | -1.557071000 | -1.885017000 |
| C | 0.972336000  | -3.078841000 | -3.346671000 |
| C | 1.862930000  | -2.360866000 | -1.225943000 |
| C | 0.951230000  | -3.127327000 | -1.951455000 |
| H | 1.904120000  | -2.241199000 | -5.089910000 |
| H | 3.511935000  | -0.987675000 | -1.304046000 |
| H | 0.271193000  | -3.673674000 | -3.925509000 |
| H | 1.840698000  | -2.380008000 | -0.142627000 |
| H | 0.231547000  | -3.750723000 | -1.430272000 |
| C | -4.890052000 | -1.255000000 | 0.812341000  |

Supporting Information

|   |               |              |              |
|---|---------------|--------------|--------------|
| C | -3.840559000  | -1.424364000 | -0.264989000 |
| C | -2.652008000  | -0.810052000 | -0.240833000 |
| C | -1.612209000  | -0.936604000 | -1.305474000 |
| H | -0.631953000  | -1.160124000 | -0.880185000 |
| H | -1.852642000  | -1.726755000 | -2.020319000 |
| H | -2.392839000  | -0.154276000 | 0.588423000  |
| H | -4.111050000  | -2.076565000 | -1.094095000 |
| C | -6.187534000  | -0.722502000 | 0.265451000  |
| C | -6.385325000  | 0.719425000  | 0.016926000  |
| O | -7.514143000  | 1.245040000  | -0.026704000 |
| N | -5.231984000  | 1.441514000  | -0.140070000 |
| C | -5.091210000  | 2.830378000  | -0.338125000 |
| C | -6.103943000  | 3.758802000  | -0.051076000 |
| C | -5.855329000  | 5.118647000  | -0.237294000 |
| C | -4.618229000  | 5.569148000  | -0.701919000 |
| C | -3.613758000  | 4.638950000  | -0.978619000 |
| C | -3.843669000  | 3.279661000  | -0.798152000 |
| H | -3.057259000  | 2.561478000  | -1.008665000 |
| H | -2.641276000  | 4.970277000  | -1.331290000 |
| H | -6.643242000  | 5.831895000  | -0.012808000 |
| H | -7.063250000  | 3.415057000  | 0.305949000  |
| H | -4.382394000  | 0.901635000  | -0.271463000 |
| C | -7.218267000  | -1.738936000 | -0.049501000 |
| O | -6.919560000  | -2.942142000 | -0.038908000 |
| N | -8.461350000  | -1.252371000 | -0.349457000 |
| C | -9.618286000  | -1.959334000 | -0.698423000 |
| C | -9.673812000  | -3.358059000 | -0.826189000 |
| C | -10.878245000 | -3.966127000 | -1.179038000 |
| C | -12.029634000 | -3.211490000 | -1.408844000 |
| C | -11.970651000 | -1.820672000 | -1.281963000 |
| C | -10.778483000 | -1.197835000 | -0.930299000 |
| H | -10.734961000 | -0.116234000 | -0.832390000 |
| H | -12.856286000 | -1.216825000 | -1.457392000 |
| H | -10.911376000 | -5.047835000 | -1.275295000 |
| H | -8.782885000  | -3.941697000 | -0.648316000 |
| H | -8.534020000  | -0.234202000 | -0.282129000 |
| H | -4.508878000  | -0.589046000 | 1.594663000  |
| H | -5.101436000  | -2.230241000 | 1.260366000  |
| S | -1.469615000  | 0.663900000  | -2.230650000 |
| N | 3.785454000   | 0.153079000  | 2.650283000  |
| H | 4.148959000   | -0.225215000 | 1.774936000  |
| C | 3.379482000   | -0.671522000 | 3.642840000  |
| O | 2.903529000   | -0.261963000 | 4.703744000  |
| C | 3.482753000   | -2.192254000 | 3.327943000  |
| C | 3.580426000   | -2.947400000 | 4.674802000  |
| H | 4.455249000   | -2.631743000 | 5.248628000  |
| H | 2.692368000   | -2.744069000 | 5.275666000  |
| C | 2.170641000   | -2.628194000 | 2.649730000  |
| C | 1.085965000   | -1.758088000 | 2.482908000  |
| C | 2.010202000   | -3.961272000 | 2.237836000  |
| C | -0.110465000  | -2.194621000 | 1.908840000  |
| C | 0.820058000   | -4.400286000 | 1.659122000  |

|   |               |              |              |
|---|---------------|--------------|--------------|
| C | -0.248630000  | -3.515997000 | 1.489262000  |
| H | 1.142862000   | -0.732261000 | 2.823798000  |
| H | 2.831929000   | -4.660683000 | 2.356589000  |
| H | -0.924727000  | -1.488573000 | 1.796809000  |
| H | 0.729914000   | -5.434688000 | 1.339899000  |
| H | -1.177548000  | -3.852321000 | 1.037352000  |
| C | 4.733884000   | -2.455547000 | 2.468496000  |
| C | 5.999863000   | -2.208420000 | 3.027153000  |
| C | 4.679367000   | -2.847758000 | 1.127037000  |
| C | 7.162449000   | -2.358831000 | 2.275871000  |
| C | 5.842106000   | -2.993035000 | 0.366633000  |
| C | 7.089183000   | -2.753758000 | 0.936628000  |
| H | 6.078860000   | -1.872818000 | 4.056888000  |
| H | 3.725210000   | -3.023145000 | 0.650670000  |
| H | 8.127112000   | -2.159212000 | 2.734574000  |
| H | 5.762296000   | -3.264469000 | -0.682124000 |
| H | 7.994302000   | -2.862989000 | 0.345812000  |
| H | 3.653512000   | -4.023176000 | 4.495893000  |
| H | -4.438267000  | 6.630666000  | -0.842094000 |
| H | -12.960473000 | -3.698273000 | -1.683564000 |
| C | -1.166763000  | 3.142358000  | 3.896091000  |
| H | -0.673641000  | 2.168290000  | 3.900263000  |
| H | -0.411248000  | 3.925686000  | 3.772830000  |
| H | -1.655578000  | 3.288198000  | 4.864693000  |

I<sub>s</sub>

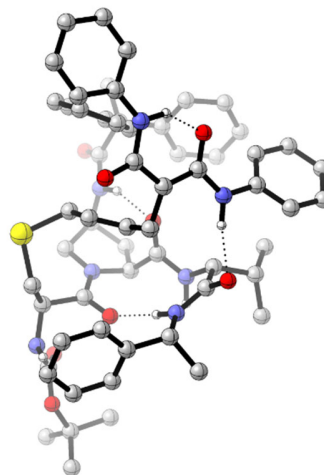

B3LYP-D3(BJ)/6-31G(d)/PCM(THF)

Charge: 0

Multiplicity: 2

Electronic Energy: -3712.32371933

Imaginary Frequencies: 0

Temperature: 298.000 Kelvin

Pressure: 1.00000 Atm

Zero-point correction: 1.225793



|                                                           |   |              |              |              |
|-----------------------------------------------------------|---|--------------|--------------|--------------|
| Thermal correction to Energy: 1.298795                    | O | -3.245265000 | 0.013836000  | -0.117610000 |
| Thermal correction to Enthalpy: 1.299739                  | H | 0.353202000  | -1.558648000 | 2.068627000  |
| Thermal correction to Gibbs Free Energy: 1.112135         | C | -2.064217000 | -3.121746000 | 4.029986000  |
| Sum of electronic and zero-point Energies: -3711.097926   | H | -2.580200000 | -2.226102000 | 4.394505000  |
| Sum of electronic and thermal Energies: -3711.024925      | H | -2.687344000 | -3.583760000 | 3.253593000  |
| Sum of electronic and thermal Enthalpies: -3711.023981    | H | -2.008095000 | -3.834747000 | 4.858781000  |
| Sum of electronic and thermal Free Energies: -3711.211584 | C | 0.060110000  | -4.041340000 | 2.977994000  |
|                                                           | H | 0.115512000  | -4.814613000 | 3.751522000  |
|                                                           | H | -0.472379000 | -4.462242000 | 2.116985000  |
|                                                           | H | 1.081268000  | -3.802534000 | 2.663941000  |
|                                                           | C | -3.451961000 | 1.200138000  | 4.423926000  |
|                                                           | H | -4.322991000 | 0.599109000  | 4.145532000  |
|                                                           | H | -2.846118000 | 0.625662000  | 5.129909000  |
|                                                           | H | -3.801700000 | 2.110467000  | 4.920867000  |
|                                                           | C | -3.324389000 | 2.456579000  | 2.207972000  |
|                                                           | C | -2.664556000 | 3.578920000  | 1.693045000  |
|                                                           | C | -4.652422000 | 2.227607000  | 1.830884000  |
|                                                           | C | -3.315588000 | 4.463336000  | 0.832417000  |
|                                                           | C | -5.315025000 | 3.117910000  | 0.984209000  |
|                                                           | C | -4.648479000 | 4.239706000  | 0.482534000  |
|                                                           | H | -1.633929000 | 3.766694000  | 1.977624000  |
|                                                           | H | -5.182935000 | 1.356674000  | 2.203130000  |
|                                                           | H | -2.785405000 | 5.327950000  | 0.444433000  |
|                                                           | H | -6.346696000 | 2.926504000  | 0.706459000  |
|                                                           | H | -5.165032000 | 4.931711000  | -0.176297000 |
|                                                           | C | 0.897812000  | 2.386954000  | 1.865966000  |
|                                                           | C | 0.454277000  | 1.671411000  | 0.600183000  |
|                                                           | C | 0.407498000  | 2.259323000  | -0.601473000 |
|                                                           | C | 0.157722000  | 1.506952000  | -1.868581000 |
|                                                           | H | 1.077292000  | 1.456612000  | -2.460938000 |
|                                                           | H | -0.155527000 | 0.482555000  | -1.666253000 |
|                                                           | H | 0.625080000  | 3.321685000  | -0.694216000 |
|                                                           | H | 0.306695000  | 0.597169000  | 0.668505000  |
|                                                           | C | 2.393619000  | 2.260997000  | 1.893986000  |
|                                                           | C | 3.067075000  | 1.023988000  | 2.333006000  |
|                                                           | O | 4.255325000  | 0.762739000  | 2.045600000  |
|                                                           | N | 2.316048000  | 0.146963000  | 3.065631000  |
|                                                           | C | 2.777035000  | -1.102562000 | 3.545428000  |
|                                                           | C | 2.355279000  | -1.512427000 | 4.817611000  |
|                                                           | C | 2.740478000  | -2.755676000 | 5.314162000  |
|                                                           | C | 3.554996000  | -3.595393000 | 4.552393000  |
|                                                           | C | 3.970098000  | -3.184720000 | 3.283928000  |
|                                                           | C | 3.581847000  | -1.948642000 | 2.769907000  |
|                                                           | H | 3.896554000  | -1.641542000 | 1.781457000  |
|                                                           | H | 4.593493000  | -3.834841000 | 2.679929000  |
|                                                           | H | 2.405088000  | -3.064173000 | 6.299973000  |
|                                                           | H | 1.717309000  | -0.857262000 | 5.400632000  |
|                                                           | H | 1.399694000  | 0.418347000  | 3.420807000  |
|                                                           | C | 3.104660000  | 3.369392000  | 1.197116000  |
|                                                           | O | 2.490526000  | 4.392220000  | 0.861808000  |
|                                                           | N | 4.430842000  | 3.159278000  | 0.936915000  |
|                                                           | C | 5.291265000  | 3.915320000  | 0.131416000  |
|                                                           | N | -2.320525000 | -1.050903000 | -1.875068000 |
|                                                           | C | -1.975363000 | -1.267768000 | -3.291099000 |
|                                                           | H | -2.883605000 | -1.478739000 | -3.868078000 |
|                                                           | H | -1.471923000 | -0.395996000 | -3.709655000 |
|                                                           | C | -1.062507000 | -2.502213000 | -3.247408000 |
|                                                           | H | -1.108821000 | -3.060593000 | -4.181206000 |
|                                                           | C | -1.645980000 | -3.305482000 | -2.064499000 |
|                                                           | H | -2.525387000 | -3.861216000 | -2.401469000 |
|                                                           | H | -0.933936000 | -4.015284000 | -1.642909000 |
|                                                           | C | -2.094646000 | -2.242282000 | -1.046221000 |
|                                                           | H | -3.036889000 | -2.518924000 | -0.564576000 |
|                                                           | C | -1.049145000 | -1.920750000 | 0.025552000  |
|                                                           | N | -1.473602000 | -2.052415000 | 1.297096000  |
|                                                           | H | -2.442909000 | -2.295000000 | 1.449643000  |
|                                                           | C | -0.665584000 | -1.684168000 | 2.443499000  |
|                                                           | C | -0.655689000 | -2.799241000 | 3.515950000  |
|                                                           | H | -0.071952000 | -2.395333000 | 4.346150000  |
|                                                           | C | -1.070960000 | -0.339160000 | 3.063878000  |
|                                                           | N | -2.118663000 | 0.323037000  | 2.548863000  |
|                                                           | H | -2.537882000 | 0.035197000  | 1.664530000  |
|                                                           | C | -2.604642000 | 1.556747000  | 3.194990000  |
|                                                           | H | -1.716464000 | 2.086109000  | 3.548240000  |
|                                                           | O | -0.421155000 | 0.089787000  | 4.036681000  |
|                                                           | O | 0.093861000  | -1.547243000 | -0.266932000 |
|                                                           | C | -2.985200000 | -0.015068000 | -1.329225000 |
|                                                           | C | -3.460390000 | 1.137327000  | -2.230716000 |
|                                                           | H | -3.477273000 | 0.825255000  | -3.275680000 |
|                                                           | C | -2.570239000 | 2.378779000  | -2.068835000 |
|                                                           | H | -2.346486000 | 2.557086000  | -1.013057000 |
|                                                           | H | -3.121830000 | 3.245125000  | -2.443720000 |
|                                                           | N | -4.817431000 | 1.495049000  | -1.835552000 |
|                                                           | C | -5.729833000 | 0.472707000  | -1.756672000 |
|                                                           | O | -6.793049000 | 0.860146000  | -1.026659000 |
|                                                           | C | -7.804127000 | -0.116748000 | -0.586616000 |
|                                                           | C | -8.571681000 | -0.655748000 | -1.793663000 |
|                                                           | H | -9.393346000 | -1.292859000 | -1.449524000 |
|                                                           | H | -7.918388000 | -1.240071000 | -2.442499000 |
|                                                           | H | -8.998312000 | 0.171674000  | -2.370183000 |
|                                                           | C | -8.713282000 | 0.725864000  | 0.306494000  |
|                                                           | H | -8.154563000 | 1.126359000  | 1.158711000  |
|                                                           | H | -9.534025000 | 0.110993000  | 0.688363000  |
|                                                           | H | -9.138381000 | 1.562195000  | -0.257138000 |
|                                                           | O | -5.573586000 | -0.613509000 | -2.300554000 |
|                                                           | H | -4.883164000 | 2.167271000  | -1.077468000 |

*Supporting Information*

|   |              |              |              |   |              |              |              |
|---|--------------|--------------|--------------|---|--------------|--------------|--------------|
| C | 4.944888000  | 5.146206000  | -0.452091000 | C | 3.510556000  | 1.124113000  | -3.711524000 |
| C | 5.870196000  | 5.804045000  | -1.262869000 | C | 3.683322000  | 1.583913000  | -2.403203000 |
| C | 7.135130000  | 5.265160000  | -1.501320000 | H | 2.963360000  | -1.286014000 | -0.741856000 |
| C | 7.477388000  | 4.042523000  | -0.916293000 | H | 3.073508000  | -0.548327000 | -4.975670000 |
| C | 6.566635000  | 3.371531000  | -0.108527000 | H | 3.602637000  | 1.032410000  | -0.324436000 |
| H | 6.831106000  | 2.416967000  | 0.338556000  | H | 3.636800000  | 1.802474000  | -4.550705000 |
| H | 8.456590000  | 3.606585000  | -1.091915000 | H | 3.955897000  | 2.617442000  | -2.210368000 |
| H | 5.592513000  | 6.753868000  | -1.711419000 | C | 2.947515000  | -3.509322000 | -1.972081000 |
| H | 3.966082000  | 5.562779000  | -0.267401000 | C | 4.159077000  | -3.462325000 | -1.263458000 |
| H | 4.774740000  | 2.254107000  | 1.273526000  | C | 1.988560000  | -4.441899000 | -1.564713000 |
| H | 0.418447000  | 1.961919000  | 2.749622000  | C | 4.382750000  | -4.286122000 | -0.163234000 |
| H | 0.649211000  | 3.447318000  | 1.811177000  | C | 2.204671000  | -5.266016000 | -0.457052000 |
| S | -1.012928000 | 2.335599000  | -3.021891000 | C | 3.398539000  | -5.185083000 | 0.255890000  |
| N | 0.338038000  | -2.163113000 | -3.036942000 | H | 4.929575000  | -2.760577000 | -1.565952000 |
| H | 0.569244000  | -1.780981000 | -2.119608000 | H | 1.065752000  | -4.549087000 | -2.121343000 |
| C | 1.316865000  | -2.770664000 | -3.760425000 | H | 5.329318000  | -4.223958000 | 0.366311000  |
| O | 1.086755000  | -3.429304000 | -4.774297000 | H | 1.435682000  | -5.972888000 | -0.158524000 |
| C | 2.758491000  | -2.606831000 | -3.204583000 | H | 3.566048000  | -5.819189000 | 1.121339000  |
| C | 3.742100000  | -3.112153000 | -4.287117000 | H | 3.582383000  | -4.177876000 | -4.462054000 |
| H | 3.598401000  | -2.593242000 | -5.236617000 | H | 3.860451000  | -4.562130000 | 4.941176000  |
| H | 4.771437000  | -2.957437000 | -3.953650000 | H | 7.845635000  | 5.788703000  | -2.133756000 |
| C | 3.028804000  | -1.121912000 | -2.892673000 | C | -7.125176000 | -1.223036000 | 0.223372000  |
| C | 3.136895000  | -0.630072000 | -1.585935000 | H | -6.479231000 | -1.835022000 | -0.407593000 |
| C | 3.190538000  | -0.212382000 | -3.950330000 | H | -6.522118000 | -0.784337000 | 1.025690000  |
| C | 3.481687000  | 0.700335000  | -1.345153000 | H | -7.887941000 | -1.864678000 | 0.676244000  |

## VI. Complete Raw Data for Kinetics Experiments

### Experiment 1

$[\text{VCP}]_0 = 0.05 \text{ M}$  VCP,  $[\text{TBVE}]_0 = 0.1 \text{ M}$  TBVE,  $[\mathbf{1}]_T = 2.5 \text{ mM}$

Run 1: 88.5 mg VCP, 55  $\mu\text{L}$  TBVE, 14.9 mg **1**, 4 mL THF

Product: 78:22 *trans/cis*, 75% ee *trans*, 51% ee *cis*

Run 2: 88.4 mg VCP, 55  $\mu\text{L}$  TBVE, 15.0 mg **1**, 4 mL THF

Product: 77:23 *trans/cis*, 73% ee *trans*, 49% ee *cis*

| Run 1      |            |           | Run 2      |            |           |
|------------|------------|-----------|------------|------------|-----------|
| time (min) | area (mAU) | [VCP] (M) | time (min) | area (mAU) | [VCP] (M) |
| 0.3        | 11185      | 0.00172   | 0.2        | 10969      | 0.00169   |
| 4.5        | 11056      | 0.00170   | 4.6        | 10963      | 0.00169   |
| 9.2        | 10928      | 0.00168   | 9.2        | 10713      | 0.00165   |
| 13.8       | 10671      | 0.00164   | 13.7       | 10543      | 0.00162   |
| 18.0       | 10581      | 0.00163   | 18.1       | 10262      | 0.00158   |
| 22.9       | 10281      | 0.00158   | 23.0       | 9856       | 0.00152   |
| 27.1       | 9593       | 0.00148   | 27.4       | 9302       | 0.00143   |
| 31.6       | 9258       | 0.00143   | 31.6       | 8916       | 0.00137   |
| 36.0       | 8594       | 0.00132   | 36.0       | 8372       | 0.00129   |
| 40.9       | 7934       | 0.00122   | 40.9       | 7848       | 0.00121   |
| 45.2       | 7494       | 0.00115   | 45.0       | 7316       | 0.00113   |
| 49.6       | 6821       | 0.00105   | 49.9       | 6602       | 0.00102   |
| 54.1       | 6336       | 0.00098   | 53.8       | 6164       | 0.00095   |
| 59.1       | 5697       | 0.00088   | 58.4       | 5623       | 0.00087   |
| 63.0       | 5228       | 0.00081   | 62.9       | 5030       | 0.00077   |
| 67.5       | 4738       | 0.00073   | 67.8       | 4491       | 0.00069   |
| 71.8       | 4250       | 0.00065   | 72.0       | 4080       | 0.00063   |
| 76.8       | 3838       | 0.00059   | 76.6       | 3591       | 0.00055   |
| 81.1       | 3397       | 0.00052   | 80.9       | 3216       | 0.00050   |
| 85.4       | 3069       | 0.00047   | 85.6       | 2796       | 0.00043   |
| 90.1       | 2648       | 0.00041   | 90.0       | 2346       | 0.00036   |
| 94.9       | 2268       | 0.00035   | 94.4       | 2053       | 0.00032   |
| 99.2       | 1987       | 0.00031   | 99.0       | 1797       | 0.00028   |
| 103.7      | 1705       | 0.00026   | 103.5      | 1485       | 0.00023   |
| 107.9      | 1486       | 0.00023   | 107.9      | 1242       | 0.00019   |
| 112.8      | 1185       | 0.00018   | 112.9      | 1086       | 0.00017   |
| 117.0      | 1015       | 0.00016   | 116.9      | 825        | 0.00013   |

|       |     |         |       |     |         |
|-------|-----|---------|-------|-----|---------|
| 121.6 | 843 | 0.00013 | 121.6 | 645 | 0.00010 |
| 126.1 | 694 | 0.00011 | 125.9 | 522 | 0.00008 |
| 130.7 | 532 | 0.00008 | 131.6 | 362 | 0.00006 |
| 135.1 | 453 | 0.00007 | 134.8 | 299 | 0.00005 |
| 139.5 | 343 | 0.00005 | 139.6 | 244 | 0.00004 |
| 143.7 | 273 | 0.00004 | 143.8 | 161 | 0.00002 |

**Experiment 2**

$[\text{VCP}]_0 = 0.05 \text{ M VCP}$ ,  $[\text{TBVE}]_0 = 0.2 \text{ M TBVE}$ ,  $[\mathbf{1}]_{\text{T}} = 2.5 \text{ mM}$

Run 1: 88.5 mg VCP, 110  $\mu\text{L}$  TBVE, 14.8 mg **1**, 4 mL THF

Product: 77:23 *trans/cis*, 75% ee *trans*, 50% ee *cis*

Run 2: 88.6 mg VCP, 110  $\mu\text{L}$  TBVE, 14.9 mg **1**, 4 mL THF

Product: 77:23 *trans/cis*, 74% ee *trans*, 51% ee *cis*

| Run 1      |            |           | Run 2      |            |           |
|------------|------------|-----------|------------|------------|-----------|
| time (min) | area (mAU) | [VCP] (M) | time (min) | area (mAU) | [VCP] (M) |
| 0.2        | 10910      | 0.00168   | 0.2        | 10713      | 0.00165   |
| 4.6        | 10596      | 0.00163   | 4.5        | 10591      | 0.00163   |
| 8.8        | 10341      | 0.00159   | 9.1        | 10637      | 0.00164   |
| 13.9       | 10387      | 0.00160   | 13.5       | 10329      | 0.00159   |
| 17.8       | 10292      | 0.00158   | 18.2       | 10130      | 0.00156   |
| 22.7       | 10046      | 0.00155   | 22.7       | 9866       | 0.00152   |
| 27.1       | 9664       | 0.00149   | 27.0       | 9324       | 0.00144   |
| 31.4       | 9472       | 0.00146   | 31.7       | 9177       | 0.00141   |
| 36.1       | 8821       | 0.00136   | 35.9       | 8507       | 0.00131   |
| 40.8       | 8031       | 0.00124   | 40.7       | 7935       | 0.00122   |
| 44.9       | 7617       | 0.00117   | 44.9       | 7388       | 0.00114   |
| 49.6       | 6814       | 0.00105   | 49.5       | 6619       | 0.00102   |
| 54.2       | 6092       | 0.00094   | 54.0       | 6067       | 0.00093   |
| 58.6       | 5409       | 0.00083   | 58.6       | 5359       | 0.00083   |
| 63.0       | 4865       | 0.00075   | 62.9       | 4698       | 0.00072   |
| 67.5       | 4156       | 0.00064   | 67.5       | 4128       | 0.00064   |
| 71.9       | 3555       | 0.00055   | 71.8       | 3617       | 0.00056   |
| 76.7       | 3015       | 0.00046   | 76.7       | 3056       | 0.00047   |
| 80.8       | 2543       | 0.00039   | 81.0       | 2612       | 0.00040   |

|       |      |         |       |      |         |
|-------|------|---------|-------|------|---------|
| 85.5  | 2111 | 0.00033 | 85.3  | 2230 | 0.00034 |
| 90.2  | 1729 | 0.00027 | 90.0  | 1859 | 0.00029 |
| 94.5  | 1384 | 0.00021 | 94.5  | 1514 | 0.00023 |
| 99.0  | 1148 | 0.00018 | 98.9  | 1243 | 0.00019 |
| 103.5 | 885  | 0.00014 | 103.4 | 972  | 0.00015 |
| 107.8 | 720  | 0.00011 | 108.1 | 781  | 0.00012 |
| 112.5 | 563  | 0.00009 | 112.5 | 640  | 0.00010 |
| 117.2 | 424  | 0.00007 | 116.7 | 480  | 0.00007 |
| 122.1 | 315  | 0.00005 | 121.5 | 374  | 0.00006 |
| 126.2 | 253  | 0.00004 | 126.0 | 283  | 0.00004 |
| 130.4 | 195  | 0.00003 | 130.6 | 207  | 0.00003 |
|       |      |         | 134.9 | 154  | 0.00002 |

**Experiment 3**

[VCP]<sub>0</sub> = 0.075 M, [TBVE]<sub>0</sub> = 0.1 M, [1]<sub>T</sub> = 2.5 mM

Run 1: 132.8 mg VCP, 55  $\mu$ L TBVE, 14.8 mg **1**, 4 mL THF

Product: 78:22 *trans/cis*, 75% ee *trans*, 51% ee *cis*

Run 2: 132.7 mg VCP, 55  $\mu$ L TBVE, 14.9 mg **1**, 4 mL THF

Product: 78:22 *trans/cis*, 74% ee *trans*, 50% ee *cis*

| Run 1      |            |             | Run 2      |            |           |
|------------|------------|-------------|------------|------------|-----------|
| time (min) | area (mAU) | [VCP] (M)   | time (min) | area (mAU) | [VCP] (M) |
| 0.2        | 16493.8    | 0.002539993 | 0.2        | 16103      | 0.00248   |
| 3.5        | 16164.2    | 0.002489236 | 4.9        | 15940      | 0.00245   |
| 6.8        | 16053.1    | 0.002472127 | 10.0       | 15508      | 0.00239   |
| 10.5       | 15478.5    | 0.00238364  | 15.1       | 15239      | 0.00235   |
| 13.9       | 15604.2    | 0.002402997 | 19.9       | 14690      | 0.00226   |
| 17.6       | 15646.8    | 0.002409558 | 25.2       | 14297      | 0.00220   |
| 20.9       | 15018.7    | 0.002312832 | 30.1       | 13442      | 0.00207   |
| 24.5       | 14828.3    | 0.002283511 | 35.1       | 12933      | 0.00199   |
| 28.4       | 14019.7    | 0.002158989 | 40.3       | 12078      | 0.00186   |
| 31.9       | 13304.5    | 0.002048851 | 45.9       | 11159      | 0.00172   |
| 36.0       | 13352.8    | 0.002056289 | 50.3       | 10504      | 0.00162   |
| 40.0       | 12152.7    | 0.001871477 | 55.1       | 9674       | 0.00149   |

*Supporting Information*

|       |            |             |       |      |         |
|-------|------------|-------------|-------|------|---------|
| 44.3  | 12007.2    | 0.001849071 | 59.9  | 8946 | 0.00138 |
| 48.1  | 11073.8    | 0.00170533  | 65.0  | 8227 | 0.00127 |
| 52.1  | 10606      | 0.00163329  | 70.1  | 7590 | 0.00117 |
| 56.0  | 9816.76563 | 0.001511751 | 74.8  | 7011 | 0.00108 |
| 59.9  | 9096.85449 | 0.001400887 | 80.1  | 6298 | 0.00097 |
| 63.9  | 8735.18457 | 0.001345191 | 84.9  | 5802 | 0.00089 |
| 67.9  | 8058.78809 | 0.001241028 | 89.9  | 5206 | 0.00080 |
| 72.1  | 7609.93506 | 0.001171906 | 94.9  | 4783 | 0.00074 |
| 76.0  | 7011.39453 | 0.001079733 | 100.0 | 4173 | 0.00064 |
| 80.1  | 6437.13184 | 0.000991298 | 105.0 | 3770 | 0.00058 |
| 84.0  | 6094.90869 | 0.000938597 | 110.2 | 3343 | 0.00051 |
| 88.2  | 5592.66455 | 0.000861253 | 114.8 | 2953 | 0.00045 |
| 91.8  | 5069.98047 | 0.000780761 | 119.8 | 2605 | 0.00040 |
| 95.9  | 4631.78467 | 0.00071328  | 125.0 | 2238 | 0.00034 |
| 99.9  | 4273.52051 | 0.000658109 | 129.8 | 1949 | 0.00030 |
| 103.9 | 3892.38818 | 0.000599415 | 135.2 | 1666 | 0.00026 |
| 108.1 | 3475.7334  | 0.000535252 | 139.9 | 1429 | 0.00022 |
| 112.0 | 3207.16528 | 0.000493893 | 144.9 | 1188 | 0.00018 |
| 116.0 | 2904.14526 | 0.000447229 | 150.1 | 965  | 0.00015 |
| 119.9 | 2803.37646 | 0.000431711 | 154.9 | 804  | 0.00012 |
| 124.0 | 2326.36816 | 0.000358253 | 159.8 | 655  | 0.00010 |
| 127.8 | 1986.84778 | 0.000305968 | 164.7 | 525  | 0.00008 |
| 131.9 | 1778.34143 | 0.000273859 | 169.9 | 416  | 0.00006 |
| 135.9 | 1606.49841 | 0.000247396 |       |      |         |
| 139.8 | 1317.06042 | 0.000202823 |       |      |         |
| 143.8 | 1148.85522 | 0.00017692  |       |      |         |
| 147.8 | 955.83124  | 0.000147195 |       |      |         |
| 151.6 | 824.24896  | 0.000126932 |       |      |         |

**Experiment 4**[VCP]<sub>0</sub> = 0.05 M, [TBVE]<sub>0</sub> = 0.1 M, [1]<sub>T</sub> = 1.25 mMRun 1: 88.5 mg VCP, 55  $\mu$ L TBVE, 7.4 mg **1**, 4 mL THFProduct: 76:24 *trans/cis*, 73% ee *trans*, 29% ee *cis*Run 2: 88.6 mg VCP, 55  $\mu$ L TBVE, 7.5 mg **1**, 4 mL THFProduct: 77:23 *trans/cis*, 75% ee *trans*, 51% ee *cis*

| Run 1      |            |           | Run 2      |            |           |
|------------|------------|-----------|------------|------------|-----------|
| time (min) | area (mAU) | [VCP] (M) | time (min) | area (mAU) | [VCP] (M) |
| 0.2        | 11416      | 0.05264   | 0.2        | 10895      | 0.05023   |
| 5.8        | 10828      | 0.04992   | 6.0        | 10717      | 0.04941   |
| 12.0       | 10690      | 0.04929   | 11.9       | 10477      | 0.04831   |
| 17.9       | 10279      | 0.04739   | 18.1       | 10179      | 0.04693   |
| 23.8       | 9750       | 0.04495   | 24.0       | 9981       | 0.04602   |
| 29.8       | 9606       | 0.04429   | 29.9       | 9541       | 0.04399   |
| 35.7       | 8915       | 0.04110   | 35.8       | 9029       | 0.04163   |
| 42.0       | 8441       | 0.03892   | 42.0       | 8578       | 0.03955   |
| 47.6       | 7848       | 0.03619   | 47.8       | 8006       | 0.03691   |
| 53.9       | 7221       | 0.03329   | 54.0       | 7284       | 0.03359   |
| 59.7       | 6573       | 0.03031   | 59.8       | 6950       | 0.03204   |
| 65.7       | 5822       | 0.02684   | 65.9       | 6242       | 0.02878   |
| 71.7       | 5398       | 0.02489   | 71.8       | 5709       | 0.02632   |
| 77.7       | 4785       | 0.02206   | 77.8       | 5286       | 0.02437   |
| 83.9       | 4200       | 0.01937   | 83.8       | 4700       | 0.02167   |
| 89.6       | 3706       | 0.01709   | 90.0       | 4120       | 0.01899   |
| 95.9       | 3119       | 0.01438   | 95.8       | 3713       | 0.01712   |
| 102.5      | 2687       | 0.01239   | 102.0      | 3284       | 0.01514   |
| 108.4      | 2256       | 0.01040   | 108.1      | 2871       | 0.01324   |
| 113.5      | 1909       | 0.00880   | 113.9      | 2485       | 0.01146   |
| 119.6      | 1605       | 0.00740   | 120.2      | 2030       | 0.00936   |
| 126.0      | 1266       | 0.00584   | 125.8      | 1754       | 0.00809   |
| 132.4      | 993        | 0.00458   | 131.9      | 1447       | 0.00667   |
| 138.0      | 797        | 0.00368   | 138.0      | 1190       | 0.00549   |
| 143.7      | 616        | 0.00284   | 143.8      | 966        | 0.00446   |
| 150.4      | 456        | 0.00210   | 150.1      | 778        | 0.00359   |
| 155.3      | 345        | 0.00159   | 155.9      | 596        | 0.00275   |
| 161.9      | 244        | 0.00113   | 161.8      | 471        | 0.00217   |
| 167.7      | 181        | 0.00083   | 168.1      | 360        | 0.00166   |

|       |     |         |       |     |         |
|-------|-----|---------|-------|-----|---------|
| 173.6 | 127 | 0.00058 | 173.9 | 267 | 0.00123 |
|       |     |         | 179.8 | 202 | 0.00093 |

**Experiment 5**

[VCP]<sub>0</sub> = 0.05 M, [TBVE]<sub>0</sub> = 0.1 M, [1]<sub>T</sub> = 1.62 mM

Run 1: 88.5 mg VCP, 55 μL TBVE, 9.7 mg **1**, 4 mL THF

Product: 75:25 *trans/cis*, 73% ee *trans*, 48% ee *cis*

Run 2: 88.5 mg VCP, 55 μL TBVE, 9.7 mg **1**, 4 mL THF

Product: 76:24 *trans/cis*, 72% ee *trans*, 49% ee *cis*

| Run 1      |            |           | Run 2      |            |           |
|------------|------------|-----------|------------|------------|-----------|
| time (min) | area (mAU) | [VCP] (M) | time (min) | area (mAU) | [VCP] (M) |
| 0.2        | 11040      | 0.05090   | 0.2        | 10893      | 0.05023   |
| 4.8        | 11037      | 0.05089   | 5.5        | 10695      | 0.04931   |
| 10.0       | 10449      | 0.04818   | 10.9       | 10608      | 0.04891   |
| 15.0       | 10347      | 0.04771   | 16.8       | 10301      | 0.04749   |
| 19.9       | 10074      | 0.04645   | 22.1       | 9998       | 0.04610   |
| 27.0       | 9408       | 0.04338   | 27.5       | 9542       | 0.04399   |
| 29.9       | 8921       | 0.04113   | 32.7       | 8911       | 0.04109   |
| 35.2       | 8573       | 0.03953   | 38.6       | 8328       | 0.03840   |
| 40.0       | 8069       | 0.03720   | 43.9       | 7752       | 0.03522   |
| 45.1       | 7297       | 0.03364   | 49.6       | 7059       | 0.03254   |
| 50.2       | 6793       | 0.03132   | 55.4       | 6427       | 0.02963   |
| 55.0       | 6093       | 0.02809   | 60.5       | 5734       | 0.02644   |
| 60.3       | 5501       | 0.02536   | 65.9       | 5220       | 0.02407   |
| 65.3       | 5060       | 0.02333   | 71.4       | 4637       | 0.02138   |
| 70.0       | 4554       | 0.02100   | 76.9       | 4122       | 0.01901   |
| 75.0       | 4069       | 0.01876   | 82.8       | 3567       | 0.01644   |
| 80.0       | 3572       | 0.01647   | 87.7       | 3168       | 0.01461   |
| 85.0       | 3099       | 0.01429   | 93.3       | 2717       | 0.01253   |
| 90.1       | 2722       | 0.01255   | 99.8       | 2273       | 0.01048   |
| 94.6       | 2412       | 0.01112   | 104.3      | 1962       | 0.00905   |
| 99.5       | 2057       | 0.00948   | 109.8      | 1668       | 0.00769   |
| 104.9      | 1699       | 0.00783   | 115.4      | 1321       | 0.00609   |



|       |      |         |       |      |         |
|-------|------|---------|-------|------|---------|
| 109.9 | 1493 | 0.00688 | 121.0 | 1079 | 0.00497 |
| 115.8 | 1186 | 0.00547 | 126.9 | 856  | 0.00389 |
| 120.1 | 930  | 0.00429 | 131.9 | 674  | 0.00311 |
| 124.9 | 795  | 0.00367 | 137.6 | 524  | 0.00241 |
| 129.8 | 618  | 0.00285 | 143.0 | 406  | 0.00187 |
| 135.7 | 472  | 0.00217 | 148.4 | 300  | 0.00138 |
| 139.8 | 353  | 0.00163 | 153.9 | 221  | 0.00102 |
| 144.9 | 280  | 0.00129 | 159.6 | 163  | 0.00075 |
| 149.9 | 208  | 0.00096 | 165.3 | 117  | 0.00054 |
| 154.5 | 149  | 0.00069 | 139.6 | 597  | 0.00275 |
| 160.0 | 106  | 0.00049 | 144.1 | 488  | 0.00225 |
| 164.9 | 79   | 0.00036 | 148.6 | 411  | 0.00190 |

**Experiment 6**

$[\text{VCP}]_0 = 0.05 \text{ M}$ ,  $[\text{TBVE}]_0 = 0.1 \text{ M}$ ,  $[\mathbf{1}]_T = 2.0 \text{ mM}$

Run 1: 88.5 mg VCP, 55  $\mu\text{L}$  TBVE, 12.0 mg **1**, 4 mL THF

Product: 78:22 *trans/cis*, 75% ee *trans*, 51% ee *cis*

Run 2: 88.6 mg VCP, 55  $\mu\text{L}$  TBVE, 11.9 mg **1**, 4 mL THF

Product: 78:22 *trans/cis*, 75% ee *trans*, 50% ee *cis*

| Run 1      |            |           | Run 2      |            |           |
|------------|------------|-----------|------------|------------|-----------|
| time (min) | area (mAU) | [VCP] (M) | time (min) | area (mAU) | [VCP] (M) |
| 0.2        | 10844      | 0.05000   | 0.2        | 11180      | 0.05155   |
| 5.0        | 10472      | 0.04828   | 5.1        | 10967      | 0.05057   |
| 9.8        | 10684      | 0.04853   | 10.4       | 10202      | 0.05003   |
| 14.9       | 10418      | 0.04804   | 15.1       | 10697      | 0.04932   |
| 20.0       | 9924       | 0.04576   | 19.9       | 10477      | 0.04830   |
| 25.2       | 9495       | 0.04313   | 25.0       | 9933       | 0.04580   |
| 29.8       | 8926       | 0.04115   | 30.1       | 9341       | 0.04307   |
| 35.0       | 8450       | 0.03896   | 35.2       | 8803       | 0.04059   |
| 39.9       | 7730       | 0.03564   | 40.0       | 8199       | 0.03780   |
| 45.1       | 7022       | 0.03238   | 45.2       | 7446       | 0.03433   |
| 50.0       | 6769       | 0.03075   | 50.1       | 6827       | 0.03148   |
| 55.0       | 5903       | 0.02722   | 54.8       | 6143       | 0.02832   |

|       |      |         |       |      |         |
|-------|------|---------|-------|------|---------|
| 60.1  | 5282 | 0.02435 | 60.1  | 5445 | 0.02511 |
| 65.0  | 4781 | 0.02204 | 65.3  | 4912 | 0.02265 |
| 70.4  | 4189 | 0.01932 | 70.1  | 4359 | 0.02010 |
| 74.8  | 3758 | 0.01733 | 75.0  | 3882 | 0.01790 |
| 79.8  | 3243 | 0.01495 | 80.2  | 3462 | 0.01596 |
| 84.9  | 2827 | 0.01303 | 85.2  | 3027 | 0.01395 |
| 89.7  | 2364 | 0.01090 | 90.1  | 2607 | 0.01202 |
| 94.8  | 2023 | 0.00933 | 94.9  | 2265 | 0.01044 |
| 99.8  | 1720 | 0.00793 | 99.9  | 1937 | 0.00893 |
| 104.8 | 1417 | 0.00653 | 105.0 | 1603 | 0.00739 |
| 110.0 | 1153 | 0.00531 | 110.0 | 1336 | 0.00616 |
| 114.6 | 922  | 0.00419 | 114.8 | 1081 | 0.00498 |
| 120.0 | 745  | 0.00343 | 120.0 | 855  | 0.00394 |
| 125.0 | 589  | 0.00271 | 125.2 | 666  | 0.00307 |
| 130.0 | 442  | 0.00204 | 130.2 | 515  | 0.00238 |
| 134.9 | 354  | 0.00163 | 135.0 | 433  | 0.00188 |
| 140.1 | 249  | 0.00115 | 139.9 | 303  | 0.00140 |
| 145.1 | 189  | 0.00087 | 144.9 | 235  | 0.00109 |
| 150.0 | 138  | 0.00064 | 150.1 | 168  | 0.00078 |
| 154.4 | 107  | 0.00049 | 155.1 | 121  | 0.00056 |

**Experiment 7**

[VCP]<sub>0</sub> = 0.05 M, [TBVE]<sub>0</sub> = 0.1 M, [1]<sub>T</sub> = 3.0 mM

Run 1: 88.6 mg VCP, 55  $\mu$ L TBVE, 17.7 mg **1**, 4 mL THF

Product: 78:22 *trans/cis*, 75% ee *trans*, 51% ee *cis*

Run 2: 88.5 mg VCP, 55  $\mu$ L TBVE, 17.9 mg **1**, 4 mL THF

Product: 77:23 *trans/cis*, 74% ee *trans*, 50% ee *cis*

| Run 1      |            |           | Run 2      |            |           |
|------------|------------|-----------|------------|------------|-----------|
| time (min) | area (mAU) | [VCP] (M) | time (min) | area (mAU) | [VCP] (M) |
| 0.2        | 10916      | 0.05033   | 0.2        | 10967      | 0.05057   |
| 3.8        | 10790      | 0.04975   | 4.6        | 10585      | 0.04880   |
| 8.3        | 10649      | 0.04910   | 8.9        | 10567      | 0.04872   |
| 12.6       | 10620      | 0.04897   | 13.3       | 10373      | 0.04783   |
| 15.8       | 10240      | 0.04721   | 18.0       | 10009      | 0.04615   |

*Supporting Information*

|       |      |         |       |      |         |
|-------|------|---------|-------|------|---------|
| 20.1  | 9924 | 0.04576 | 22.6  | 9575 | 0.04415 |
| 24.2  | 9547 | 0.04402 | 27.1  | 9002 | 0.04150 |
| 28.2  | 9181 | 0.04233 | 31.9  | 8602 | 0.03966 |
| 32.0  | 8716 | 0.04019 | 35.9  | 7827 | 0.03609 |
| 36.2  | 8164 | 0.03764 | 40.4  | 7244 | 0.03340 |
| 39.9  | 7855 | 0.03622 | 45.0  | 6697 | 0.03088 |
| 43.9  | 7163 | 0.03303 | 49.5  | 5977 | 0.02756 |
| 47.6  | 6578 | 0.03033 | 54.0  | 5391 | 0.02486 |
| 52.1  | 6250 | 0.02882 | 58.5  | 4910 | 0.02264 |
| 55.9  | 5720 | 0.02638 | 62.9  | 4349 | 0.02005 |
| 59.9  | 5343 | 0.02464 | 67.7  | 3777 | 0.01741 |
| 64.2  | 4582 | 0.02113 | 72.0  | 3305 | 0.01524 |
| 68.0  | 4351 | 0.02006 | 76.3  | 2926 | 0.01349 |
| 71.8  | 3958 | 0.01825 | 80.8  | 2534 | 0.01168 |
| 75.8  | 3541 | 0.01633 | 85.6  | 2124 | 0.00979 |
| 79.9  | 3204 | 0.01477 | 89.8  | 1775 | 0.00818 |
| 84.5  | 2670 | 0.01231 | 94.4  | 1486 | 0.00685 |
| 88.0  | 2463 | 0.01136 | 98.7  | 1226 | 0.00565 |
| 91.9  | 2165 | 0.00998 | 103.4 | 976  | 0.00450 |
| 96.2  | 1812 | 0.00835 | 108.4 | 759  | 0.00350 |
| 100.2 | 1605 | 0.00740 | 112.4 | 604  | 0.00279 |
| 104.1 | 1353 | 0.00624 | 117.0 | 453  | 0.00209 |
| 108.3 | 1146 | 0.00528 | 121.4 | 356  | 0.00164 |
| 111.9 | 969  | 0.00447 | 125.9 | 273  | 0.00126 |
| 116.2 | 800  | 0.00369 | 130.4 | 202  | 0.00093 |
| 120.1 | 643  | 0.00297 |       |      |         |
| 124.3 | 505  | 0.00233 |       |      |         |
| 128.1 | 424  | 0.00195 |       |      |         |
| 132.1 | 308  | 0.00142 |       |      |         |
| 136.0 | 252  | 0.00116 |       |      |         |
| 139.9 | 198  | 0.00091 |       |      |         |

**Experiment 8**[VCP]<sub>0</sub> = 0.05 M, [TBVE]<sub>0</sub> = 0.1 M, [1]<sub>T</sub> = 3.5 mMRun 1: 88.5 mg VCP, 55 μL TBVE, 20.7 mg **1**, 4 mL THF

Product ee/d.r. not measured for this run

Run 2: 88.6 mg VCP, 55 μL TBVE, 20.9 mg **1**, 4 mL THFProduct: 77:23 *trans/cis*, 74% ee *trans*, 51% ee *cis*

| Run 1      |            |           | Run 2      |            |           |
|------------|------------|-----------|------------|------------|-----------|
| time (min) | area (mAU) | [VCP] (M) | time (min) | area (mAU) | [VCP] (M) |
| 0.2        | 11175      | 0.05152   | 0.3        | 10659      | 0.04914   |
| 3.9        | 10649      | 0.04910   | 4.1        | 10469      | 0.04827   |
| 7.9        | 10820      | 0.04989   | 8.3        | 10479      | 0.04831   |
| 11.9       | 10158      | 0.04684   | 12.1       | 10189      | 0.04698   |
| 15.9       | 10109      | 0.04661   | 16.2       | 10150      | 0.04680   |
| 19.9       | 9522       | 0.04390   | 19.8       | 9668       | 0.04457   |
| 24.0       | 9045       | 0.04171   | 24.4       | 9107       | 0.04199   |
| 27.9       | 8427       | 0.03885   | 28.3       | 8576       | 0.03954   |
| 32.5       | 7714       | 0.03557   | 31.9       | 7971       | 0.03675   |
| 36.2       | 7056       | 0.03253   | 36.0       | 7397       | 0.03411   |
| 40.0       | 6583       | 0.03035   | 40.1       | 6863       | 0.03164   |
| 44.1       | 5985       | 0.02760   | 44.7       | 6083       | 0.02805   |
| 48.1       | 5368       | 0.02475   | 47.9       | 5680       | 0.02619   |
| 52.2       | 4940       | 0.02278   | 52.1       | 5158       | 0.02378   |
| 55.8       | 4293       | 0.01979   | 56.0       | 4537       | 0.02092   |
| 59.8       | 3789       | 0.01747   | 60.1       | 3994       | 0.01841   |
| 64.0       | 3396       | 0.01566   | 64.0       | 3515       | 0.01621   |
| 68.3       | 2909       | 0.01341   | 68.1       | 3046       | 0.01404   |
| 72.0       | 2578       | 0.01189   | 72.3       | 2614       | 0.01205   |
| 75.6       | 2264       | 0.01044   | 76.2       | 2276       | 0.01049   |
| 80.0       | 1901       | 0.00876   | 80.3       | 1895       | 0.00874   |
| 83.9       | 1630       | 0.00751   | 83.9       | 1632       | 0.00752   |
| 87.9       | 1348       | 0.00622   | 88.4       | 1311       | 0.00605   |
| 92.3       | 1126       | 0.00519   | 92.0       | 1102       | 0.00508   |
| 95.8       | 950        | 0.00438   | 96.1       | 890        | 0.00410   |
| 100.3      | 782        | 0.00360   | 100.1      | 720        | 0.00332   |
| 104.1      | 644        | 0.00297   | 104.2      | 555        | 0.00256   |
| 108.1      | 506        | 0.00233   | 108.0      | 444        | 0.00205   |
| 111.9      | 416        | 0.00192   | 112.0      | 341        | 0.00157   |

|       |     |         |       |     |         |
|-------|-----|---------|-------|-----|---------|
| 116.1 | 316 | 0.00146 | 116.0 | 259 | 0.00119 |
| 120.0 | 255 | 0.00117 | 120.1 | 192 | 0.00088 |
| 123.8 | 199 | 0.00092 | 124.1 | 148 | 0.00068 |
| 127.8 | 149 | 0.00069 | 128.1 | 103 | 0.00048 |
|       |     |         | 132.1 | 73  | 0.00034 |
|       |     |         | 136.6 | 59  | 0.00027 |

**Experiment 9**

[VCP]<sub>0</sub> = 0.05 M, [TBVE]<sub>0</sub> = 0.1 M, [1]<sub>T</sub> = 4.19 mM

Run 1: 88.5 mg VCP, 55 μL TBVE, 24.9 mg **1**, 4 mL THF

Product: 77:23 *trans/cis*, 75% ee *trans*, 51% ee *cis*

Run 2: 88.5 mg VCP, 55 μL TBVE, 24.8 mg **1**, 4 mL THF

Product: 78:22 *trans/cis*, 74% ee *trans*, 50% ee *cis*

| Run 1      |            |           | Run 2      |            |           |
|------------|------------|-----------|------------|------------|-----------|
| time (min) | area (mAU) | [VCP] (M) | time (min) | area (mAU) | [VCP] (M) |
| 0.2        | 10902      | 0.05027   | 0.2        | 11067      | 0.05103   |
| 3.4        | 10507      | 0.04844   | 3.7        | 10772      | 0.04967   |
| 7.2        | 10814      | 0.04986   | 7.1        | 10689      | 0.04928   |
| 10.8       | 10348      | 0.04771   | 10.6       | 10383      | 0.04787   |
| 14.4       | 10085      | 0.04650   | 14.0       | 10132      | 0.04672   |
| 17.6       | 9911       | 0.04570   | 17.7       | 9695       | 0.04470   |
| 21.2       | 9182       | 0.04234   | 21.1       | 9371       | 0.04321   |
| 24.6       | 9028       | 0.04163   | 24.7       | 9193       | 0.04239   |
| 27.9       | 8481       | 0.03910   | 28.1       | 8585       | 0.03958   |
| 31.5       | 7754       | 0.03575   | 31.7       | 8086       | 0.03728   |
| 35.2       | 7380       | 0.03403   | 35.1       | 7675       | 0.03539   |
| 38.5       | 6888       | 0.03176   | 39.1       | 6825       | 0.03147   |
| 42.1       | 6504       | 0.02999   | 42.5       | 5995       | 0.02764   |
| 45.7       | 6102       | 0.02813   | 45.6       | 5957       | 0.02747   |
| 49.0       | 5500       | 0.02536   | 49.1       | 5597       | 0.02581   |
| 52.5       | 5343       | 0.02464   | 52.7       | 5141       | 0.02370   |
| 56.7       | 4784       | 0.02206   | 56.1       | 4728       | 0.02180   |
| 60.0       | 4238       | 0.01954   | 59.7       | 4101       | 0.01891   |
| 63.1       | 4139       | 0.01908   | 63.3       | 3959       | 0.01826   |

|       |      |         |       |      |         |
|-------|------|---------|-------|------|---------|
| 66.6  | 3782 | 0.01744 | 66.9  | 3623 | 0.01671 |
| 70.1  | 3336 | 0.01538 | 70.0  | 3312 | 0.01527 |
| 73.9  | 3059 | 0.01410 | 73.7  | 3027 | 0.01396 |
| 77.3  | 2755 | 0.01270 | 77.0  | 2764 | 0.01274 |
| 80.8  | 2487 | 0.01147 | 80.6  | 2462 | 0.01135 |
| 84.4  | 2227 | 0.01027 | 84.9  | 2135 | 0.00985 |
| 87.5  | 1954 | 0.00901 | 87.9  | 1915 | 0.00883 |
| 91.2  | 1731 | 0.00798 | 91.2  | 1722 | 0.00794 |
| 94.5  | 1572 | 0.00725 | 94.4  | 1520 | 0.00701 |
| 98.0  | 1329 | 0.00613 | 98.1  | 1339 | 0.00617 |
| 101.5 | 1152 | 0.00531 | 101.6 | 1172 | 0.00540 |
| 105.1 | 964  | 0.00445 | 105.1 | 1026 | 0.00473 |
| 108.3 | 844  | 0.00389 | 108.7 | 846  | 0.00390 |
| 112.3 | 689  | 0.00318 | 112.2 | 751  | 0.00346 |
| 115.5 | 548  | 0.00253 | 115.4 | 644  | 0.00297 |
| 118.9 | 470  | 0.00217 | 119.4 | 521  | 0.00240 |
| 122.3 | 372  | 0.00172 | 122.6 | 438  | 0.00202 |
|       |      |         | 126.6 | 338  | 0.00156 |
|       |      |         | 129.7 | 290  | 0.00134 |

**Experiment 10**

[VCP]<sub>0</sub> = 0.05 M, [TBVE]<sub>0</sub> = 0.1 M, [1]<sub>T</sub> = 4.85 mM

Run 1: 88.4 mg VCP, 55  $\mu$ L TBVE, 28.7 mg **1**, 4 mL THF

Product: 78:22 *trans/cis*, 73% ee *trans*, 49% ee *cis*

Run 2: 88.5 mg VCP, 55  $\mu$ L TBVE, 28.7 mg **1**, 4 mL THF

Product: 77:23 *trans/cis*, 74% ee *trans*, 50% ee *cis*

| Run 1      |            |           | Run 2      |            |           |
|------------|------------|-----------|------------|------------|-----------|
| time (min) | area (mAU) | [VCP] (M) | time (min) | area (mAU) | [VCP] (M) |
| 0.4        | 11124      | 0.05129   | 0.2        | 10586      | 0.04881   |
| 4.3        | 10765      | 0.04890   | 4.8        | 10512      | 0.04847   |
| 7.9        | 10564      | 0.04871   | 9.1        | 10464      | 0.04825   |
| 11.9       | 10524      | 0.04852   | 13.6       | 10165      | 0.04687   |
| 16.0       | 10130      | 0.04671   | 18.0       | 9823       | 0.04529   |
| 19.9       | 9993       | 0.04608   | 22.5       | 9523       | 0.04391   |

*Supporting Information*

|       |      |         |       |      |         |
|-------|------|---------|-------|------|---------|
| 23.9  | 9506 | 0.04383 | 27.0  | 8975 | 0.04138 |
| 28.0  | 9023 | 0.04160 | 31.7  | 8304 | 0.03829 |
| 32.0  | 8411 | 0.03878 | 35.9  | 7736 | 0.03567 |
| 36.1  | 7948 | 0.03665 | 40.6  | 7069 | 0.03259 |
| 40.0  | 7479 | 0.03448 | 45.1  | 6438 | 0.02968 |
| 44.2  | 6812 | 0.03094 | 49.8  | 5677 | 0.02618 |
| 47.8  | 6099 | 0.02812 | 54.2  | 5064 | 0.02335 |
| 52.0  | 5731 | 0.02642 | 58.5  | 4508 | 0.02078 |
| 56.2  | 5195 | 0.02395 | 63.1  | 3962 | 0.01827 |
| 60.1  | 4799 | 0.02213 | 67.7  | 3342 | 0.01541 |
| 63.9  | 4251 | 0.01960 | 72.0  | 2964 | 0.01367 |
| 68.2  | 3978 | 0.01807 | 76.6  | 2439 | 0.01125 |
| 72.0  | 3443 | 0.01587 | 80.8  | 2046 | 0.00944 |
| 76.3  | 3054 | 0.01408 | 85.6  | 1668 | 0.00769 |
| 80.1  | 2737 | 0.01262 | 89.8  | 1354 | 0.00624 |
| 84.0  | 2309 | 0.01065 | 94.6  | 1070 | 0.00493 |
| 88.0  | 2092 | 0.00965 | 99.1  | 861  | 0.00397 |
| 92.2  | 1820 | 0.00827 | 103.7 | 645  | 0.00297 |
| 96.0  | 1526 | 0.00703 | 108.1 | 515  | 0.00237 |
| 100.2 | 1252 | 0.00577 | 112.5 | 399  | 0.00184 |
| 104.0 | 1073 | 0.00495 | 117.3 | 290  | 0.00134 |
| 107.9 | 905  | 0.00417 | 121.6 | 217  | 0.00100 |
| 111.8 | 738  | 0.00340 | 126.4 | 161  | 0.00074 |
| 116.1 | 615  | 0.00279 | 130.6 | 117  | 0.00054 |
| 120.1 | 478  | 0.00220 | 135.2 | 82   | 0.00038 |
| 123.9 | 368  | 0.00170 | 140.2 | 59   | 0.00027 |
| 127.9 | 296  | 0.00136 | 143.8 | 0    | 0.00000 |
| 132.3 | 221  | 0.00102 |       |      |         |
| 135.9 | 169  | 0.00077 |       |      |         |
| 140.2 | 129  | 0.00059 |       |      |         |
| 145.2 | 89   | 0.00041 |       |      |         |

**Experiment 11**[VCP]<sub>0</sub> = 0.035 M, [TBVE]<sub>0</sub> = 0.085 M, [1]<sub>T</sub> = 2.5 mMRun 1: 61.9 mg VCP, 47 μL TBVE, 15.0 mg **1**, 4 mL THFProduct: 78:22 *trans/cis*, 75% ee *trans*, 50% ee *cis*Run 2: 61.8 mg VCP, 47 μL TBVE, 15.0 mg **1**, 4 mL THFProduct: 78:22 *trans/cis*, 74% ee *trans*, 50% ee *cis*

| Run 1      |            |           | Run 2      |            |           |
|------------|------------|-----------|------------|------------|-----------|
| time (min) | area (mAU) | [VCP] (M) | time (min) | area (mAU) | [VCP] (M) |
| 0.2        | 7954       | 0.00122   | 0.2        | 7648       | 0.00118   |
| 3.3        | 8008       | 0.00123   | 3.2        | 7705       | 0.00119   |
| 6.5        | 8009       | 0.00123   | 6.9        | 8209       | 0.00126   |
| 9.8        | 7476       | 0.00115   | 10.3       | 7513       | 0.00116   |
| 12.9       | 7215       | 0.00111   | 13.4       | 7614       | 0.00117   |
| 16.3       | 7166       | 0.00110   | 16.3       | 7349       | 0.00113   |
| 19.5       | 6981       | 0.00107   | 20.0       | 7094       | 0.00109   |
| 22.7       | 6585       | 0.00101   | 23.1       | 6609       | 0.00102   |
| 25.9       | 6457       | 0.00099   | 26.4       | 6558       | 0.00101   |
| 29.3       | 5915       | 0.00091   | 29.3       | 6350       | 0.00098   |
| 32.8       | 5888       | 0.00091   | 32.4       | 5928       | 0.00091   |
| 35.8       | 5429       | 0.00084   | 35.7       | 5703       | 0.00088   |
| 39.2       | 5143       | 0.00079   | 39.2       | 5505       | 0.00085   |
| 42.5       | 4917       | 0.00076   | 42.2       | 5009       | 0.00077   |
| 45.5       | 4683       | 0.00072   | 45.4       | 4842       | 0.00075   |
| 48.7       | 4336       | 0.00067   | 48.6       | 4597       | 0.00071   |
| 52.1       | 4016       | 0.00062   | 51.9       | 4151       | 0.00064   |
| 55.4       | 3777       | 0.00058   | 55.2       | 4030       | 0.00062   |
| 58.5       | 3514       | 0.00054   | 58.6       | 3675       | 0.00057   |
| 61.7       | 3239       | 0.00050   | 61.7       | 3562       | 0.00055   |
| 65.1       | 3095       | 0.00048   | 64.8       | 3323       | 0.00051   |
| 68.1       | 2665       | 0.00041   | 68.3       | 2978       | 0.00046   |
| 71.4       | 2667       | 0.00041   | 71.3       | 2880       | 0.00044   |
| 74.7       | 2427       | 0.00037   | 74.6       | 2710       | 0.00042   |
| 78.0       | 2261       | 0.00035   | 77.8       | 2406       | 0.00037   |
| 81.4       | 2085       | 0.00032   | 81.9       | 2313       | 0.00036   |
| 84.5       | 1899       | 0.00029   | 84.7       | 2084       | 0.00032   |
| 87.8       | 1743       | 0.00027   | 87.7       | 1969       | 0.00030   |
| 90.8       | 1564       | 0.00024   | 90.9       | 1799       | 0.00028   |



|       |      |         |       |      |         |
|-------|------|---------|-------|------|---------|
| 94.1  | 1458 | 0.00022 | 94.6  | 1640 | 0.00025 |
| 97.6  | 1273 | 0.00020 | 97.9  | 1454 | 0.00022 |
| 101.0 | 1163 | 0.00018 | 100.9 | 1350 | 0.00021 |
| 104.0 | 1056 | 0.00016 | 103.9 | 1244 | 0.00019 |
| 107.5 | 884  | 0.00014 | 107.6 | 987  | 0.00015 |
| 111.2 | 827  | 0.00013 | 110.9 | 936  | 0.00014 |
| 114.0 | 697  | 0.00011 | 114.2 | 817  | 0.00013 |
| 117.1 | 593  | 0.00009 | 117.3 | 680  | 0.00010 |
| 120.2 | 529  | 0.00008 | 120.3 | 611  | 0.00009 |
| 123.6 | 452  | 0.00007 | 123.3 | 525  | 0.00008 |
| 126.6 | 370  | 0.00006 | 126.4 | 430  | 0.00007 |

**Experiment 12**

[VCP]<sub>0</sub> = 0.035 M, [TBVE]<sub>0</sub> = 0.085 M, [1]<sub>T</sub> = 2.5 mM, [P]<sub>0</sub> = 0.015 M

Product additive: 74:26 *trans/cis*, 76% ee *trans*, 55% ee *cis*

Run 1: 61.9 mg VCP, 47 μL TBVE, 14.9 mg **1**, 32.7 mg P, 4 mL THF

Product: 78:22 *trans/cis*, 73% ee *trans*, 47% ee *cis*

Run 2: 62.0 mg VCP, 47 μL TBVE, 14.8 mg **1**, 32.5 mg P, 4 mL THF

Product: 77:23 *trans/cis*, 74% ee *trans*, 50% ee *cis*

| Run 1      |            |           | Run 2      |            |           |
|------------|------------|-----------|------------|------------|-----------|
| time (min) | area (mAU) | [VCP] (M) | time (min) | area (mAU) | [VCP] (M) |
| 0.2        | 7723       | 0.03561   | 0.2        | 7573       | 0.03491   |
| 4.6        | 7539       | 0.03476   | 4.4        | 7598       | 0.03503   |
| 9.6        | 7482       | 0.03450   | 9.0        | 7441       | 0.03431   |
| 13.5       | 7160       | 0.03301   | 13.4       | 7359       | 0.03393   |
| 18.1       | 7227       | 0.03332   | 18.1       | 7404       | 0.03414   |
| 22.7       | 6893       | 0.03178   | 22.6       | 7090       | 0.03269   |
| 27.2       | 6603       | 0.03044   | 26.9       | 6909       | 0.03185   |
| 31.5       | 6412       | 0.02956   | 31.6       | 6642       | 0.03062   |
| 36.1       | 6142       | 0.02832   | 36.0       | 6279       | 0.02895   |
| 40.5       | 5679       | 0.02619   | 40.3       | 6039       | 0.02785   |
| 45.3       | 5422       | 0.02500   | 45.1       | 5674       | 0.02616   |

*Supporting Information*

|       |      |         |       |      |         |
|-------|------|---------|-------|------|---------|
| 50.6  | 4767 | 0.02198 | 49.5  | 5152 | 0.02375 |
| 54.2  | 4575 | 0.02109 | 54.0  | 4878 | 0.02249 |
| 58.7  | 4206 | 0.01939 | 58.5  | 4463 | 0.02058 |
| 63.2  | 4058 | 0.01871 | 63.4  | 4152 | 0.01914 |
| 68.0  | 3581 | 0.01651 | 67.4  | 3767 | 0.01737 |
| 72.1  | 3151 | 0.01453 | 72.1  | 3585 | 0.01653 |
| 76.6  | 2944 | 0.01358 | 76.7  | 3172 | 0.01462 |
| 81.2  | 2559 | 0.01180 | 81.6  | 2884 | 0.01330 |
| 85.7  | 2347 | 0.01082 | 85.8  | 2653 | 0.01223 |
| 89.9  | 2051 | 0.00946 | 89.8  | 2357 | 0.01087 |
| 94.5  | 1823 | 0.00841 | 95.0  | 2123 | 0.00979 |
| 99.0  | 1563 | 0.00721 | 98.7  | 1920 | 0.00885 |
| 103.7 | 1369 | 0.00631 | 103.8 | 1742 | 0.00803 |
| 108.2 | 1139 | 0.00525 | 108.2 | 1561 | 0.00709 |
| 112.7 | 976  | 0.00450 | 112.6 | 1397 | 0.00644 |
| 117.3 | 790  | 0.00364 | 117.0 | 1200 | 0.00553 |
| 121.6 | 673  | 0.00310 | 121.4 | 1090 | 0.00503 |
| 126.3 | 535  | 0.00247 | 126.2 | 912  | 0.00420 |
| 130.4 | 431  | 0.00199 | 130.9 | 812  | 0.00374 |
| 135.1 | 345  | 0.00159 | 135.0 | 682  | 0.00315 |
| 139.3 | 263  | 0.00121 | 139.6 | 597  | 0.00275 |
| 144.0 | 210  | 0.00097 | 144.1 | 488  | 0.00225 |
|       |      |         | 148.6 | 411  | 0.00190 |

**Experiment 13**

[VCP]<sub>0</sub> = 0.05 M, [TBVE]<sub>0</sub> = 0.1 M, [(*n*BuS)<sub>2</sub>]<sub>T</sub> = 2.5 mM

Run 1: 66.3 mg VCP, 41 μL TBVE, 1.5 μL (*n*BuS)<sub>2</sub>, 3 mL THF

Product: 76:24 *trans/cis*, racemic

Run 2: 66.5 mg VCP, 41 μL TBVE, 1.5 mg (*n*BuS)<sub>2</sub>, 3 mL THF

Product: 76:24 *trans/cis*, racemic

| Run 1      |            |           | Run 2      |            |           |
|------------|------------|-----------|------------|------------|-----------|
| time (min) | area (mAU) | [VCP] (M) | time (min) | area (mAU) | [VCP] (M) |
| 0.2        | 10449      | 0.04818   | 0.2        | 10757      | 0.04960   |
| 3.6        | 10145      | 0.04678   | 5.0        | 10154      | 0.04682   |
| 7.0        | 9636       | 0.04443   | 8.3        | 9697       | 0.04471   |
| 10.3       | 9071       | 0.04183   | 12.2       | 8802       | 0.04058   |
| 14.0       | 8117       | 0.03742   | 15.9       | 7950       | 0.03665   |
| 17.4       | 7343       | 0.03386   | 20.0       | 6842       | 0.03154   |
| 21.0       | 6419       | 0.02960   | 24.0       | 5862       | 0.02703   |
| 24.5       | 5594       | 0.02579   | 28.2       | 5009       | 0.02309   |
| 27.9       | 4813       | 0.02219   | 32.0       | 4114       | 0.01897   |
| 31.6       | 4000       | 0.01844   | 36.1       | 3306       | 0.01524   |
| 34.8       | 3336       | 0.01538   | 39.9       | 2680       | 0.01236   |
| 38.8       | 2628       | 0.01212   | 44.3       | 1960       | 0.00904   |
| 42.1       | 2113       | 0.00974   | 48.1       | 1487       | 0.00685   |
| 45.5       | 1619       | 0.00747   | 52.2       | 1030       | 0.00475   |
| 48.9       | 1197       | 0.00552   | 56.1       | 684        | 0.00315   |
| 52.5       | 865        | 0.00399   | 59.9       | 442        | 0.00204   |
| 56.1       | 578        | 0.00266   | 63.9       | 275        | 0.00127   |
| 59.6       | 365        | 0.00168   | 67.7       | 165        | 0.00076   |
| 63.1       | 224        | 0.00103   | 72.1       | 79         | 0.00036   |
| 66.5       | 127        | 0.00059   | 75.5       | 56         | 0.00026   |

**Experiment 14**

[VCP]<sub>0</sub> = 0.05 M, [TBVE]<sub>0</sub> = 0.2 M, [(*n*BuS)<sub>2</sub>]<sub>T</sub> = 2.5 mM

Run 1: 66.4 mg VCP, 83  $\mu$ L TBVE, 1.5  $\mu$ L (*n*BuS)<sub>2</sub>, 3 mL THF

Product: 76:24 *trans/cis*, racemic

Run 2: 66.3 mg VCP, 83  $\mu$ L TBVE, 1.5  $\mu$ L (*n*BuS)<sub>2</sub>, 3 mL THF

Product: 76:24 *trans/cis*, racemic

| Run 1      |            |           | Run 2      |            |           |
|------------|------------|-----------|------------|------------|-----------|
| time (min) | area (mAU) | [VCP] (M) | time (min) | area (mAU) | [VCP] (M) |
| 0.2        | 10811      | 0.04984   | 0.4        | 10659      | 0.04914   |
| 3.2        | 10524      | 0.04852   | 3.5        | 10722      | 0.04944   |
| 7.0        | 10162      | 0.04685   | 7.0        | 10206      | 0.04706   |
| 10.4       | 9588       | 0.04421   | 10.9       | 9663       | 0.04455   |
| 14.0       | 8640       | 0.03983   | 13.9       | 9088       | 0.04190   |
| 17.5       | 7338       | 0.03383   | 17.5       | 7888       | 0.03637   |
| 21.1       | 5864       | 0.02704   | 20.9       | 6806       | 0.03138   |
| 24.5       | 4679       | 0.02157   | 24.6       | 5775       | 0.02663   |
| 28.0       | 3513       | 0.01620   | 27.9       | 4691       | 0.02163   |
| 31.6       | 2591       | 0.01194   | 31.7       | 3658       | 0.01686   |
| 34.9       | 1845       | 0.00850   | 35.1       | 2856       | 0.01317   |
| 38.5       | 1186       | 0.00547   | 38.6       | 2070       | 0.00955   |
| 42.1       | 783        | 0.00361   | 42.2       | 1526       | 0.00704   |
| 45.8       | 459        | 0.00212   | 45.4       | 1137       | 0.00524   |
| 50.3       | 242        | 0.00112   | 48.7       | 776        | 0.00358   |
| 53.6       | 156        | 0.00072   | 52.2       | 514        | 0.00237   |
| 57.7       | 90         | 0.00042   | 56.0       | 332        | 0.00153   |
| 60.5       | 53         | 0.00024   | 59.9       | 204        | 0.00094   |
| 64.4       | 0          | 0.00000   | 62.9       | 137        | 0.00063   |
|            |            |           | 65.1       | 106        | 0.00049   |

**Experiment 15**

[VCP]<sub>0</sub> = 0.05 M, [TBVE]<sub>0</sub> = 0.1 M, [(*n*BuS)<sub>2</sub>]<sub>T</sub> = 4.0 mM

Run 1: 66.4 mg VCP, 41  $\mu$ L TBVE, 2.25  $\mu$ L (*n*BuS)<sub>2</sub>, 3 mL THF

Product: 76:24 *trans/cis*, racemic

Run 2: 66.5 mg VCP, 41  $\mu$ L TBVE, 2.25  $\mu$ L (*n*BuS)<sub>2</sub>, 3 mL THF

Product: 76:24 *trans/cis*, racemic

| Run 1      |            |           | Run 2      |            |           |
|------------|------------|-----------|------------|------------|-----------|
| time (min) | area (mAU) | [VCP] (M) | time (min) | area (mAU) | [VCP] (M) |
| 0.2        | 10869      | 0.05011   | 0.2        | 10803      | 0.04981   |
| 2.6        | 10580      | 0.04878   | 3.0        | 10314      | 0.04756   |
| 5.5        | 9970       | 0.04597   | 5.8        | 9655       | 0.04452   |
| 8.3        | 9274       | 0.04276   | 9.0        | 8792       | 0.04054   |
| 10.8       | 8270       | 0.03813   | 12.2       | 7410       | 0.03416   |
| 13.4       | 7303       | 0.03367   | 15.4       | 6232       | 0.02873   |
| 16.4       | 6220       | 0.02868   | 18.0       | 5314       | 0.02450   |
| 19.4       | 5222       | 0.02408   | 21.1       | 4384       | 0.02021   |
| 22.8       | 4062       | 0.01873   | 24.0       | 3518       | 0.01622   |
| 25.5       | 3401       | 0.01568   | 27.1       | 2681       | 0.01236   |
| 28.5       | 2652       | 0.01223   | 29.8       | 2054       | 0.00947   |
| 31.3       | 1997       | 0.00921   | 33.0       | 1393       | 0.00642   |
| 33.9       | 1496       | 0.00690   | 36.0       | 955        | 0.00440   |
| 36.3       | 1127       | 0.00520   | 38.9       | 618        | 0.00285   |
| 39.5       | 724        | 0.00334   | 42.4       | 330        | 0.00152   |
| 42.1       | 491        | 0.00226   | 45.4       | 184        | 0.00085   |
| 44.5       | 309        | 0.00142   | 48.2       | 101        | 0.00047   |
| 47.3       | 188        | 0.00086   | 50.9       | 53         | 0.00024   |
| 50.1       | 101        | 0.00047   | 54.3       | 0          | 0.00000   |
| 53.0       | 56         | 0.00026   |            |            |           |

**Experiment 16**

[VCP]<sub>0</sub> = 0.035 M, [TBVE]<sub>0</sub> = 0.085 M, [(*n*BuS)<sub>2</sub>]<sub>T</sub> = 2.5 mM

Run 1: 46.4 mg VCP, 35  $\mu$ L TBVE, 1.5  $\mu$ L (*n*BuS)<sub>2</sub>, 3 mL THF

Product: 76:24 *trans/cis*, racemic

Run 2: 46.5 mg VCP, 35  $\mu$ L TBVE, 1.5  $\mu$ L (*n*BuS)<sub>2</sub>, 3 mL THF

Product: 76:24 *trans/cis*, racemic

| Run 1      |            |           | Run 2      |            |           |
|------------|------------|-----------|------------|------------|-----------|
| time (min) | area (mAU) | [VCP] (M) | time (min) | area (mAU) | [VCP] (M) |
| 0.2        | 7710       | 0.03555   | 0.2        | 7684       | 0.03543   |
| 3.3        | 7437       | 0.03429   | 3.0        | 7662       | 0.03533   |
| 5.7        | 7010       | 0.03232   | 6.0        | 7193       | 0.03316   |
| 9.0        | 6720       | 0.03098   | 9.0        | 6788       | 0.03130   |
| 12.0       | 6081       | 0.02804   | 12.0       | 6230       | 0.02872   |
| 15.1       | 5282       | 0.02435   | 14.9       | 5552       | 0.02560   |
| 18.3       | 4606       | 0.02124   | 18.1       | 4957       | 0.02285   |
| 20.9       | 4132       | 0.01905   | 21.0       | 4334       | 0.01998   |
| 24.0       | 3452       | 0.01591   | 24.1       | 3693       | 0.01703   |
| 27.3       | 2831       | 0.01305   | 27.2       | 3053       | 0.01408   |
| 30.4       | 2324       | 0.01072   | 30.0       | 2535       | 0.01169   |
| 33.6       | 1791       | 0.00826   | 34.0       | 2048       | 0.00944   |
| 36.2       | 1484       | 0.00684   | 36.1       | 1634       | 0.00753   |
| 39.2       | 1113       | 0.00513   | 39.0       | 1256       | 0.00579   |
| 42.6       | 777        | 0.00358   | 42.0       | 929        | 0.00428   |
| 45.3       | 578        | 0.00266   | 45.2       | 646        | 0.00298   |
| 48.3       | 384        | 0.00177   | 48.1       | 440        | 0.00203   |
| 51.0       | 257        | 0.00119   | 51.2       | 283        | 0.00131   |
| 54.0       | 170        | 0.00078   | 53.9       | 187        | 0.00086   |

**Experiment 17**

$[(R)\text{-VCP}]_0 = 0.05 \text{ M}$ ,  $[\text{TBVE}]_0 = 0.1 \text{ M}$ ,  $[\mathbf{1}]_T = 2.5 \text{ mM}$

Run 1: 66.5 mg VCP, 41  $\mu\text{L}$  TBVE, 11.2 mg **1**, 3 mL THF

Product: 78:22 *trans/cis*, 75% ee *trans*, 57% ee *cis*

Run 2: 66.5 mg VCP, 41  $\mu\text{L}$  TBVE, 11.0 mg **1**, 3 mL THF

Product: 78:22 *trans/cis*, 76% ee *trans*, 55% ee *cis*

| Run 1      |            |           | Run 2      |            |           |
|------------|------------|-----------|------------|------------|-----------|
| time (min) | area (mAU) | [VCP] (M) | time (min) | area (mAU) | [VCP] (M) |
| 0.2        | 10833      | 0.04995   | 0.2        | 10449      | 0.04818   |
| 5.1        | 10504      | 0.04843   | 4.1        | 10375      | 0.04783   |
| 10.1       | 10285      | 0.04742   | 8.1        | 10050      | 0.04634   |
| 14.9       | 9609       | 0.04430   | 12.1       | 9748       | 0.04494   |
| 20.1       | 8881       | 0.04095   | 15.8       | 9351       | 0.04311   |
| 25.0       | 7780       | 0.03587   | 20.0       | 8672       | 0.03998   |
| 29.9       | 6683       | 0.03081   | 24.0       | 7949       | 0.03665   |
| 35.0       | 5744       | 0.02649   | 28.1       | 7293       | 0.03363   |
| 40.0       | 4729       | 0.02180   | 31.9       | 6302       | 0.02906   |
| 44.9       | 3746       | 0.01727   | 36.1       | 5504       | 0.02538   |
| 49.8       | 2977       | 0.01372   | 40.0       | 4671       | 0.02154   |
| 55.0       | 2205       | 0.01017   | 43.8       | 4003       | 0.01846   |
| 60.1       | 1617       | 0.00746   | 47.6       | 3338       | 0.01539   |
| 65.3       | 1097       | 0.00506   | 51.8       | 2681       | 0.01236   |
| 69.9       | 757        | 0.00349   | 56.1       | 2028       | 0.00935   |
| 75.0       | 478        | 0.00221   | 60.0       | 1587       | 0.00732   |
| 79.8       | 288        | 0.00133   | 64.0       | 1131       | 0.00521   |
| 84.9       | 164        | 0.00075   | 68.1       | 804        | 0.00371   |
| 90.1       | 89         | 0.00041   | 72.1       | 553        | 0.00255   |
| 94.9       | 52         | 0.00024   | 76.1       | 363        | 0.00167   |
| 99.8       | 0          | 0.00000   | 80.1       | 227        | 0.00105   |
|            |            |           | 84.0       | 141        | 0.00065   |
|            |            |           | 88.2       | 86         | 0.00040   |
|            |            |           | 92.1       | 50         | 0.00023   |
|            |            |           | 96.1       | 0          | 0.00000   |

**Experiment 18**

$[(R)\text{-VCP}]_0 = 0.05 \text{ M}$ ,  $[\text{TBVE}]_0 = 0.2 \text{ M}$ ,  $[\mathbf{1}]_T = 2.5 \text{ mM}$

Run 1: 66.5 mg VCP, 83  $\mu\text{L}$  TBVE, 11.0 mg **1**, 3 mL THF

Product: 76:24 *trans/cis*, 75% ee *trans*, 55% ee *cis*

Run 2: 66.5 mg VCP, 83  $\mu\text{L}$  TBVE, 11.0 mg **1**, 3 mL THF

Product: 78:22 *trans/cis*, 76% ee *trans*, 56% ee *cis*

| Run 1      |            |           | Run 2      |            |           |
|------------|------------|-----------|------------|------------|-----------|
| time (min) | area (mAU) | [VCP] (M) | time (min) | area (mAU) | [VCP] (M) |
| 0.2        | 10678      | 0.04923   | 0.2        | 10834      | 0.04995   |
| 4.0        | 10565      | 0.04871   | 3.7        | 10630      | 0.04901   |
| 8.0        | 10304      | 0.04751   | 7.8        | 10471      | 0.04828   |
| 12.1       | 10175      | 0.04691   | 11.9       | 10284      | 0.04741   |
| 16.0       | 10034      | 0.04626   | 15.8       | 9977       | 0.04600   |
| 20.2       | 9426       | 0.04346   | 20.0       | 9265       | 0.04272   |
| 24.3       | 8959       | 0.04131   | 24.1       | 8706       | 0.04014   |
| 28.2       | 8513       | 0.03925   | 27.9       | 8020       | 0.03698   |
| 32.1       | 7601       | 0.03505   | 32.2       | 7126       | 0.03286   |
| 37.0       | 6656       | 0.03069   | 36.0       | 6191       | 0.02854   |
| 40.3       | 6007       | 0.02770   | 39.7       | 5421       | 0.02499   |
| 44.1       | 5003       | 0.02307   | 44.1       | 4240       | 0.01955   |
| 47.9       | 4304       | 0.01984   | 48.0       | 3466       | 0.01598   |
| 52.1       | 3467       | 0.01598   | 52.0       | 2703       | 0.01246   |
| 56.5       | 2629       | 0.01212   | 55.9       | 2029       | 0.00936   |
| 60.0       | 2111       | 0.00973   | 60.0       | 1489       | 0.00686   |
| 64.2       | 1534       | 0.00707   | 63.9       | 1075       | 0.00496   |
| 68.4       | 1094       | 0.00505   | 67.9       | 728        | 0.00336   |
| 71.7       | 799        | 0.00368   | 72.2       | 475        | 0.00219   |
| 75.8       | 551        | 0.00254   | 76.1       | 326        | 0.00150   |
| 80.1       | 342        | 0.00158   | 79.8       | 211        | 0.00097   |
| 84.2       | 228        | 0.00105   | 83.8       | 135        | 0.00062   |
| 88.2       | 143        | 0.00066   | 88.0       | 84         | 0.00039   |
| 91.9       | 92         | 0.00043   | 92.1       | 52         | 0.00024   |
| 96.5       | 53         | 0.00025   | 96.0       | 0          | 0.00000   |
| 100.2      | 0          | 0.00000   |            |            |           |



**Experiment 19**

$[(R)\text{-VCP}]_0 = 0.035 \text{ M}$ ,  $[\text{TBVE}]_0 = 0.085 \text{ M}$ ,  $[\mathbf{1}]_{\text{T}} = 2.5 \text{ mM}$

Run 1: 46.4 mg VCP, 35  $\mu\text{L}$  TBVE, 11.1 mg **1**, 3 mL THF

Product: 77:23 *trans/cis*, 75% ee *trans*, 54% ee *cis*

Run 2: 46.3 mg VCP, 35  $\mu\text{L}$  TBVE, 11.1 mg **1**, 3 mL THF

Product: 77:23 *trans/cis*, 74% ee *trans*, 55% ee *cis*

| Run 1      |            |           | Run 2      |            |           |
|------------|------------|-----------|------------|------------|-----------|
| time (min) | area (mAU) | [VCP] (M) | time (min) | area (mAU) | [VCP] (M) |
| 0.2        | 7630       | 0.03518   | 0.2        | 7699       | 0.03550   |
| 3.4        | 7475       | 0.03446   | 3.6        | 7507       | 0.03461   |
| 6.8        | 7337       | 0.03383   | 6.9        | 7277       | 0.03355   |
| 10.5       | 7072       | 0.03261   | 10.5       | 7091       | 0.03270   |
| 14.0       | 6693       | 0.03086   | 14.1       | 6688       | 0.03083   |
| 17.6       | 6285       | 0.02898   | 18.1       | 6054       | 0.02791   |
| 21.0       | 5716       | 0.02635   | 21.1       | 5713       | 0.02634   |
| 24.5       | 5273       | 0.02431   | 24.7       | 5240       | 0.02416   |
| 28.0       | 4647       | 0.02143   | 28.1       | 4670       | 0.02153   |
| 31.7       | 4133       | 0.01906   | 31.7       | 4181       | 0.01928   |
| 35.1       | 3703       | 0.01707   | 34.8       | 3758       | 0.01733   |
| 38.6       | 3097       | 0.01428   | 38.5       | 3158       | 0.01456   |
| 42.1       | 2721       | 0.01255   | 42.1       | 2826       | 0.01303   |
| 45.6       | 2284       | 0.01053   | 45.6       | 2366       | 0.01091   |
| 48.8       | 1858       | 0.00857   | 48.8       | 1965       | 0.00906   |
| 52.5       | 1491       | 0.00687   | 52.4       | 1627       | 0.00750   |
| 56.0       | 1188       | 0.00548   | 55.9       | 1313       | 0.00605   |
| 59.6       | 893        | 0.00412   | 59.4       | 1036       | 0.00478   |
| 63.0       | 694        | 0.00320   | 63.5       | 782        | 0.00360   |
| 66.4       | 518        | 0.00239   | 66.5       | 624        | 0.00288   |
| 69.9       | 370        | 0.00171   | 70.0       | 454        | 0.00209   |
| 73.4       | 253        | 0.00117   | 73.5       | 334        | 0.00154   |
| 77.0       | 174        | 0.00080   | 76.9       | 246        | 0.00113   |
| 80.4       | 116        | 0.00053   | 80.4       | 171        | 0.00079   |
| 84.1       | 74         | 0.00034   | 84.3       | 114        | 0.00053   |
| 87.5       | 56         | 0.00026   | 87.4       | 85         | 0.00039   |
| 91.0       | 0          | 0.00000   | 90.8       | 54         | 0.00025   |

**Experiment 20**

$[(S)\text{-VCP}]_0 = 0.05 \text{ M}$ ,  $[\text{TBVE}]_0 = 0.1 \text{ M}$ ,  $[\mathbf{1}]_T = 2.5 \text{ mM}$

Run 1: 66.3 mg VCP, 41  $\mu\text{L}$  TBVE, 11.1 mg **1**, 3 mL THF

Product: 77:23 *trans/cis*, 73% ee *trans*, 47% ee *cis*

Run 2: 66.4 mg VCP, 41  $\mu\text{L}$  TBVE, 11.1 mg **1**, 3 mL THF

Product: 77:23 *trans/cis*, 71% ee *trans*, 47% ee *cis*

| Run 1      |            |           | Run 2      |            |           |
|------------|------------|-----------|------------|------------|-----------|
| time (min) | area (mAU) | [VCP] (M) | time (min) | area (mAU) | [VCP] (M) |
| 0.2        | 10689      | 0.04928   | 0.3        | 10857      | 0.05006   |
| 3.9        | 10355      | 0.04774   | 3.8        | 10690      | 0.04929   |
| 8.2        | 10498      | 0.04840   | 8.2        | 10593      | 0.04884   |
| 12.3       | 10281      | 0.04740   | 12.1       | 10381      | 0.04786   |
| 16.1       | 9881       | 0.04556   | 16.1       | 10041      | 0.04629   |
| 20.1       | 9603       | 0.04428   | 19.9       | 9441       | 0.04353   |
| 24.2       | 9021       | 0.04159   | 24.0       | 8974       | 0.04138   |
| 29.1       | 8422       | 0.03883   | 28.0       | 8372       | 0.03860   |
| 34.0       | 7741       | 0.03569   | 31.7       | 7872       | 0.03630   |
| 38.9       | 6889       | 0.03176   | 36.1       | 7100       | 0.03274   |
| 43.9       | 6017       | 0.02774   | 40.0       | 6348       | 0.02927   |
| 49.0       | 5137       | 0.02369   | 44.0       | 5554       | 0.02561   |
| 54.0       | 4356       | 0.02008   | 47.9       | 4903       | 0.02260   |
| 58.9       | 3657       | 0.01686   | 51.9       | 4297       | 0.01981   |
| 64.2       | 2920       | 0.01346   | 55.9       | 3625       | 0.01672   |
| 69.1       | 2425       | 0.01118   | 60.0       | 3119       | 0.01438   |
| 74.2       | 1916       | 0.00884   | 64.1       | 2560       | 0.01180   |
| 78.8       | 1527       | 0.00704   | 67.9       | 2129       | 0.00982   |
| 84.2       | 1129       | 0.00520   | 72.0       | 1704       | 0.00786   |
| 89.0       | 879        | 0.00405   | 76.0       | 1345       | 0.00620   |
| 93.8       | 644        | 0.00297   | 80.3       | 1020       | 0.00470   |
| 99.1       | 443        | 0.00204   | 84.5       | 765        | 0.00353   |
| 103.9      | 313        | 0.00144   | 88.1       | 568        | 0.00262   |
| 109.0      | 210        | 0.00097   | 92.0       | 421        | 0.00194   |
| 113.9      | 140        | 0.00065   | 95.9       | 303        | 0.00139   |
| 119.3      | 90         | 0.00042   | 100.1      | 204        | 0.00094   |
| 124.3      | 59         | 0.00027   | 103.9      | 146        | 0.00068   |
| 128.9      | 0          | 0.00000   | 108.3      | 96         | 0.00044   |
|            |            |           | 111.9      | 66         | 0.00031   |

|       |   |         |
|-------|---|---------|
| 115.8 | 0 | 0.00000 |
|-------|---|---------|

**Experiment 21**

$[(S)\text{-VCP}]_0 = 0.05 \text{ M}$ ,  $[\text{TBVE}]_0 = 0.2 \text{ M}$ ,  $[\mathbf{1}]_{\text{T}} = 2.5 \text{ mM}$

Run 1: 66.3 mg VCP, 83  $\mu\text{L}$  TBVE, 11.1 mg **1**, 3 mL THF

Product: 77:23 *trans/cis*, 73% ee *trans*, 46% ee *cis*

Run 2: 66.4 mg VCP, 83  $\mu\text{L}$  TBVE, 11.2 mg **1**, 3 mL THF

Product: 77:23 *trans/cis*, 73% ee *trans*, 45% ee *cis*

| Run 1      |            |           | Run 2      |            |           |
|------------|------------|-----------|------------|------------|-----------|
| time (min) | area (mAU) | [VCP] (M) | time (min) | area (mAU) | [VCP] (M) |
| 0.3        | 10772      | 0.04966   | 0.3        | 10735      | 0.04949   |
| 4.0        | 10540      | 0.04860   | 4.1        | 10552      | 0.04865   |
| 8.1        | 10498      | 0.04840   | 8.1        | 10602      | 0.04888   |
| 12.1       | 10417      | 0.04803   | 12.1       | 10411      | 0.04800   |
| 15.9       | 10059      | 0.04638   | 16.2       | 10258      | 0.04730   |
| 20.0       | 9755       | 0.04498   | 20.1       | 10041      | 0.04561   |
| 24.0       | 9369       | 0.04320   | 24.3       | 9578       | 0.04416   |
| 28.1       | 9032       | 0.04164   | 27.9       | 8965       | 0.04133   |
| 32.1       | 8197       | 0.03779   | 32.1       | 8585       | 0.03958   |
| 36.4       | 7498       | 0.03457   | 36.1       | 7952       | 0.03666   |
| 39.9       | 6938       | 0.03199   | 39.8       | 7298       | 0.03365   |
| 43.9       | 6002       | 0.02767   | 44.2       | 6544       | 0.03017   |
| 48.2       | 5223       | 0.02408   | 47.9       | 6003       | 0.02768   |
| 52.9       | 4346       | 0.02004   | 52.9       | 4996       | 0.02303   |
| 56.0       | 3874       | 0.01786   | 56.8       | 4312       | 0.01988   |
| 60.2       | 3223       | 0.01486   | 59.9       | 3857       | 0.01778   |
| 64.1       | 2611       | 0.01204   | 63.6       | 3204       | 0.01477   |
| 68.1       | 2121       | 0.00978   | 67.9       | 2610       | 0.01203   |
| 72.0       | 1738       | 0.00801   | 71.6       | 2168       | 0.01000   |
| 76.0       | 1351       | 0.00623   | 76.0       | 1620       | 0.00747   |
| 80.0       | 1034       | 0.00477   | 79.9       | 1324       | 0.00610   |
| 84.0       | 774        | 0.00357   | 84.0       | 1006       | 0.00464   |
| 87.8       | 599        | 0.00276   | 87.8       | 775        | 0.00357   |

|       |     |         |       |     |         |
|-------|-----|---------|-------|-----|---------|
| 92.0  | 428 | 0.00197 | 91.7  | 584 | 0.00269 |
| 95.8  | 309 | 0.00142 | 96.1  | 411 | 0.00189 |
| 100.1 | 217 | 0.00100 | 99.8  | 314 | 0.00145 |
| 104.2 | 149 | 0.00069 | 104.2 | 216 | 0.00010 |
| 108.0 | 108 | 0.00050 | 107.9 | 152 | 0.00007 |
| 111.9 | 77  | 0.00035 | 112.2 | 108 | 0.00005 |
| 115.9 | 52  | 0.00024 | 115.8 | 74  | 0.00003 |
| 120.3 | 0   | 0.00000 | 120.3 | 51  | 0.00002 |
|       |     |         | 124.1 | 51  | 0.00023 |

**Experiment 22**

$[(S)\text{-VCP}]_0 = 0.035 \text{ M}$ ,  $[\text{TBVE}]_0 = 0.085 \text{ M}$ ,  $[\mathbf{1}]_T = 2.5 \text{ mM}$

Run 1: 46.5 mg VCP, 35  $\mu\text{L}$  TBVE, 11.0 mg **1**, 3 mL THF

Product: 77:23 *trans/cis*, 73% ee *trans*, 45% ee *cis*

Run 2: 46.5 mg VCP, 35  $\mu\text{L}$  TBVE, 11.1 mg **1**, 3 mL THF

Product: 77:23 *trans/cis*, 74% ee *trans*, 45% ee *cis*

| Run 1      |            |           | Run 2      |            |           |
|------------|------------|-----------|------------|------------|-----------|
| time (min) | area (mAU) | [VCP] (M) | time (min) | area (mAU) | [VCP] (M) |
| 0.2        | 7507       | 0.03461   | 0.2        | 7721       | 0.03560   |
| 4.1        | 7216       | 0.03327   | 4.0        | 7431       | 0.03426   |
| 8.1        | 7153       | 0.03298   | 8.1        | 7357       | 0.03392   |
| 12.3       | 6993       | 0.03224   | 12.1       | 7151       | 0.03297   |
| 16.2       | 6503       | 0.02998   | 16.2       | 6954       | 0.03206   |
| 20.1       | 6345       | 0.02925   | 20.2       | 6553       | 0.03021   |
| 24.3       | 5929       | 0.02734   | 23.7       | 6012       | 0.02772   |
| 27.9       | 5434       | 0.02505   | 28.1       | 5524       | 0.02547   |
| 32.1       | 5030       | 0.02319   | 32.0       | 5258       | 0.02424   |
| 36.0       | 4577       | 0.02110   | 36.1       | 4550       | 0.02098   |
| 39.9       | 3959       | 0.01825   | 40.0       | 4003       | 0.01846   |
| 43.9       | 3619       | 0.01669   | 43.9       | 3499       | 0.01613   |
| 47.8       | 3239       | 0.01493   | 47.9       | 3009       | 0.01387   |
| 52.0       | 2756       | 0.01271   | 52.0       | 2569       | 0.01185   |
| 56.0       | 2407       | 0.01110   | 56.2       | 2085       | 0.00961   |
| 60.1       | 2037       | 0.00939   | 60.1       | 1743       | 0.00804   |

|       |      |         |       |      |         |
|-------|------|---------|-------|------|---------|
| 63.8  | 1704 | 0.00786 | 63.7  | 1420 | 0.00655 |
| 68.3  | 1421 | 0.00655 | 67.9  | 1102 | 0.00508 |
| 72.1  | 1159 | 0.00534 | 72.2  | 853  | 0.00393 |
| 75.9  | 906  | 0.00418 | 76.0  | 656  | 0.00302 |
| 79.9  | 728  | 0.00336 | 80.0  | 486  | 0.00224 |
| 84.2  | 556  | 0.00256 | 84.5  | 337  | 0.00156 |
| 88.0  | 429  | 0.00198 | 87.8  | 264  | 0.00122 |
| 91.9  | 322  | 0.00149 | 91.7  | 184  | 0.00085 |
| 96.4  | 213  | 0.00098 | 95.6  | 135  | 0.00062 |
| 100.1 | 160  | 0.00074 | 99.8  | 96   | 0.00044 |
| 104.2 | 106  | 0.00049 | 103.7 | 63   | 0.00029 |
| 107.9 | 82   | 0.00038 | 107.8 | 0    | 0.00000 |
| 111.7 | 56   | 0.00026 |       |      |         |
| 115.8 | 0    | 0.00000 |       |      |         |

**Experiment 23**

[VCP]<sub>0</sub> = 0.05 M VCP, [TBVE]<sub>0</sub> = 0.1 M TBVE, [2]<sub>T</sub> = 2.5 mM

Run 1: 66.4 mg VCP, 41  $\mu$ L TBVE, 7.8 mg **2**, 3 mL THF

Product: 71:29 *trans/cis*, 12% ee *trans*, 1% ee *cis*

Run 2: 66.3 mg VCP, 41  $\mu$ L TBVE, 7.7 mg **2**, 4 mL THF

Product: 71:29 *trans/cis*, 13% ee *trans*, 4% ee *cis*

| Run 1      |            |           | Run 2      |            |           |
|------------|------------|-----------|------------|------------|-----------|
| time (min) | area (mAU) | [VCP] (M) | time (min) | area (mAU) | [VCP] (M) |
| 0.2        | 10894      | 0.05023   | 0.2        | 10392      | 0.04791   |
| 6.4        | 10746      | 0.04955   | 9.0        | 10096      | 0.04655   |
| 12.0       | 10663      | 0.04916   | 17.0       | 9726       | 0.04484   |
| 18.0       | 10364      | 0.04779   | 25.7       | 9168       | 0.04227   |
| 24.1       | 10126      | 0.04669   | 34.7       | 8630       | 0.03979   |
| 30.1       | 9823       | 0.04529   | 42.6       | 7936       | 0.03659   |
| 36.0       | 9345       | 0.04309   | 50.7       | 7291       | 0.03362   |
| 42.0       | 9018       | 0.04158   | 59.3       | 6650       | 0.03066   |
| 47.9       | 8495       | 0.03917   | 67.7       | 6122       | 0.02823   |
| 53.7       | 8083       | 0.03727   | 76.2       | 5641       | 0.02601   |
| 0.0        | 7676       | 0.03539   | 85.1       | 5120       | 0.02361   |

*Supporting Information*

|       |      |         |       |      |         |
|-------|------|---------|-------|------|---------|
| 66.3  | 7125 | 0.03285 | 93.4  | 4666 | 0.02151 |
| 71.6  | 6863 | 0.03164 | 101.6 | 4383 | 0.02021 |
| 77.8  | 6477 | 0.02986 | 110.3 | 4144 | 0.01910 |
| 84.0  | 6016 | 0.02774 | 119.0 | 3756 | 0.01732 |
| 89.9  | 5891 | 0.02716 | 127.4 | 3506 | 0.01616 |
| 95.9  | 5483 | 0.02528 | 136.0 | 3290 | 0.01517 |
| 102.1 | 5145 | 0.02372 | 144.5 | 3152 | 0.01453 |
| 108.0 | 4836 | 0.02230 | 152.6 | 2977 | 0.01372 |
| 114.2 | 4564 | 0.02104 | 161.3 | 2735 | 0.01261 |
| 119.8 | 4217 | 0.01944 | 169.7 | 2400 | 0.01107 |
| 126.0 | 3833 | 0.01767 | 178.5 | 1973 | 0.00910 |
| 131.8 | 3613 | 0.01666 | 186.7 | 1656 | 0.00764 |
| 136.5 | 3407 | 0.01571 | 195.3 | 1250 | 0.00576 |
| 142.1 | 3140 | 0.01448 | 203.9 | 932  | 0.00429 |
| 148.7 | 3033 | 0.01398 | 212.8 | 657  | 0.00303 |
| 155.7 | 2770 | 0.01277 | 220.6 | 446  | 0.00206 |
| 162.0 | 2553 | 0.01177 | 229.0 | 295  | 0.00136 |
| 167.8 | 2399 | 0.01106 | 237.6 | 181  | 0.00084 |
| 173.9 | 2165 | 0.00998 | 246.4 | 98   | 0.00045 |
| 180.1 | 1948 | 0.00898 | 254.8 | 52   | 0.00024 |
| 185.9 | 1739 | 0.00802 | 263.4 | 0    | 0.00000 |
| 192.0 | 1513 | 0.00697 |       |      |         |
| 197.8 | 1300 | 0.00599 |       |      |         |
| 203.8 | 1136 | 0.00524 |       |      |         |
| 209.8 | 954  | 0.00440 |       |      |         |
| 216.0 | 782  | 0.00361 |       |      |         |
| 222.7 | 617  | 0.00285 |       |      |         |
| 230.0 | 443  | 0.00204 |       |      |         |
| 237.1 | 328  | 0.00151 |       |      |         |
| 244.9 | 229  | 0.00105 |       |      |         |
| 252.8 | 142  | 0.00065 |       |      |         |
| 260.9 | 88   | 0.00041 |       |      |         |
| 269.0 | 0    | 0.00000 |       |      |         |

**Experiment 24**

[VCP]<sub>0</sub> = 0.05 M VCP, [TBVE]<sub>0</sub> = 0.2 M TBVE, [2]<sub>T</sub> = 2.5 mM

Run 1: 66.4 mg VCP, 83 μL TBVE, 7.9 mg **2**, 3 mL THF

Product: 70:30 *trans/cis*, 11% ee *trans*, 3% ee *cis*

Run 2: 66.3 mg VCP, 83 μL TBVE, 7.9 mg **2**, 4 mL THF

Product: 70:30 *trans/cis*, 13% ee *trans*, 3% ee *cis*

| Run 1      |            |           | Run 2      |            |           |
|------------|------------|-----------|------------|------------|-----------|
| time (min) | area (mAU) | [VCP] (M) | time (min) | area (mAU) | [VCP] (M) |
| 0.2        | 10773      | 0.04967   | 0.2        | 10971      | 0.05059   |
| 8.7        | 10597      | 0.04886   | 8.7        | 10730      | 0.04947   |
| 17.0       | 10348      | 0.04771   | 17.2       | 10389      | 0.04790   |
| 25.5       | 10167      | 0.04688   | 25.3       | 10246      | 0.04724   |
| 33.8       | 9932       | 0.04579   | 33.9       | 9805       | 0.04521   |
| 42.5       | 9441       | 0.04353   | 42.8       | 9278       | 0.04278   |
| 50.9       | 8785       | 0.04050   | 50.7       | 8726       | 0.04024   |
| 59.9       | 8171       | 0.03768   | 59.6       | 8040       | 0.03707   |
| 68.1       | 7493       | 0.03455   | 68.1       | 7237       | 0.03337   |
| 77.3       | 6789       | 0.03130   | 76.6       | 6858       | 0.03162   |
| 85.0       | 6597       | 0.03042   | 85.2       | 6486       | 0.02991   |
| 93.9       | 6328       | 0.02918   | 93.3       | 6114       | 0.02819   |
| 102.2      | 6189       | 0.02854   | 102.0      | 6182       | 0.02850   |
| 111.0      | 6045       | 0.02787   | 110.9      | 5960       | 0.02748   |
| 119.0      | 5661       | 0.02610   | 118.8      | 5455       | 0.02515   |
| 127.5      | 5109       | 0.02355   | 127.4      | 5119       | 0.02360   |
| 136.4      | 4342       | 0.02002   | 136.1      | 4455       | 0.02054   |
| 144.6      | 3505       | 0.01616   | 144.6      | 3678       | 0.01696   |
| 153.1      | 2715       | 0.01252   | 153.2      | 3053       | 0.01408   |
| 161.6      | 2045       | 0.00943   | 161.5      | 2434       | 0.01122   |
| 169.8      | 1507       | 0.00695   | 170.3      | 1780       | 0.00821   |
| 178.6      | 997        | 0.00460   | 178.8      | 1268       | 0.00585   |
| 186.7      | 673        | 0.00310   | 186.9      | 912        | 0.00421   |
| 195.5      | 402        | 0.00185   | 196.3      | 566        | 0.00261   |
| 203.9      | 250        | 0.00115   | 204.4      | 356        | 0.00164   |
| 212.5      | 137        | 0.00063   | 212.6      | 230        | 0.00106   |
| 221.1      | 70         | 0.00032   | 221.1      | 122        | 0.00056   |
| 229.6      | 0          | 0.00000   | 229.0      | 87         | 0.00040   |

**Experiment 25**

$[\text{VCP}]_0 = 0.035 \text{ M VCP}$ ,  $[\text{TBVE}]_0 = 0.085 \text{ M TBVE}$ ,  $[\mathbf{2}]_T = 2.5 \text{ mM}$

Run 1: 46.4 mg VCP, 35  $\mu\text{L}$  TBVE, 7.9 mg **2**, 3 mL THF

Product: 70:30 *trans/cis*, 13% ee *trans*, 3% ee *cis*

Run 2: 46.3 mg VCP, 35  $\mu\text{L}$  TBVE, 7.8 mg **2**, 4 mL THF

Product: 70:30 *trans/cis*, 13% ee *trans*, 4% ee *cis*

| Run 1      |            |           | Run 2      |            |           |
|------------|------------|-----------|------------|------------|-----------|
| time (min) | area (mAU) | [VCP] (M) | time (min) | area (mAU) | [VCP] (M) |
| 0.2        | 7804       | 0.03598   | 0.2        | 7719       | 0.03559   |
| 9.0        | 7596       | 0.03502   | 8.6        | 7579       | 0.03494   |
| 18.4       | 7426       | 0.03424   | 17.1       | 7429       | 0.03425   |
| 27.6       | 7120       | 0.03283   | 25.4       | 7202       | 0.03320   |
| 37.9       | 6782       | 0.03127   | 34.0       | 7081       | 0.03265   |
| 47.7       | 6345       | 0.02925   | 43.2       | 6589       | 0.03038   |
| 56.8       | 5732       | 0.02643   | 51.5       | 6299       | 0.02904   |
| 66.4       | 5476       | 0.02525   | 59.4       | 6008       | 0.02770   |
| 75.8       | 4993       | 0.02302   | 68.3       | 5521       | 0.02546   |
| 85.6       | 4398       | 0.02028   | 76.7       | 5070       | 0.02338   |
| 94.6       | 3762       | 0.01734   | 85.6       | 4447       | 0.02050   |
| 104.4      | 3051       | 0.01407   | 93.3       | 3677       | 0.01696   |
| 113.8      | 2452       | 0.01131   | 102.4      | 3020       | 0.01392   |
| 123.5      | 1898       | 0.00875   | 110.4      | 2408       | 0.01110   |
| 133.1      | 1380       | 0.00636   | 119.1      | 1761       | 0.00812   |
| 142.4      | 976        | 0.00450   | 127.8      | 1274       | 0.00587   |
| 152.2      | 622        | 0.00287   | 136.0      | 872        | 0.00402   |
| 161.5      | 383        | 0.00177   | 144.1      | 573        | 0.00264   |
| 170.9      | 213        | 0.00098   | 153.1      | 336        | 0.00155   |
| 180.4      | 112        | 0.00051   | 161.3      | 196        | 0.00090   |
| 190.0      | 54         | 0.00025   | 170.3      | 93         | 0.00043   |
| 199.3      | 0          | 0.00000   | 178.5      | 0          | 0.00000   |



**Experiment 26**

$[(R)\text{-VCP}]_0 = 0.05 \text{ M VCP}$ ,  $[\text{TBVE}]_0 = 0.1 \text{ M TBVE}$ ,  $[\mathbf{2}]_T = 2.5 \text{ mM}$

Run 1: 66.5 mg VCP, 41  $\mu\text{L}$  TBVE, 7.9 mg **2**, 3 mL THF

Product: 70:30 *trans/cis*, 14% ee *trans*, 3% ee *cis*

Run 2: 66.5 mg VCP, 41  $\mu\text{L}$  TBVE, 7.8 mg **2**, 4 mL THF

Product: 71:29 *trans/cis*, 13% ee *trans*, 1% ee *cis*

| Run 1      |            |           | Run 2      |            |           |
|------------|------------|-----------|------------|------------|-----------|
| time (min) | area (mAU) | [VCP] (M) | time (min) | area (mAU) | [VCP] (M) |
| 0.2        | 10948      | 0.05048   | 0.2        | 10939      | 0.05044   |
| 8.6        | 10689      | 0.04928   | 5.2        | 10910      | 0.05030   |
| 16.2       | 10190      | 0.04698   | 10.0       | 10685      | 0.04926   |
| 25.7       | 9638       | 0.04444   | 15.0       | 10582      | 0.04879   |
| 33.1       | 8646       | 0.03987   | 20.1       | 10352      | 0.04773   |
| 43.0       | 7422       | 0.03422   | 24.8       | 10030      | 0.04624   |
| 51.4       | 6175       | 0.02847   | 29.9       | 9439       | 0.04352   |
| 60.6       | 4878       | 0.02249   | 35.1       | 9064       | 0.04179   |
| 67.0       | 3732       | 0.01721   | 40.7       | 8012       | 0.03694   |
| 76.9       | 2613       | 0.01205   | 45.5       | 7353       | 0.03390   |
| 84.0       | 1770       | 0.00816   | 50.2       | 6542       | 0.03016   |
| 93.9       | 1034       | 0.00477   | 54.9       | 5682       | 0.02620   |
| 102.8      | 534        | 0.00246   | 59.8       | 4784       | 0.02206   |
| 110.4      | 257        | 0.00118   | 65.0       | 3979       | 0.01835   |
| 119.9      | 111        | 0.00051   | 69.8       | 3217       | 0.01483   |
| 127.8      | 56         | 0.00026   | 74.9       | 2499       | 0.01152   |
| 135.0      | 0          | 0.00000   | 79.9       | 1895       | 0.00874   |
|            |            |           | 85.0       | 1341       | 0.00618   |
|            |            |           | 90.2       | 896        | 0.00413   |
|            |            |           | 94.9       | 601        | 0.00277   |
|            |            |           | 99.8       | 378        | 0.00174   |
|            |            |           | 105.0      | 229        | 0.00105   |
|            |            |           | 110.4      | 122        | 0.00056   |
|            |            |           | 114.9      | 82         | 0.00038   |
|            |            |           | 120.1      | 54         | 0.00025   |
|            |            |           | 124.8      | 0          | 0.00000   |

**Experiment 27**

$[(S)\text{-VCP}]_0 = 0.05 \text{ M VCP}$ ,  $[\text{TBVE}]_0 = 0.1 \text{ M TBVE}$ ,  $[\mathbf{2}]_T = 2.5 \text{ mM}$

Run 1: 66.3 mg VCP, 41  $\mu\text{L}$  TBVE, 7.9 mg **2**, 3 mL THF

Product: 70:30 *trans/cis*, 13% ee *trans*, 3% ee *cis*

Run 2: 66.3 mg VCP, 41  $\mu\text{L}$  TBVE, 7.7 mg **2**, 4 mL THF

Product: 71:29 *trans/cis*, 13% ee *trans*, 1% ee *cis*

| Run 1      |            |           | Run 2      |            |           |
|------------|------------|-----------|------------|------------|-----------|
| time (min) | area (mAU) | [VCP] (M) | time (min) | area (mAU) | [VCP] (M) |
| 0.2        | 10858      | 0.05006   | 0.2        | 10402      | 0.04796   |
| 8.5        | 10565      | 0.04871   | 5.7        | 10505      | 0.04844   |
| 16.9       | 10194      | 0.04700   | 11.1       | 10207      | 0.04706   |
| 25.5       | 9903       | 0.04566   | 16.4       | 10055      | 0.04636   |
| 34.0       | 9340       | 0.04306   | 22.0       | 10150      | 0.04680   |
| 42.7       | 8713       | 0.04017   | 27.6       | 9756       | 0.04498   |
| 51.6       | 7662       | 0.03533   | 33.3       | 9408       | 0.04338   |
| 59.8       | 6877       | 0.03171   | 38.6       | 9205       | 0.04244   |
| 68.1       | 5890       | 0.02716   | 44.1       | 8745       | 0.04032   |
| 76.5       | 4947       | 0.02281   | 49.7       | 8244       | 0.03801   |
| 85.0       | 3965       | 0.01828   | 55.2       | 7581       | 0.03495   |
| 93.4       | 2987       | 0.01377   | 61.0       | 6768       | 0.03121   |
| 102.0      | 2206       | 0.01017   | 66.8       | 6224       | 0.02870   |
| 111.0      | 1478       | 0.00681   | 71.8       | 5653       | 0.02606   |
| 118.7      | 999        | 0.00461   | 77.2       | 4853       | 0.02237   |
| 127.7      | 580        | 0.00267   | 82.7       | 4165       | 0.01920   |
| 136.1      | 329        | 0.00152   | 88.3       | 3511       | 0.01619   |
| 144.8      | 158        | 0.00073   | 93.7       | 2905       | 0.01340   |
| 153.2      | 79         | 0.00037   | 99.2       | 2313       | 0.01066   |
| 161.6      | 0          | 0.00000   | 104.5      | 1822       | 0.00840   |
|            |            |           | 110.0      | 1345       | 0.00620   |
|            |            |           | 115.8      | 966        | 0.00445   |
|            |            |           | 121.4      | 660        | 0.00304   |
|            |            |           | 126.8      | 438        | 0.00202   |
|            |            |           | 132.0      | 280        | 0.00129   |
|            |            |           | 137.7      | 176        | 0.00081   |
|            |            |           | 142.7      | 108        | 0.00050   |
|            |            |           | 148.7      | 60         | 0.00028   |
|            |            |           | 153.7      | 0          | 0.00000   |
